# Supplementary material for: Keto–enol tautomerism of β-diketo molecules in the presence of graphitic materials through π–π stacking
Source: Royal Society of Chemistry journal article supplement (doi:10.1039/d3cp05822k), 2024-01-01
Supplement: d3cp05822k1.pdf [file d3cp05822k1.pdf]

## **Keto-enol Tautomerism of $\beta$ -diketo Molecules in the Presence of Graphitic Materials Through $\pi$ - $\pi$ Stacking**

Sayantana Maity<sup>a</sup>, Jaipriya Khatri<sup>a</sup>, Vijay Kumar<sup>b, c\*</sup>, Basab Bijayi Dhar<sup>a\*</sup>

<sup>a</sup>Department of Chemistry, School of Natural Sciences, Shiv Nadar Institution of Eminence, Dadri, Gautam Buddha Nagar, UP-201314, India

<sup>b</sup>Center for Informatics, School of Natural Sciences, Shiv Nadar Institution of Eminence, Dadri, Gautam Buddha Nagar, UP-201314, India

<sup>c</sup>Dr. Vijay Kumar Foundation, 1969 Sector 4, Gurgaon, Haryana 122001, India

## Table of Contents

| Index                                                                                                                                                          | Page No. |
|----------------------------------------------------------------------------------------------------------------------------------------------------------------|----------|
| Synthesis and XPS analysis of GO and PGc                                                                                                                       | S3       |
| Table S3: Energy values of the optimized structures                                                                                                            | S5       |
| Figures: GO and diketo molecules                                                                                                                               | S6       |
| Figures: G and diketo molecules                                                                                                                                | S8       |
| Cartesian Coordinates of the optimized geometries                                                                                                              | S9       |
| Spectroscopic results of keto-enol tautomerism of Acetylacetone (AA), Methyl acetoacetate (MAA), and Dimethyl malonate (DMM) in the presence of G, GO, and PGc | S52      |
| References                                                                                                                                                     | S55      |

## Synthesis and XPS analysis of GO and P-Gc

GO was synthesized using Hummer's method.<sup>1</sup> 10 g Graphite powder and 5 g NaNO<sub>3</sub> was stirred in 230 ml concentrated H<sub>2</sub>SO<sub>4</sub> which was previously cooled. 30 g KMnO<sub>4</sub> powder was added to the suspension by portion and the temperature was maintained at ~20°C with ice flakes. After KMnO<sub>4</sub> addition was over, ice-flakes were removed and the temperature was elevated to 35°C and the stirring was continued for 30 mins leading the suspension to a thick paste. 450 ml water was added to it very slowly and the effervescence appeared, elevating the temperature of the reaction mixture. It was further heated at 98°C for 15 mins. The resultant brown solution was further diluted with warm water and 3% H<sub>2</sub>O<sub>2</sub> was added slowly, with rigorous stirring, until the suspension turned yellow-brown. After that it was cooled, filtered, and the residue was washed repeatedly with water and dried in oven to get brown powdered solid.

PGc was synthesized following our previous work.<sup>2</sup> 50% (w/v) aqueous solution of phytic acid was irradiated in multimodal scientific microwave oven (model: RG 31L, input voltage: 220 to 240 V, input frequency: 50 Hz, output frequency: 2450 MHz) for 40 seconds in 450 W power. The produced black charred material was cooled, washed repeatedly with water and dried in oven. Then it was grounded to dust using mortar and pestle, sonicated in water for 15 minutes, filtered using a G3 sintered glass crucible and finally the powdered material was dried in oven for overnight.

X-Ray photoelectron spectroscopy (XPS) measurements of GO and PGc were performed in ESCA, Omicron Nanotechnology, Oxford. The binding energies (BE) were calculated using the maximum intensity of the C 1s signal at 284.8 eV as the reference. The atomic percentages of the elements were calculated from the relative intensities of the peaks and considering the relative sensitivity factor (R.S.F.) of C as '1'. Deconvolution of the XP spectrum was done using XPS-Peak software using Gaussian peak shape followed by unbiased curve-fitting. Figures 4a and 4b show the deconvoluted C and O spectra of GO. Contribution of the different functional groups, obtained from the peak areas, are listed in Table S1. The same analysis on PGc was already reported in our previous work.<sup>2</sup> The derived results are presented here again in Table S2.

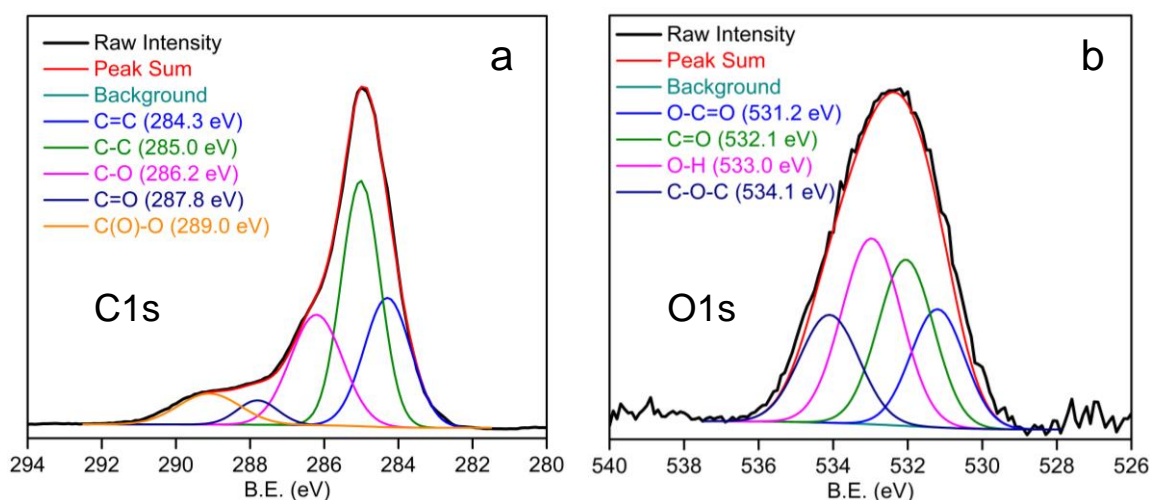

Fig. S1. Deconvolution of XP spectrum of (a) C1s and (b) O1s in GO.

Table S1. Quantification from XPS analysis: Atomic percentages and relative contribution of different functional groups in GO<sup>3</sup>

| Atomic % |       | C functionalities |              | O functionalities |              |
|----------|-------|-------------------|--------------|-------------------|--------------|
| Atom     | %     | Funct. group      | Contribution | Funct. group      | Contribution |
| C        | 72.38 | C=C               | 20.69%       | O-C=O             | 24.76%       |
|          |       | C-C               | 32.44%       | C=O               | 25.12%       |
|          |       | C-O               | 22.06%       | O-H               | 25.36%       |
| O        | 27.62 | C=O               | 11.37%       | C-O-C             | 24.76%       |
|          |       | C(O)-O            | 13.44%       |                   |              |

Table S2. Quantification from XPS analysis: Atomic percentages and relative contribution of different functional groups in PGc. Data extracted from our previous work.<sup>2</sup>

| Atomic % |       | C functionalities |              | O functionalities |              | P functionalities        |              |
|----------|-------|-------------------|--------------|-------------------|--------------|--------------------------|--------------|
| Atm.     | %     | Funct. Gr.        | Contribution | Funct. Gr.        | Contribution | Funct. Gr.               | Contribution |
| C        | 83.30 | C=C               | 46.32%       | Quinone           | 11.31%       | (Ar) <sub>3</sub> P(O)   | 26%          |
| O        | 13.51 | C-P, C-C          | 11.10%       | C=O, P=O          | 26.31%       | (Ar) <sub>2</sub> P(O)OH | 53%          |
| P        | 3.18  | C-OH              | 16.50%       | C-O,<br>P-O-C     | 41.08%       | COP(O)(OH) <sub>2</sub>  | 51%          |
|          |       | C=O               | 13.71%       | C-OH,<br>P-OH     | 18.30%       |                          |              |
|          |       | COOH              | 12.31%       | COOH              | 3.00%        |                          |              |

Table S3. Energy values of the optimized structure

|                       | AA                     |                                       | CF <sub>3</sub> _DK    |                                       | MAA                    |                                       | DMM                    |                                       |
|-----------------------|------------------------|---------------------------------------|------------------------|---------------------------------------|------------------------|---------------------------------------|------------------------|---------------------------------------|
|                       | E <sub>keto/enol</sub> | E <sub>keto</sub> - E <sub>enol</sub> | E <sub>keto/enol</sub> | E <sub>keto</sub> - E <sub>enol</sub> | E <sub>keto/enol</sub> | E <sub>keto</sub> - E <sub>enol</sub> | E <sub>keto/enol</sub> | E <sub>keto</sub> - E <sub>enol</sub> |
| Isolated molecules    | Keto                   | -69.998                               | -72.803                | 0.499                                 | -75.000                | 0.631                                 | -80.626                | -0.126                                |
|                       | Enol                   | -70.396                               | -73.302                |                                       | -75.631                |                                       | -80.500                |                                       |
| Stacked on P-Gc       | Keto                   | -680.210                              | -683.500               | §                                     | -685.553               | 0.074                                 | -690.785               | -0.054                                |
|                       | Enol                   | -680.720                              | -683.505               |                                       | -685.627               |                                       | -690.731               |                                       |
| Stacked on GO (above) | Keto                   | -989.242                              | -994.609               | 0.377                                 | -997.104               | 0.078                                 | -1002.455              | -0.050                                |
|                       | Enol                   | -989.499                              | -994.986               |                                       | -997.182               |                                       | -1002.405              |                                       |
| Stacked on GO (below) | Keto                   | -988.864                              | -994.376               | 0.528                                 | -996.603               | 0.667                                 | -1002.231              | -0.046                                |
|                       | Enol                   | -989.392                              | -994.904               |                                       | -997.270               |                                       | -1002.185              |                                       |
| Stacked on G          | Keto                   | -845.263                              | -848.145               | 0.503                                 | -850.400               | 0.640                                 | -856.028               | -0.077                                |
|                       | enol                   | -845.766                              | -848.648               |                                       | -851.040               |                                       | -855.951               |                                       |

§both keto and enol resulted in the enol form after stacking, so the “difference” between keto and enol cannot be calculated here

For each of the four diketo molecules, E<sub>keto</sub> - E<sub>enol</sub> energy was calculated and listed in each of the columns. It was a measurement of the relative stability of enol structures, in isolated and stacked condition. Except DMM, the other three diketo molecules were more stable in enol form. This enol-stability was observed increasing after stacking on P-Gc, G, and the ‘below’ side of GO, whereas for the ‘above’ side of GO this stability decreased. For the two esters, MAA and DMM, the E<sub>keto</sub> - E<sub>enol</sub> stabilization energy decreased in case of P-Gc too. It is clear from this comparison between isolated and stacked that, **stabilization of enol** is majorly controlled by  $\pi$ - $\pi$  stacking while we had discussed earlier from Table 1 (main manuscript) that **enolization** is mainly controlled by the effect of both graphitic  $\pi$ -cloud and acid containing functional groups.

Figures: GO and diketo molecules

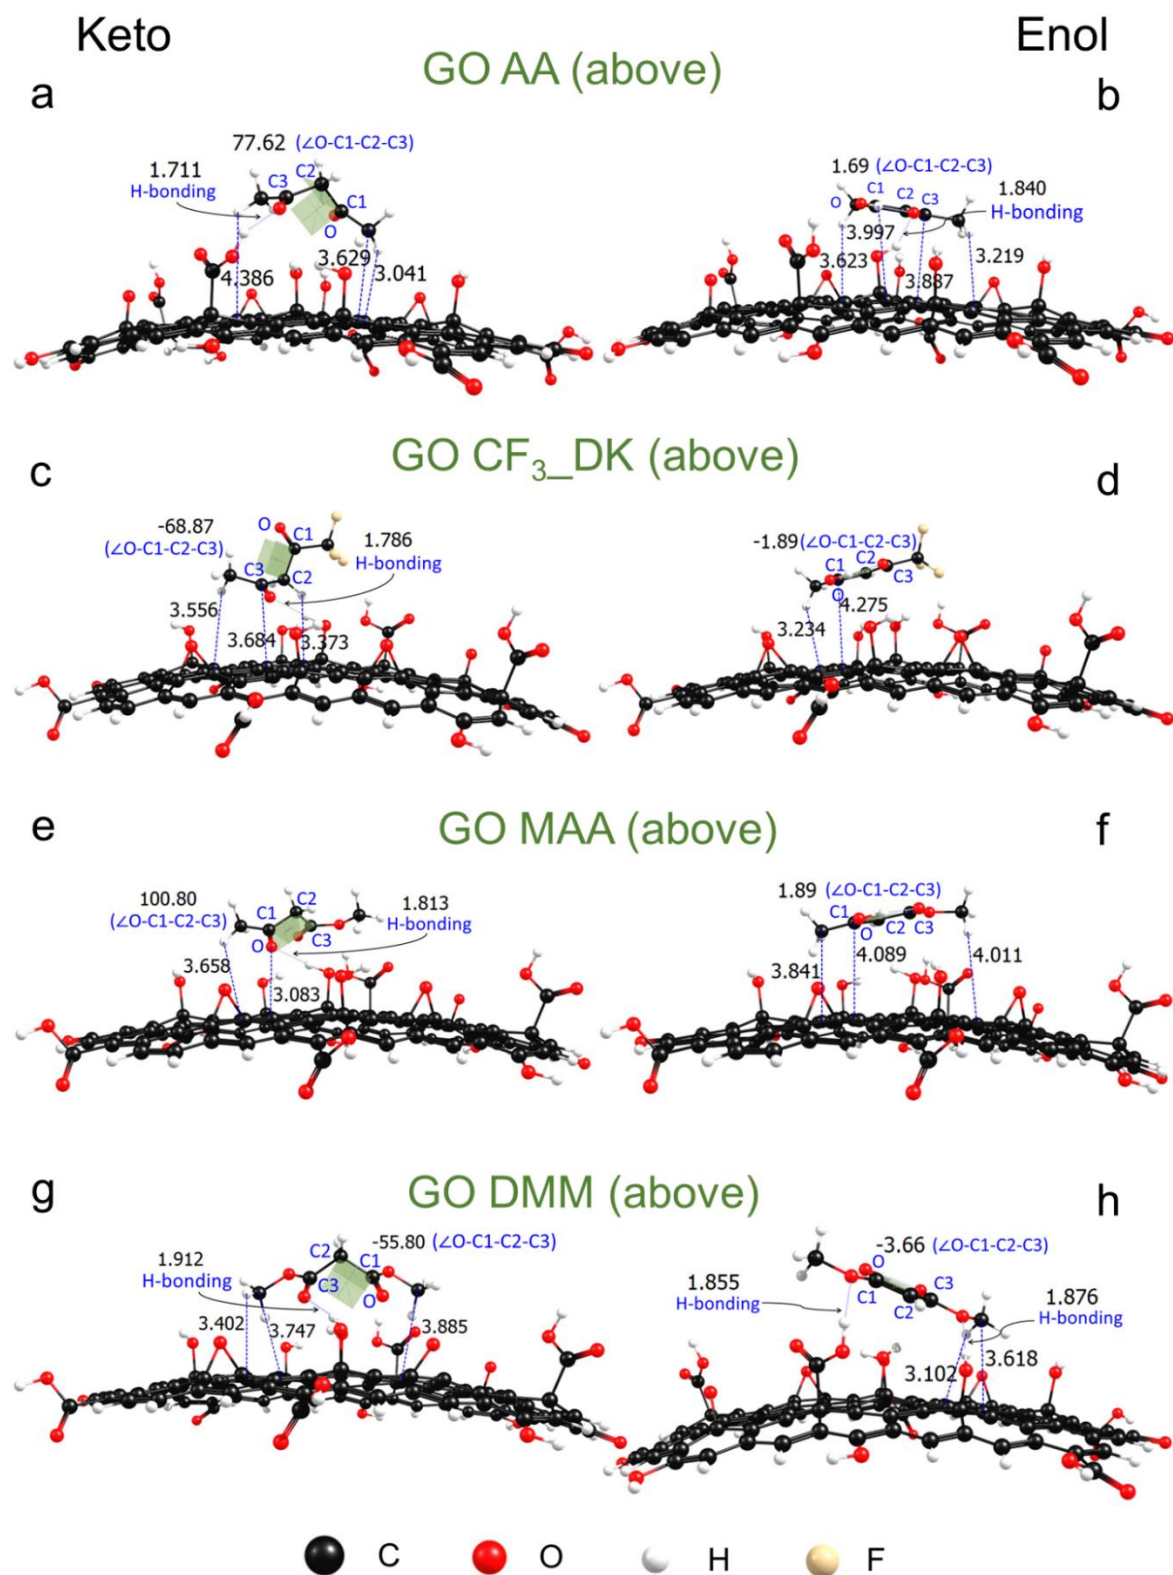

Fig. S2. The interaction of  $\beta$ -diketo molecules at the 'above' side of GO surface. Weak bonds are shown with dotted lines along with their bond lengths in Å. The dihedral angles are given in  $^{\circ}$ .

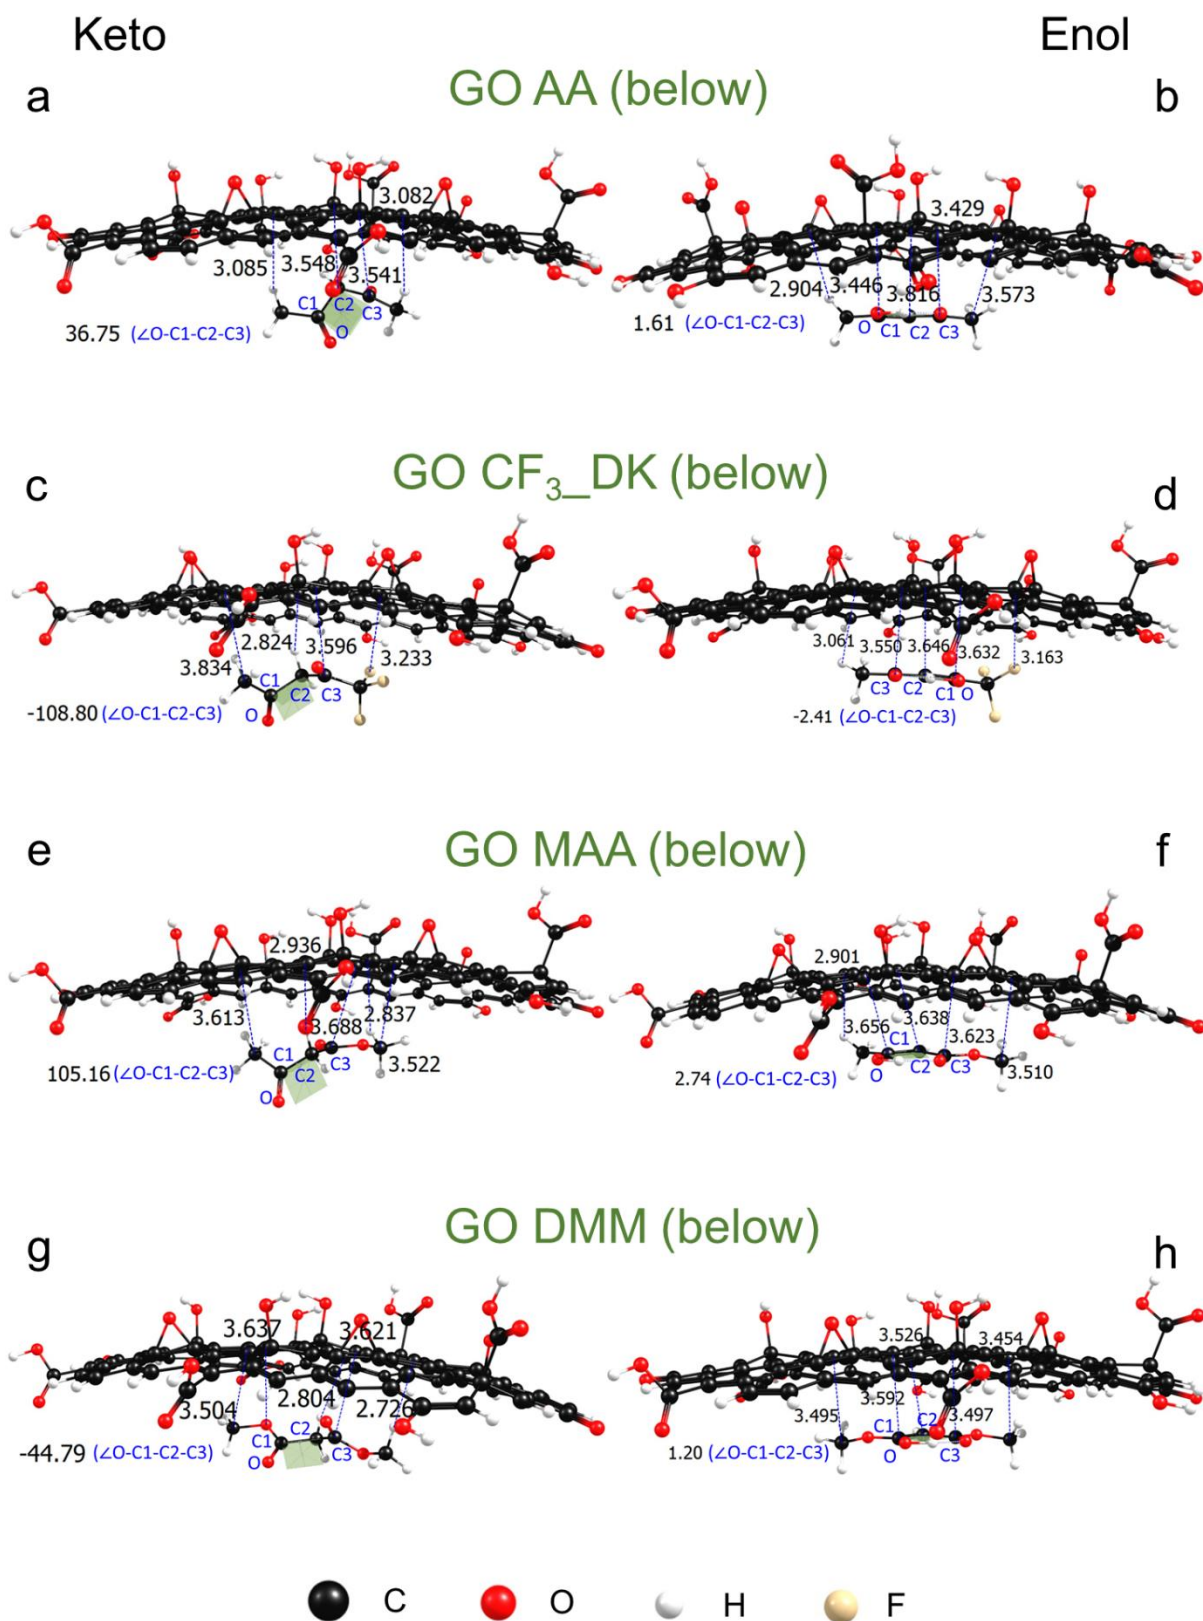

Fig. S3. The interaction of  $\beta$ -diketo molecules at the ‘below’ side of GO surface. Other details are the same as in Fig. S2.



Figures: G and diketo molecules

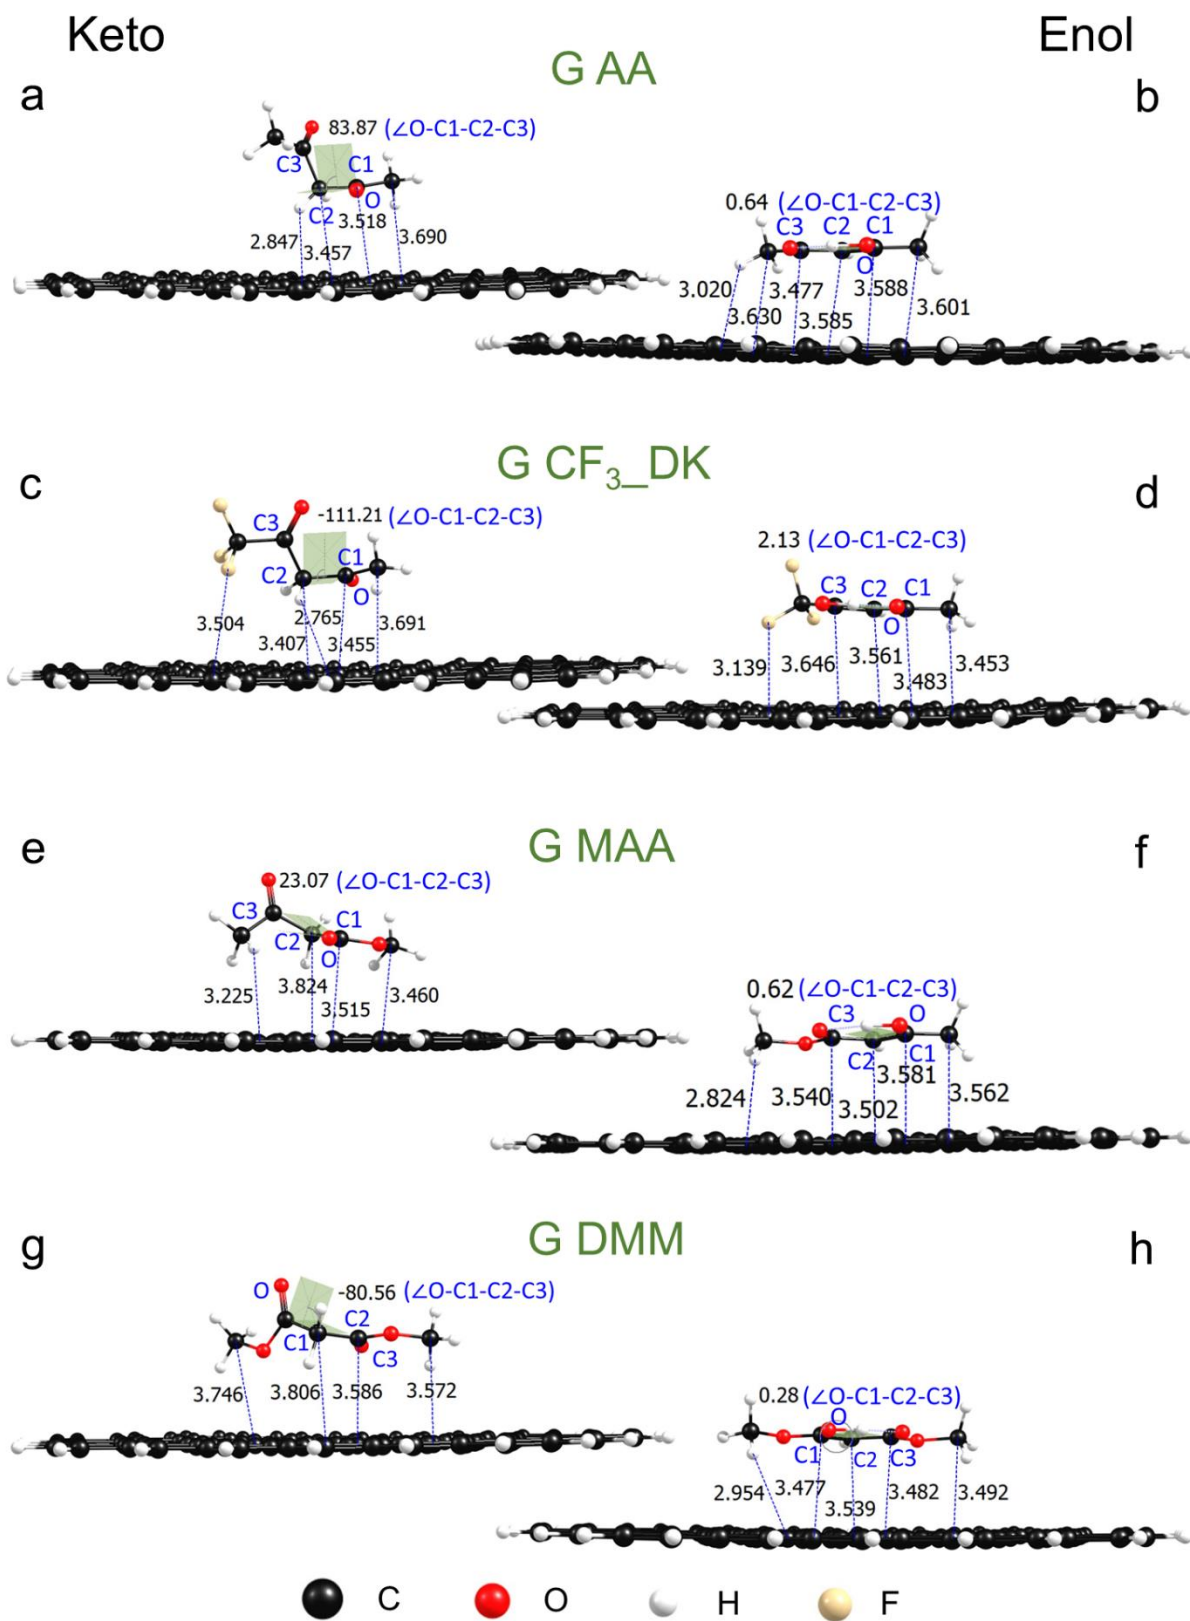

Fig S4. The interaction of  $\beta$ -diketo molecules over G surface. Other details are the same as in Fig. S2.



Cartesian coordinates of the optimized geometries:

| PGc-AA-keto |           |           |           |   |           |           |           |
|-------------|-----------|-----------|-----------|---|-----------|-----------|-----------|
| C           | 6.367886  | 11.253309 | 9.565232  | C | 3.169616  | 14.990115 | 10.656302 |
| C           | 6.541238  | 12.673401 | 9.930806  | C | 2.629158  | 11.110344 | 8.818461  |
| C           | 7.863398  | 13.316428 | 9.961861  | C | 1.813629  | 13.165395 | 9.839822  |
| C           | 9.088773  | 12.577882 | 9.966525  | C | 1.698801  | 12.137534 | 9.213548  |
| C           | 7.489424  | 10.366164 | 9.487946  | C | 7.481520  | 6.307173  | 12.478352 |
| C           | 10.286533 | 10.148995 | 9.348508  | C | 8.947648  | 5.923378  | 12.289345 |
| C           | 7.446423  | 9.070210  | 8.889467  | C | 9.987770  | 6.809681  | 12.480047 |
| C           | 10.395791 | 13.145838 | 9.802313  | C | 11.405882 | 6.517437  | 12.339936 |
| C           | 11.551917 | 10.840503 | 9.342461  | C | 12.432961 | 7.634370  | 12.602937 |
| C           | 11.615973 | 12.290319 | 9.698119  | O | 14.460912 | 11.427679 | 11.498646 |
| C           | 4.955699  | 9.057939  | 9.168640  | O | 9.021352  | 10.481648 | 11.959656 |
| C           | 5.042029  | 10.722025 | 9.215620  | O | 15.454699 | 12.688649 | 9.660517  |
| C           | 12.717331 | 10.081711 | 8.863399  | O | 2.655154  | 8.679532  | 9.989230  |
| C           | 12.510170 | 8.761693  | 8.263744  | O | 1.041454  | 7.720386  | 11.532251 |
| C           | 8.085867  | 14.736424 | 9.884372  | O | 0.326888  | 7.938009  | 8.886196  |
| C           | 10.504013 | 14.608196 | 9.742486  | O | 0.925761  | 9.598412  | 10.488065 |
| C           | 9.239608  | 15.289968 | 9.765878  | O | 11.006971 | 2.992470  | 8.521711  |
| C           | 5.338681  | 13.437676 | 10.066625 | O | 10.865243 | 2.702734  | 6.276771  |
| C           | 4.104430  | 12.881713 | 9.826121  | O | 5.771786  | 3.475542  | 6.955390  |
| C           | 3.914406  | 11.599088 | 9.396005  | O | 3.580854  | 4.814439  | 7.078803  |
| C           | 12.891027 | 12.972262 | 9.821194  | O | 14.196661 | 15.030643 | 9.913842  |
| C           | 11.810401 | 15.175187 | 9.715981  | O | 16.745164 | 6.142596  | 5.865919  |
| C           | 12.914738 | 14.382512 | 9.812850  | O | 9.327609  | 4.802304  | 11.924756 |
| C           | 14.079601 | 10.571505 | 9.006845  | O | 11.805598 | 5.395986  | 12.015390 |
| C           | 15.126552 | 9.801730  | 8.465455  | P | 8.980842  | 10.835931 | 10.370271 |
| C           | 14.944286 | 8.605209  | 7.845956  | P | 14.464763 | 12.072953 | 9.945025  |
| C           | 13.665514 | 8.002199  | 7.726679  | P | 1.293981  | 8.523654  | 10.101660 |
| C           | 13.495367 | 6.786429  | 7.176970  | P | 10.773649 | 3.685871  | 6.958717  |
| C           | 10.040515 | 8.873976  | 8.730278  | H | 14.779573 | 12.145582 | 12.096549 |
| C           | 8.675906  | 8.318443  | 8.588497  | H | 0.442342  | 7.654785  | 12.068629 |
| C           | 6.119362  | 8.548258  | 8.528226  | H | 0.083768  | 8.266729  | 8.255830  |
| C           | 6.082330  | 7.216387  | 8.004146  | H | 11.104628 | 2.196252  | 8.524686  |
| C           | 7.205255  | 6.497583  | 7.775124  | H | 14.066765 | 15.987947 | 9.903609  |
| C           | 11.187825 | 8.167141  | 8.189081  | H | 15.020923 | 4.334800  | 5.843581  |
| C           | 11.002835 | 6.832919  | 7.599193  | H | 12.916581 | 3.410746  | 5.602174  |
| C           | 12.165053 | 6.174566  | 7.100751  | H | 8.213694  | 3.413828  | 6.840253  |
| C           | 9.695131  | 6.302539  | 7.559103  | H | 2.844483  | 6.909095  | 8.307234  |
| C           | 8.532401  | 6.987850  | 7.978367  | H | 0.937452  | 13.782343 | 9.974317  |
| C           | 6.853635  | 15.657921 | 9.947989  | H | 2.293108  | 15.495279 | 11.034379 |
| C           | 5.429948  | 15.055116 | 10.285330 | H | 4.433476  | 16.569892 | 11.315034 |
| C           | 4.801151  | 6.701918  | 8.102611  | H | 9.260620  | 16.365986 | 9.675636  |
| C           | 3.865394  | 7.424047  | 8.637275  | H | 11.926998 | 16.244404 | 9.618099  |
| C           | 3.716931  | 8.637720  | 9.241195  | H | 16.133370 | 10.183929 | 8.546953  |
| C           | 12.032250 | 4.906898  | 6.521630  | H | 16.876906 | 7.982825  | 8.071067  |
| C           | 9.538467  | 5.001074  | 7.067527  | H | 0.718839  | 11.963462 | 8.794294  |
| C           | 7.057603  | 5.186128  | 7.307915  | H | 2.416902  | 10.336001 | 8.221971  |
| C           | 4.681284  | 5.346772  | 7.339906  | H | 6.961217  | 16.716373 | 9.762229  |
| C           | 8.293996  | 4.468949  | 7.056291  | H | 17.232583 | 6.880230  | 5.476399  |
| C           | 5.849478  | 4.697522  | 7.206845  | H | 6.906097  | 5.441636  | 12.793435 |
| C           | 13.013257 | 4.368941  | 6.090964  | H | 7.381014  | 7.082752  | 13.230455 |
| C           | 14.400211 | 6.112652  | 6.712658  | H | 7.048019  | 6.675336  | 11.550573 |

|             |           |           |           |   |           |           |           |
|-------------|-----------|-----------|-----------|---|-----------|-----------|-----------|
| C           | 14.171620 | 4.901363  | 6.195845  | H | 12.452143 | 7.917639  | 13.661473 |
| C           | 15.696576 | 6.663996  | 6.703897  | H | 13.445533 | 7.318283  | 12.327449 |
| C           | 5.912509  | 7.817145  | 7.614023  | H | 12.199566 | 8.535392  | 12.024323 |
| C           | 2.972779  | 13.679083 | 10.034849 | H | 9.651141  | 7.397696  | 13.249559 |
| C           | 4.364015  | 15.624718 | 10.797132 | H | 10.291617 | 7.385267  | 11.804690 |
| PGc-AA-enol |           |           |           |   |           |           |           |
| C           | 11.286583 | 13.168193 | 9.758833  | C | 8.198217  | 17.263678 | 10.048506 |
| C           | 11.485813 | 14.544072 | 10.183412 | C | 7.837145  | 13.414479 | 8.298114  |
| C           | 12.787674 | 15.084868 | 10.500522 | C | 6.899687  | 15.589360 | 8.774054  |
| C           | 13.967487 | 14.318224 | 10.432099 | C | 6.821603  | 14.348664 | 8.140344  |
| C           | 12.372978 | 12.244615 | 9.689796  | C | 13.842557 | 7.191034  | 11.286096 |
| C           | 15.105626 | 12.023553 | 9.445657  | C | 15.243647 | 7.728233  | 11.241009 |
| C           | 12.309825 | 11.014781 | 9.032582  | C | 15.548208 | 8.999569  | 11.788487 |
| C           | 15.263483 | 14.852491 | 10.439699 | C | 16.850071 | 9.486063  | 11.775864 |
| C           | 16.326431 | 12.707420 | 9.431907  | C | 17.239380 | 10.801443 | 12.352920 |
| C           | 16.435858 | 14.076882 | 10.038136 | O | 19.721237 | 15.113918 | 8.375024  |
| C           | 9.851658  | 11.303791 | 9.110820  | O | 13.953728 | 12.004610 | 11.935545 |
| C           | 10.013290 | 12.722001 | 9.334890  | O | 20.186447 | 13.772435 | 10.578075 |
| C           | 17.437576 | 12.009216 | 8.809539  | O | 7.643627  | 11.284086 | 10.012803 |
| C           | 17.248606 | 10.687674 | 8.274418  | O | 6.192834  | 9.527263  | 10.967831 |
| C           | 12.931816 | 16.480032 | 10.830681 | O | 5.504491  | 10.579250 | 8.803857  |
| C           | 15.383965 | 16.238005 | 10.821868 | O | 5.395509  | 12.031615 | 10.959071 |
| C           | 14.222702 | 16.994513 | 11.038107 | O | 15.781741 | 5.063241  | 8.960619  |
| C           | 10.377593 | 15.426255 | 10.169291 | O | 15.358828 | 4.394198  | 6.531610  |
| C           | 9.124766  | 15.010053 | 9.612526  | O | 10.367566 | 5.372638  | 6.773773  |
| C           | 8.965152  | 13.688792 | 9.100117  | O | 8.194023  | 6.684584  | 7.911413  |
| C           | 17.663935 | 14.740718 | 10.158243 | O | 19.057268 | 16.456314 | 11.005254 |
| C           | 16.669594 | 16.798080 | 11.029900 | O | 21.599659 | 7.994035  | 5.894754  |
| C           | 17.773109 | 16.035707 | 10.757507 | O | 16.168186 | 7.003175  | 10.713440 |
| C           | 19.792864 | 11.909609 | 8.118792  | O | 17.840485 | 8.779872  | 11.247348 |
| C           | 19.630411 | 10.627776 | 7.575512  | P | 13.855259 | 12.579973 | 10.554783 |
| C           | 18.354309 | 9.998404  | 7.686704  | P | 19.171970 | 14.164309 | 9.374908  |
| C           | 18.219656 | 8.655685  | 7.225283  | P | 6.095150  | 10.952553 | 10.253844 |
| C           | 14.840206 | 10.764362 | 8.810424  | P | 15.575559 | 5.534654  | 7.451228  |
| C           | 13.508845 | 10.242674 | 8.696055  | H | 20.519852 | 14.588327 | 11.003490 |
| C           | 10.995467 | 10.496856 | 8.785639  | H | 5.375791  | 9.293145  | 11.446065 |
| C           | 10.839958 | 9.154958  | 8.362334  | H | 4.980676  | 11.323850 | 8.452976  |
| C           | 12.017107 | 8.369222  | 8.027770  | H | 15.912222 | 5.789937  | 9.656964  |
| C           | 15.962350 | 10.032450 | 8.293655  | H | 19.064888 | 17.407339 | 11.217131 |
| C           | 15.810811 | 8.687916  | 7.855598  | H | 20.108027 | 6.154142  | 5.787477  |
| C           | 16.981781 | 7.956953  | 7.382613  | H | 17.987535 | 4.888272  | 6.215983  |
| C           | 14.485554 | 8.113594  | 7.849111  | H | 12.837353 | 5.211319  | 7.018998  |
| C           | 13.337433 | 8.923810  | 8.174608  | H | 7.504345  | 8.786433  | 8.963114  |
| C           | 11.779245 | 17.291397 | 10.929840 | H | 6.085001  | 16.310787 | 8.681155  |
| C           | 10.525978 | 16.802397 | 10.597486 | H | 7.344449  | 17.943621 | 10.001722 |
| C           | 9.544876  | 8.596853  | 8.348032  | H | 9.495895  | 18.683081 | 10.974735 |
| C           | 8.455859  | 9.310034  | 8.869873  | H | 14.327758 | 18.037806 | 11.348138 |
| C           | 8.617997  | 10.613139 | 9.293880  | H | 16.764380 | 17.818701 | 11.411144 |
| C           | 18.744034 | 12.563208 | 8.735479  | H | 20.770672 | 12.394593 | 8.061113  |
| C           | 16.971104 | 6.579018  | 7.056541  | H | 21.679129 | 10.497180 | 6.873661  |
| C           | 14.255890 | 6.746164  | 7.509389  | H | 5.959508  | 14.112927 | 7.512753  |
| C           | 11.857572 | 7.051471  | 7.563112  | H | 7.773007  | 12.459679 | 7.775576  |
| C           | 9.300243  | 7.218689  | 7.881978  | H | 11.889278 | 18.341146 | 11.214623 |

|                              |           |           |           |   |           |           |           |
|------------------------------|-----------|-----------|-----------|---|-----------|-----------|-----------|
| C                            | 12.980659 | 6.249277  | 7.328892  | H | 22.394989 | 8.556167  | 5.851822  |
| C                            | 10.522757 | 6.447637  | 7.344383  | H | 13.757574 | 6.496538  | 12.138012 |
| C                            | 18.076180 | 5.944305  | 6.479684  | H | 14.758971 | 9.633574  | 12.190446 |
| C                            | 19.344761 | 7.983627  | 6.644107  | H | 13.104032 | 7.991272  | 11.420614 |
| C                            | 19.248180 | 6.640761  | 6.246386  | H | 13.619104 | 6.616944  | 10.376668 |
| C                            | 20.588036 | 8.689072  | 6.493430  | H | 17.393061 | 7.905689  | 10.916286 |
| C                            | 20.725130 | 9.968996  | 6.956524  | H | 17.748985 | 10.636421 | 13.316587 |
| C                            | 8.052250  | 15.948747 | 9.485083  | H | 17.958855 | 11.306043 | 11.692141 |
| C                            | 9.378691  | 17.669373 | 10.585186 | H | 16.356676 | 11.432635 | 12.516351 |
| PGc-CF <sub>3</sub> _DK-keto |           |           |           |   |           |           |           |
| C                            | 11.218298 | 16.118977 | 9.738101  | C | 8.192074  | 20.254572 | 10.082857 |
| C                            | 11.425579 | 17.471577 | 10.228559 | C | 7.836159  | 16.488371 | 8.157880  |
| C                            | 12.725412 | 17.976852 | 10.608109 | C | 6.918303  | 18.659389 | 8.686993  |
| C                            | 13.898579 | 17.198940 | 10.531224 | C | 6.844968  | 17.448093 | 7.998242  |
| C                            | 12.291082 | 15.181921 | 9.664500  | C | 13.958496 | 11.170177 | 11.604461 |
| C                            | 15.021217 | 14.939380 | 9.456726  | C | 15.439205 | 11.260212 | 11.420719 |
| C                            | 12.221969 | 13.970023 | 8.975922  | C | 16.146746 | 12.420288 | 11.879965 |
| C                            | 15.199396 | 17.724348 | 10.548886 | C | 17.514332 | 12.449744 | 11.755035 |
| C                            | 16.243074 | 15.619342 | 9.444180  | C | 18.359528 | 13.605654 | 12.278027 |
| C                            | 16.362059 | 16.970322 | 10.083018 | O | 19.005630 | 19.357208 | 10.978036 |
| C                            | 9.770136  | 14.302767 | 8.981125  | O | 7.526015  | 14.310758 | 9.793105  |
| C                            | 9.953198  | 15.711156 | 9.253355  | O | 13.816439 | 14.793557 | 11.913860 |
| C                            | 17.344595 | 14.931829 | 8.788895  | O | 20.203833 | 16.815735 | 10.311289 |
| C                            | 17.155802 | 13.600893 | 8.278876  | O | 19.407423 | 18.110949 | 8.176708  |
| C                            | 12.879885 | 19.355690 | 10.995826 | O | 5.940659  | 12.589605 | 10.592714 |
| C                            | 15.329319 | 19.095253 | 10.978405 | O | 5.452914  | 13.728661 | 8.419310  |
| C                            | 14.174172 | 19.848032 | 11.235365 | O | 5.248147  | 15.123756 | 10.606574 |
| C                            | 10.332945 | 18.373024 | 10.212489 | O | 15.646376 | 8.141192  | 9.262923  |
| C                            | 9.096399  | 18.003639 | 9.589663  | O | 15.287714 | 7.202266  | 6.915135  |
| C                            | 8.934196  | 16.707779 | 9.016086  | O | 10.276302 | 8.317081  | 6.737958  |
| C                            | 17.588823 | 17.642611 | 10.161673 | O | 8.075931  | 9.718859  | 7.686572  |
| C                            | 16.619825 | 19.652828 | 11.162292 | O | 21.482395 | 10.851906 | 5.925941  |
| C                            | 17.715307 | 18.917202 | 10.798981 | O | 16.080740 | 10.295012 | 10.879171 |
| C                            | 18.639006 | 15.502411 | 8.654613  | O | 18.228889 | 11.477323 | 11.221855 |
| C                            | 19.677464 | 14.843687 | 8.024761  | P | 19.041010 | 17.134684 | 9.233834  |
| C                            | 19.520832 | 13.538713 | 7.533904  | P | 13.762082 | 15.459752 | 10.571012 |
| C                            | 18.254499 | 12.901314 | 7.691977  | P | 5.952269  | 14.037039 | 9.917820  |
| C                            | 18.121637 | 11.540602 | 7.283582  | P | 15.475908 | 8.443847  | 7.698069  |
| C                            | 14.749679 | 13.689701 | 8.806944  | H | 20.496008 | 17.648584 | 10.734353 |
| C                            | 13.416116 | 13.183969 | 8.663708  | H | 5.095857  | 12.394939 | 11.039433 |
| C                            | 10.908527 | 13.477061 | 8.682755  | H | 4.992885  | 14.507434 | 8.053432  |
| C                            | 10.745840 | 12.138412 | 8.247931  | H | 15.718597 | 8.932190  | 9.868902  |
| C                            | 11.920103 | 11.324766 | 7.971170  | H | 19.007318 | 20.299343 | 11.226357 |
| C                            | 15.871063 | 12.946002 | 8.313004  | H | 20.007425 | 8.980639  | 5.953248  |
| C                            | 15.716432 | 11.592846 | 7.910694  | H | 17.905182 | 7.721200  | 6.479897  |
| C                            | 16.888981 | 10.843418 | 7.478992  | H | 12.732705 | 8.115412  | 7.125612  |
| C                            | 14.387825 | 11.029091 | 7.894628  | H | 7.382955  | 11.832021 | 8.711630  |
| C                            | 13.241543 | 11.862000 | 8.154631  | H | 6.120952  | 19.399530 | 8.591048  |
| C                            | 11.736548 | 20.179792 | 11.098452 | H | 7.353335  | 20.952406 | 10.029487 |
| C                            | 10.487437 | 19.726978 | 10.703932 | H | 9.475591  | 21.609718 | 11.118864 |
| C                            | 9.442941  | 11.604565 | 8.181099  | H | 14.287061 | 20.877905 | 11.584675 |
| C                            | 8.347093  | 12.338012 | 8.658323  | H | 16.723840 | 20.659998 | 11.575491 |
| C                            | 8.516348  | 13.634172 | 9.102140  | H | 20.647663 | 15.336916 | 7.926255  |

|   |           |           |           |   |           |           |           |
|---|-----------|-----------|-----------|---|-----------|-----------|-----------|
| C | 16.879635 | 9.449820  | 7.229715  | H | 21.554796 | 13.394621 | 6.791985  |
| C | 14.154313 | 9.650515  | 7.609270  | H | 6.005680  | 17.256908 | 7.326162  |
| C | 11.761255 | 9.995486  | 7.538146  | H | 7.777984  | 15.556638 | 7.594282  |
| C | 9.194522  | 10.225321 | 7.717665  | H | 11.854311 | 21.215599 | 11.427878 |
| C | 12.880674 | 9.164613  | 7.392282  | H | 22.271698 | 11.418388 | 5.845254  |
| C | 10.427131 | 9.410462  | 7.273774  | H | 13.760636 | 10.691032 | 12.578619 |
| C | 17.985661 | 8.791481  | 6.681534  | H | 15.596992 | 13.268106 | 12.288743 |
| C | 19.243034 | 10.848773 | 6.721116  | H | 13.501289 | 12.169244 | 11.628620 |
| C | 19.149603 | 9.485286  | 6.396444  | H | 13.508829 | 10.541417 | 10.825527 |
| C | 20.475624 | 11.561128 | 6.515506  | H | 17.504814 | 10.767891 | 10.957650 |
| C | 20.607813 | 12.862535 | 6.918988  | F | 17.619759 | 14.732909 | 12.445565 |
| C | 8.046453  | 18.967045 | 9.459118  | F | 18.897680 | 13.280043 | 13.490649 |
| C | 9.356470  | 20.615116 | 10.683331 | F | 19.383244 | 13.892837 | 11.437122 |

PGc-CF<sub>3</sub>\_DK-enol

|   |           |           |           |   |           |           |           |
|---|-----------|-----------|-----------|---|-----------|-----------|-----------|
| C | 11.227505 | 16.119150 | 9.815004  | C | 8.198110  | 20.240316 | 10.289736 |
| C | 11.448474 | 17.472528 | 10.296852 | C | 7.789629  | 16.481668 | 8.360180  |
| C | 12.760687 | 17.984692 | 10.618837 | C | 6.882088  | 18.646978 | 8.930894  |
| C | 13.933088 | 17.211945 | 10.491723 | C | 6.790606  | 17.438976 | 8.238257  |
| C | 12.299002 | 15.184130 | 9.701832  | C | 14.058372 | 11.215355 | 11.613369 |
| C | 15.018826 | 14.947659 | 9.386492  | C | 15.532648 | 11.283513 | 11.376852 |
| C | 12.206743 | 13.971746 | 9.016080  | C | 16.269602 | 12.443476 | 11.787988 |
| C | 15.230136 | 17.744783 | 10.444323 | C | 17.631397 | 12.456375 | 11.608619 |
| C | 16.237339 | 15.630364 | 9.321351  | C | 18.508179 | 13.612607 | 12.075909 |
| C | 16.374899 | 16.992102 | 9.933795  | O | 19.036428 | 19.428364 | 10.627123 |
| C | 9.756897  | 14.302027 | 9.106570  | O | 7.552450  | 14.301138 | 10.012709 |
| C | 9.946519  | 15.708735 | 9.377844  | O | 13.919489 | 14.814918 | 11.890652 |
| C | 17.318750 | 14.931752 | 8.644292  | O | 20.227867 | 16.890951 | 9.991184  |
| C | 17.119080 | 13.587475 | 8.174498  | O | 19.311850 | 18.103539 | 7.855893  |
| C | 12.924475 | 19.365305 | 10.995485 | O | 5.967421  | 12.568418 | 10.802788 |
| C | 15.370953 | 19.121580 | 10.852095 | O | 5.401745  | 13.825374 | 8.720130  |
| C | 14.225430 | 19.867731 | 11.165434 | O | 5.339700  | 15.112770 | 10.982702 |
| C | 10.351811 | 18.368774 | 10.327663 | O | 15.589306 | 8.132517  | 9.267186  |
| C | 9.093366  | 17.996105 | 9.752623  | O | 15.196371 | 7.179864  | 6.929813  |
| C | 8.915754  | 16.702057 | 9.180696  | O | 10.187413 | 8.292476  | 6.895953  |
| C | 17.597572 | 17.676596 | 9.939110  | O | 7.999644  | 9.770545  | 7.735751  |
| C | 16.663010 | 19.695673 | 10.954299 | O | 21.429644 | 10.743586 | 5.904809  |
| C | 17.744057 | 18.966686 | 10.538975 | O | 16.143209 | 10.300547 | 10.831335 |
| C | 18.607050 | 15.501216 | 8.459042  | O | 18.314810 | 11.467273 | 11.065360 |
| C | 19.635912 | 14.821214 | 7.837043  | P | 19.010813 | 17.157734 | 8.960035  |
| C | 19.474918 | 13.497305 | 7.402935  | P | 13.804585 | 15.472203 | 10.547062 |
| C | 18.208382 | 12.868817 | 7.593231  | P | 5.981813  | 14.048922 | 10.203687 |
| C | 18.066996 | 11.497556 | 7.225444  | P | 15.402791 | 8.425309  | 7.701955  |
| C | 14.727009 | 13.689592 | 8.761309  | H | 20.528814 | 17.742998 | 10.367494 |
| C | 13.389330 | 13.184039 | 8.665219  | H | 5.145975  | 12.375966 | 11.292110 |
| C | 10.884322 | 13.478769 | 8.765732  | H | 4.973968  | 14.642633 | 8.401782  |
| C | 10.704880 | 12.143035 | 8.328343  | H | 15.708944 | 8.927726  | 9.860233  |
| C | 11.868936 | 11.325886 | 8.020443  | H | 19.039177 | 20.376488 | 10.851177 |
| C | 15.833897 | 12.936336 | 8.249017  | H | 19.937716 | 8.894161  | 5.958636  |
| C | 15.666175 | 11.577086 | 7.872381  | H | 17.821867 | 7.664256  | 6.500333  |
| C | 16.830120 | 10.813271 | 7.440229  | H | 12.649085 | 8.107265  | 7.182446  |
| C | 14.334416 | 11.019914 | 7.889190  | H | 7.352591  | 11.844866 | 8.878458  |
| C | 13.196895 | 11.859359 | 8.168962  | H | 6.079309  | 19.384590 | 8.865632  |
| C | 11.782313 | 20.182442 | 11.152707 | H | 7.354564  | 20.934196 | 10.272660 |

|   |           |           |           |   |           |           |           |
|---|-----------|-----------|-----------|---|-----------|-----------|-----------|
| C | 10.519465 | 19.722326 | 10.815230 | H | 9.514828  | 21.596939 | 11.281104 |
| C | 9.397464  | 11.616773 | 8.286429  | H | 14.348925 | 20.900894 | 11.501307 |
| C | 8.317516  | 12.346825 | 8.805061  | H | 16.778231 | 20.711205 | 11.343313 |
| C | 8.507366  | 13.633819 | 9.266334  | H | 20.603674 | 15.311195 | 7.704566  |
| C | 16.810328 | 9.415761  | 7.215417  | H | 21.508280 | 13.319865 | 6.667029  |
| C | 14.088115 | 9.639887  | 7.621059  | H | 5.931651  | 17.249943 | 7.590549  |
| C | 11.694794 | 9.994269  | 7.600259  | H | 7.715635  | 15.552087 | 7.794733  |
| C | 9.128930  | 10.249194 | 7.800662  | H | 11.909041 | 21.219185 | 11.475658 |
| C | 12.807779 | 9.158138  | 7.436137  | H | 22.223312 | 11.301652 | 5.809015  |
| C | 10.352709 | 9.408474  | 7.378044  | H | 13.888407 | 10.739030 | 12.594184 |
| C | 17.911488 | 8.737369  | 6.681901  | H | 15.744472 | 13.303739 | 12.203025 |
| C | 19.184525 | 10.784256 | 6.681631  | H | 13.616019 | 12.220661 | 11.651321 |
| C | 19.082306 | 9.414709  | 6.387752  | H | 13.573274 | 10.591249 | 10.851925 |
| C | 20.423088 | 11.480723 | 6.459540  | H | 17.574194 | 10.760191 | 10.843873 |
| C | 20.559427 | 12.795938 | 6.812838  | F | 17.786205 | 14.749056 | 12.256555 |
| C | 8.035209  | 18.955395 | 9.664889  | F | 19.095768 | 13.300528 | 13.269004 |
| C | 9.383489  | 20.603865 | 10.845659 | F | 19.497128 | 13.877614 | 11.187195 |

PGc-MAA-keto

|   |           |           |           |   |           |           |           |
|---|-----------|-----------|-----------|---|-----------|-----------|-----------|
| C | 9.299593  | 14.172739 | 9.728807  | C | 5.923559  | 14.562222 | 8.138636  |
| C | 9.516057  | 15.525636 | 10.214864 | C | 5.022542  | 16.742943 | 8.656111  |
| C | 10.817863 | 16.020868 | 10.601473 | C | 4.940909  | 15.529485 | 7.972083  |
| C | 11.982875 | 15.230170 | 10.542583 | C | 13.100510 | 9.023898  | 11.548699 |
| C | 10.364948 | 13.226644 | 9.664024  | C | 13.556353 | 10.117297 | 12.488073 |
| C | 13.096947 | 12.954858 | 9.491683  | C | 15.058162 | 10.205081 | 12.607659 |
| C | 10.292327 | 12.015405 | 8.974440  | C | 17.032070 | 11.003347 | 11.585463 |
| C | 13.289495 | 15.738642 | 10.586613 | C | 11.620064 | 8.762334  | 11.507826 |
| C | 14.326135 | 13.620483 | 9.502073  | O | 18.217138 | 14.600864 | 10.596179 |
| C | 14.451679 | 14.964054 | 10.154773 | O | 11.861739 | 12.831333 | 11.931449 |
| C | 7.843845  | 12.366383 | 8.962696  | O | 17.705523 | 16.062311 | 8.481684  |
| C | 8.033762  | 13.772930 | 9.239540  | O | 5.600710  | 12.380571 | 9.773107  |
| C | 15.424207 | 12.934086 | 8.844276  | O | 4.018121  | 10.652655 | 10.562621 |
| C | 15.224387 | 11.618950 | 8.301478  | O | 3.515332  | 11.820452 | 8.407505  |
| C | 10.983653 | 17.400244 | 10.984154 | O | 3.330826  | 13.187761 | 10.613570 |
| C | 13.430360 | 17.107584 | 11.018246 | O | 13.694945 | 6.224070  | 9.251514  |
| C | 12.279811 | 17.878229 | 11.243046 | O | 13.332520 | 5.236279  | 6.917295  |
| C | 8.431348  | 16.436007 | 10.190226 | O | 8.322310  | 6.370399  | 6.722441  |
| C | 7.193285  | 16.073149 | 9.566586  | O | 6.113001  | 7.845501  | 7.520953  |
| C | 7.022030  | 14.776136 | 8.997942  | O | 17.108923 | 17.265713 | 11.200571 |
| C | 15.688476 | 15.607983 | 10.287750 | O | 19.530449 | 8.886043  | 5.894042  |
| C | 14.724815 | 17.637802 | 11.252369 | O | 13.907057 | 8.384506  | 10.865801 |
| C | 15.817769 | 16.873478 | 10.943205 | O | 15.717712 | 9.681420  | 13.489630 |
| C | 16.726768 | 13.491556 | 8.737823  | O | 15.587120 | 10.936058 | 11.594269 |
| C | 17.756943 | 12.847412 | 8.077040  | P | 11.828100 | 13.492465 | 10.584625 |
| C | 17.586819 | 11.559529 | 7.546043  | P | 17.175549 | 15.062099 | 9.441288  |
| C | 16.317625 | 10.925135 | 7.698600  | P | 4.027446  | 12.108594 | 9.905709  |
| C | 16.177200 | 9.571335  | 7.270456  | P | 13.523306 | 6.487696  | 7.683999  |
| C | 12.819581 | 11.714256 | 8.828527  | H | 18.553308 | 15.388831 | 11.069440 |
| C | 11.482555 | 11.221370 | 8.668846  | H | 3.173752  | 10.451807 | 11.007368 |
| C | 8.977835  | 11.534251 | 8.666511  | H | 3.062109  | 12.607828 | 8.051679  |
| C | 8.807503  | 10.201469 | 8.216649  | H | 13.734497 | 7.037004  | 9.842210  |
| C | 9.977334  | 9.381184  | 7.941509  | H | 17.132391 | 18.207964 | 11.447741 |
| C | 13.937081 | 10.971336 | 8.326764  | H | 18.044519 | 7.021518  | 5.895998  |
| C | 13.774833 | 9.626148  | 7.904325  | H | 15.940702 | 5.763309  | 6.422117  |

|   |           |           |           |   |           |           |           |
|---|-----------|-----------|-----------|---|-----------|-----------|-----------|
| C | 14.942787 | 8.877414  | 7.461380  | H | 10.775885 | 6.170858  | 7.085156  |
| C | 12.443010 | 9.071205  | 7.877106  | H | 5.436775  | 9.922300  | 8.639647  |
| C | 11.301099 | 9.907593  | 8.141309  | H | 4.231842  | 17.489498 | 8.555438  |
| C | 9.847315  | 18.235802 | 11.072625 | H | 5.471498  | 19.036499 | 9.992790  |
| C | 8.596085  | 17.791246 | 10.675329 | H | 7.597468  | 19.682819 | 11.081182 |
| C | 7.500048  | 9.682610  | 8.124972  | H | 12.398575 | 18.907696 | 11.591837 |
| C | 6.406697  | 10.418603 | 8.605119  | H | 14.834647 | 18.641005 | 11.673515 |
| C | 6.585336  | 11.705417 | 9.072091  | H | 18.730726 | 13.336483 | 7.992096  |
| C | 14.926551 | 7.487050  | 7.196921  | H | 19.616379 | 11.417929 | 6.789300  |
| C | 12.203310 | 7.696585  | 7.579274  | H | 4.102522  | 15.342728 | 7.297593  |
| C | 9.812152  | 8.055414  | 7.499786  | H | 5.859032  | 13.629052 | 7.578154  |
| C | 7.241832  | 8.319180  | 7.622028  | H | 9.972013  | 19.272036 | 11.398335 |
| C | 10.928234 | 7.218379  | 7.355820  | H | 20.320524 | 9.451287  | 5.812268  |
| C | 8.475679  | 7.478319  | 7.226845  | H | 13.132185 | 9.917519  | 13.484438 |
| C | 16.025892 | 6.831234  | 6.633988  | H | 13.108122 | 11.075903 | 12.155186 |
| C | 17.293015 | 8.882401  | 6.693592  | H | 17.401871 | 11.423304 | 12.530494 |
| C | 17.191483 | 7.524084  | 6.350737  | H | 17.453917 | 9.998241  | 11.446071 |
| C | 18.527769 | 9.592731  | 6.493039  | H | 17.291731 | 11.656337 | 10.746665 |
| C | 18.667221 | 10.888683 | 6.912697  | H | 11.363327 | 8.082677  | 10.686897 |
| C | 6.151094  | 17.044159 | 9.430018  | H | 11.312497 | 8.307229  | 12.463552 |
| C | 7.471663  | 18.687519 | 10.649296 | H | 11.067835 | 9.710256  | 11.418531 |
| C | 6.305286  | 18.332926 | 10.049183 |   |           |           |           |

PGc-MAA-enol

|   |           |           |           |   |           |           |           |
|---|-----------|-----------|-----------|---|-----------|-----------|-----------|
| C | 11.294407 | 11.125283 | 10.006198 | C | 7.910711  | 11.255235 | 8.398607  |
| C | 11.463097 | 12.524766 | 10.362551 | C | 6.922241  | 13.433075 | 8.741778  |
| C | 12.749343 | 13.105085 | 10.674364 | C | 6.892306  | 12.167907 | 8.154065  |
| C | 13.944307 | 12.359904 | 10.650976 | C | 15.428103 | 6.121850  | 11.892381 |
| C | 12.395285 | 10.218096 | 10.012132 | C | 14.188196 | 5.401128  | 11.931440 |
| C | 15.129356 | 10.039161 | 9.799508  | C | 13.022765 | 6.039574  | 12.278008 |
| C | 12.356616 | 8.946288  | 9.441739  | C | 11.701040 | 5.347998  | 12.329501 |
| C | 15.227464 | 12.922687 | 10.625705 | C | 17.779102 | 6.012121  | 11.441927 |
| C | 16.325901 | 10.757337 | 9.709085  | O | 18.990456 | 14.649076 | 11.008859 |
| C | 16.411182 | 12.158523 | 10.237164 | O | 5.318471  | 10.091502 | 10.849537 |
| C | 9.894820  | 9.205496  | 9.436119  | O | 13.936689 | 10.142319 | 12.288505 |
| C | 10.039859 | 10.637786 | 9.569740  | O | 20.207891 | 12.001366 | 10.580942 |
| C | 17.432253 | 10.072290 | 9.060026  | O | 19.553228 | 13.247604 | 8.370777  |
| C | 17.266630 | 8.723605  | 8.592571  | O | 7.640087  | 9.227967  | 10.231148 |
| C | 12.862526 | 14.516491 | 10.940130 | O | 6.004250  | 7.564006  | 11.057442 |
| C | 15.319237 | 14.327438 | 10.940027 | O | 5.646517  | 8.540121  | 8.786015  |
| C | 14.142282 | 15.066695 | 11.129149 | O | 16.170626 | 3.185622  | 9.788607  |
| C | 10.342217 | 13.385962 | 10.278567 | O | 15.591973 | 2.219059  | 7.503392  |
| C | 9.115608  | 12.924583 | 9.699195  | O | 10.581722 | 2.977372  | 8.012125  |
| C | 8.994458  | 11.579647 | 9.241048  | O | 8.328214  | 4.479855  | 8.574358  |
| C | 17.621550 | 12.862070 | 10.280246 | O | 21.513359 | 6.121638  | 5.939250  |
| C | 16.595068 | 14.926505 | 11.097670 | O | 15.593807 | 7.312750  | 12.184663 |
| C | 17.711166 | 14.183598 | 10.822334 | O | 12.944588 | 7.332462  | 12.593331 |
| C | 18.705048 | 10.674669 | 8.868591  | O | 16.495285 | 5.344642  | 11.464466 |
| C | 19.728376 | 10.045269 | 8.184808  | P | 6.060914  | 8.960592  | 10.283136 |
| C | 19.582909 | 8.736779  | 7.700913  | P | 13.863259 | 10.629874 | 10.877632 |
| C | 18.354824 | 8.054926  | 7.949840  | P | 19.106480 | 12.312675 | 9.434196  |
| C | 18.248808 | 6.684604  | 7.565966  | P | 15.802668 | 3.478422  | 8.251301  |
| C | 14.887449 | 8.743407  | 9.235271  | H | 20.510509 | 12.841884 | 10.980874 |

|   |           |           |           |   |           |           |           |
|---|-----------|-----------|-----------|---|-----------|-----------|-----------|
| C | 13.571808 | 8.178296  | 9.168274  | H | 5.129400  | 7.397035  | 11.454964 |
| C | 11.056868 | 8.387415  | 9.216376  | H | 5.229569  | 9.295707  | 8.330763  |
| C | 10.934525 | 7.007288  | 8.920702  | H | 16.270916 | 3.981485  | 10.378190 |
| C | 12.131216 | 6.212904  | 8.687584  | H | 18.977482 | 15.607707 | 11.182622 |
| C | 16.013086 | 8.021317  | 8.720466  | H | 20.125492 | 4.191849  | 6.099296  |
| C | 15.896402 | 6.647506  | 8.375245  | H | 18.132820 | 2.850424  | 6.817456  |
| C | 17.066235 | 5.939656  | 7.868819  | H | 13.047706 | 2.982474  | 8.059978  |
| C | 14.602060 | 6.020671  | 8.482014  | H | 7.581680  | 6.651691  | 9.424772  |
| C | 13.434334 | 6.817352  | 8.761417  | H | 6.102111  | 14.136564 | 8.582826  |
| C | 11.693012 | 15.308535 | 10.985665 | H | 7.278083  | 15.840939 | 9.898800  |
| C | 10.456038 | 14.782052 | 10.647638 | H | 9.382091  | 16.657129 | 10.914774 |
| C | 9.649014  | 6.428864  | 8.920601  | H | 14.224670 | 16.125132 | 11.390618 |
| C | 8.531256  | 7.176120  | 9.318825  | H | 16.672247 | 15.964408 | 11.433378 |
| C | 8.659529  | 8.516889  | 9.620315  | H | 20.673031 | 10.572016 | 8.026778  |
| C | 17.101099 | 4.543019  | 7.638107  | H | 21.557703 | 8.668139  | 6.802926  |
| C | 14.420464 | 4.617247  | 8.295735  | H | 6.064730  | 11.897733 | 7.494384  |
| C | 12.012444 | 4.840230  | 8.400718  | H | 7.887168  | 10.277725 | 7.915363  |
| C | 9.438963  | 5.004134  | 8.599984  | H | 11.778289 | 16.372026 | 11.224442 |
| C | 13.161464 | 4.054729  | 8.236555  | H | 22.267555 | 6.720339  | 5.787228  |
| C | 10.698791 | 4.164410  | 8.301691  | H | 14.166469 | 4.345319  | 11.670874 |
| C | 18.184023 | 3.925722  | 7.001760  | H | 13.851709 | 7.757933  | 12.539245 |
| C | 19.349972 | 6.033624  | 6.919453  | H | 11.777257 | 4.306372  | 11.996929 |
| C | 19.288038 | 4.664264  | 6.611586  | H | 11.307691 | 5.373104  | 13.357351 |
| C | 20.531378 | 6.793828  | 6.610661  | H | 10.976176 | 5.883089  | 11.697122 |
| C | 20.645315 | 8.099595  | 7.004373  | H | 17.729681 | 6.923630  | 10.832163 |
| C | 8.036314  | 13.839655 | 9.488387  | H | 18.082705 | 6.277035  | 12.463377 |
| C | 9.294725  | 15.626375 | 10.563841 | H | 18.475174 | 5.288034  | 11.003965 |
| C | 8.140406  | 15.178448 | 10.003658 |   |           |           |           |

PGc-DMM-keto

|   |           |           |           |   |           |           |           |
|---|-----------|-----------|-----------|---|-----------|-----------|-----------|
| C | 6.367886  | 11.253309 | 9.565232  | C | 2.629158  | 11.110344 | 8.818461  |
| C | 6.541238  | 12.673401 | 9.930806  | C | 1.813629  | 13.165395 | 9.839822  |
| C | 7.863398  | 13.316428 | 9.961861  | C | 1.698801  | 12.137534 | 9.213548  |
| C | 9.088773  | 12.577882 | 9.966525  | C | 8.947648  | 5.923378  | 12.289345 |
| C | 7.489424  | 10.366164 | 9.487946  | C | 9.987770  | 6.809681  | 12.480047 |
| C | 10.286533 | 10.148995 | 9.348508  | C | 11.405882 | 6.517437  | 12.339936 |
| C | 7.446423  | 9.070210  | 8.889467  | C | 13.691219 | 7.187283  | 12.925136 |
| C | 10.395791 | 13.145838 | 9.802313  | C | 6.625861  | 5.211769  | 12.631163 |
| C | 11.551917 | 10.840503 | 9.342461  | O | 14.460912 | 11.427679 | 11.498646 |
| C | 11.615973 | 12.290319 | 9.698119  | O | 9.021352  | 10.481648 | 11.959656 |
| C | 4.955699  | 9.057939  | 9.168640  | O | 15.454699 | 12.688649 | 9.660517  |
| C | 5.042029  | 10.722025 | 9.215620  | O | 2.655154  | 8.679532  | 9.989230  |
| C | 12.717331 | 10.081711 | 8.863399  | O | 1.041454  | 7.720386  | 11.532251 |
| C | 12.510170 | 8.761693  | 8.263744  | O | 0.326888  | 7.938009  | 8.886196  |
| C | 8.085867  | 14.736424 | 9.884372  | O | 0.925761  | 9.598412  | 10.488065 |
| C | 10.504013 | 14.608196 | 9.742486  | O | 11.006971 | 2.992470  | 8.521711  |
| C | 9.239608  | 15.289968 | 9.765878  | O | 10.865243 | 2.702734  | 6.276771  |
| C | 5.338681  | 13.437676 | 10.066625 | O | 5.771786  | 3.475542  | 6.955390  |
| C | 4.104430  | 12.881713 | 9.826121  | O | 3.580854  | 4.814439  | 7.078803  |
| C | 3.914406  | 11.599088 | 9.396005  | O | 14.196661 | 15.030643 | 9.913842  |
| C | 12.891027 | 12.972262 | 9.821194  | O | 16.745164 | 6.142596  | 5.865919  |
| C | 11.810401 | 15.175187 | 9.715981  | O | 9.327609  | 4.802304  | 11.924756 |
| C | 12.914738 | 14.382512 | 9.812850  | O | 11.805598 | 5.395986  | 12.015390 |
| C | 14.079601 | 10.571505 | 9.006845  | O | 12.366267 | 7.561842  | 12.585859 |



|              |           |           |           |   |           |           |           |
|--------------|-----------|-----------|-----------|---|-----------|-----------|-----------|
| C            | 15.126552 | 9.801730  | 8.465455  | O | 7.563962  | 6.266185  | 12.493054 |
| C            | 14.944286 | 8.605209  | 7.845956  | P | 8.980842  | 10.835931 | 10.370271 |
| C            | 13.665514 | 8.002199  | 7.726679  | P | 14.464763 | 12.072953 | 9.945025  |
| C            | 13.495367 | 6.786429  | 7.176970  | P | 1.293981  | 8.523654  | 10.101660 |
| C            | 10.040515 | 8.873976  | 8.730278  | P | 10.773649 | 3.685871  | 6.958717  |
| C            | 8.675906  | 8.318443  | 8.588497  | H | 14.779573 | 12.145582 | 12.096549 |
| C            | 6.119362  | 8.548258  | 8.528226  | H | 0.442342  | 7.654785  | 12.068629 |
| C            | 6.082330  | 7.216387  | 8.004146  | H | 0.083768  | 8.266729  | 8.255830  |
| C            | 7.205255  | 6.497583  | 7.775124  | H | 11.104628 | 2.196252  | 8.524686  |
| C            | 11.187825 | 8.167141  | 8.189081  | H | 14.066765 | 15.987947 | 9.903609  |
| C            | 11.002835 | 6.832919  | 7.599193  | H | 15.020923 | 4.334800  | 5.843581  |
| C            | 12.165053 | 6.174566  | 7.100751  | H | 12.916581 | 3.410746  | 5.602174  |
| C            | 9.695131  | 6.302539  | 7.559103  | H | 8.213694  | 3.413828  | 6.840253  |
| C            | 8.532401  | 6.987850  | 7.978367  | H | 2.844483  | 6.909095  | 8.307234  |
| C            | 6.853635  | 15.657921 | 9.947989  | H | 0.937452  | 13.782343 | 9.974317  |
| C            | 5.429948  | 15.055116 | 10.285330 | H | 2.293108  | 15.495279 | 11.034379 |
| C            | 4.801151  | 6.701918  | 8.102611  | H | 4.433476  | 16.569892 | 11.315034 |
| C            | 3.865394  | 7.424047  | 8.637275  | H | 9.260620  | 16.365986 | 9.675636  |
| C            | 3.716931  | 8.637720  | 9.241195  | H | 11.926998 | 16.244404 | 9.618099  |
| C            | 12.032250 | 4.906898  | 6.521630  | H | 16.133370 | 10.183929 | 8.546953  |
| C            | 9.538467  | 5.001074  | 7.067527  | H | 16.876906 | 7.982825  | 8.071067  |
| C            | 7.057603  | 5.186128  | 7.307915  | H | 0.718839  | 11.963462 | 8.794294  |
| C            | 4.681284  | 5.346772  | 7.339906  | H | 2.416902  | 10.336001 | 8.221971  |
| C            | 8.293996  | 4.468949  | 7.056291  | H | 6.961217  | 16.716373 | 9.762229  |
| C            | 5.849478  | 4.697522  | 7.206845  | H | 17.232583 | 6.880230  | 5.476399  |
| C            | 13.013257 | 4.368941  | 6.090964  | H | 9.651141  | 7.397696  | 13.249559 |
| C            | 14.400211 | 6.112652  | 6.712658  | H | 10.291617 | 7.385267  | 11.804690 |
| C            | 14.171620 | 4.901363  | 6.195845  | H | 13.723465 | 6.605761  | 13.855622 |
| C            | 15.696576 | 6.663996  | 6.703897  | H | 14.166707 | 6.605761  | 12.124663 |
| C            | 15.912509 | 7.817145  | 7.614023  | H | 14.241429 | 8.118807  | 13.066026 |
| C            | 2.972779  | 13.679083 | 10.034849 | H | 6.588593  | 4.580870  | 11.733615 |
| C            | 4.364015  | 15.624718 | 10.797132 | H | 6.848845  | 4.580870  | 13.501369 |
| C            | 3.169616  | 14.990115 | 10.656302 | H | 5.654966  | 5.688475  | 12.774100 |
| PGc-DMM-enol |           |           |           |   |           |           |           |
| C            | 11.220520 | 11.106847 | 9.806996  | C | 7.786129  | 11.298357 | 8.306057  |
| C            | 11.405438 | 12.492488 | 10.206182 | C | 6.827892  | 13.475462 | 8.728023  |
| C            | 12.700260 | 13.049933 | 10.524607 | C | 6.766054  | 12.221969 | 8.118046  |
| C            | 13.886298 | 12.292110 | 10.477513 | C | 15.167503 | 5.888760  | 11.491193 |
| C            | 12.315006 | 10.191482 | 9.764265  | C | 15.685997 | 7.148943  | 11.869125 |
| C            | 15.049196 | 9.988397  | 9.546472  | C | 17.045200 | 7.362887  | 11.696826 |
| C            | 12.264761 | 8.947999  | 9.133735  | C | 19.000950 | 8.708644  | 11.833072 |
| C            | 15.176631 | 12.838861 | 10.482588 | C | 13.287550 | 4.436215  | 11.351263 |
| C            | 16.258055 | 10.689997 | 9.507467  | O | 13.841803 | 5.731479  | 11.664360 |
| C            | 16.355049 | 12.069403 | 10.089636 | O | 18.957214 | 14.482615 | 11.016564 |
| C            | 9.804180  | 9.218122  | 9.186834  | O | 5.326378  | 9.985916  | 10.947324 |
| C            | 9.954236  | 10.642302 | 9.381179  | O | 13.861944 | 10.017385 | 12.034427 |
| C            | 17.369884 | 10.007112 | 8.868504  | O | 20.122698 | 11.820431 | 10.562819 |
| C            | 17.197517 | 8.673751  | 8.358973  | O | 19.598631 | 13.158540 | 8.373430  |
| C            | 12.830512 | 14.451721 | 10.831622 | O | 7.587314  | 9.201766  | 10.066023 |
| C            | 15.284206 | 14.230848 | 10.844320 | O | 6.078696  | 7.469495  | 10.985525 |
| C            | 14.115440 | 14.980387 | 11.042008 | O | 5.475047  | 8.522375  | 8.799818  |
| C            | 10.291101 | 13.365604 | 10.164564 | O | 15.783485 | 3.029969  | 9.142862  |
| C            | 9.047116  | 12.929363 | 9.603006  | O | 15.400749 | 2.325908  | 6.720769  |

|   |           |           |           |   |           |           |           |
|---|-----------|-----------|-----------|---|-----------|-----------|-----------|
| C | 8.902428  | 11.596970 | 9.115635  | O | 10.379593 | 3.255702  | 6.952793  |
| C | 17.575253 | 12.749894 | 10.189581 | O | 8.206691  | 4.540850  | 8.118377  |
| C | 16.565111 | 14.804514 | 11.048050 | O | 21.546640 | 6.033851  | 5.915034  |
| C | 17.674498 | 14.050229 | 10.778286 | O | 15.885674 | 4.940770  | 11.016123 |
| C | 18.659634 | 10.591014 | 8.745007  | O | 17.870630 | 6.447276  | 11.215444 |
| C | 19.703657 | 9.954926  | 8.100665  | O | 17.575073 | 8.543072  | 12.015783 |
| C | 19.558754 | 8.657160  | 7.590746  | P | 6.028267  | 8.893810  | 10.264744 |
| C | 18.303646 | 7.997453  | 7.756016  | P | 13.786573 | 10.555194 | 10.640781 |
| C | 18.188896 | 6.641613  | 7.327519  | P | 19.075525 | 12.198554 | 9.377476  |
| C | 14.796462 | 8.718177  | 8.927272  | P | 15.589138 | 3.485533  | 7.621914  |
| C | 13.471903 | 8.180606  | 8.818061  | H | 20.449461 | 12.646021 | 10.975214 |
| C | 10.956941 | 8.413301  | 8.890287  | H | 5.252312  | 7.264821  | 11.461104 |
| C | 10.815602 | 7.061684  | 8.494054  | H | 4.988784  | 9.279850  | 8.423396  |
| C | 12.001094 | 6.283741  | 8.170345  | H | 15.766631 | 3.751265  | 9.840837  |
| C | 15.924435 | 7.994798  | 8.412405  | H | 18.959557 | 15.437101 | 11.211967 |
| C | 15.789966 | 6.642164  | 7.995809  | H | 20.100893 | 4.147627  | 5.908293  |
| C | 16.967812 | 5.922297  | 7.522030  | H | 18.014172 | 2.850383  | 6.400579  |
| C | 14.472029 | 6.052196  | 7.998596  | H | 12.853933 | 3.131903  | 7.166858  |
| C | 13.315176 | 6.853114  | 8.314643  | H | 7.480953  | 6.674881  | 9.090716  |
| C | 11.670799 | 15.255556 | 10.904361 | H | 6.009689  | 14.189234 | 8.610332  |
| C | 10.424906 | 14.750783 | 10.567575 | H | 7.242561  | 15.857752 | 9.912994  |
| C | 9.526734  | 6.489599  | 8.488557  | H | 9.377649  | 16.630980 | 10.895977 |
| C | 8.427834  | 7.204914  | 8.986703  | H | 14.209242 | 16.029181 | 11.336345 |
| C | 8.574344  | 8.521284  | 9.374607  | H | 16.650902 | 15.829180 | 11.420223 |
| C | 16.976730 | 4.538480  | 7.221542  | H | 20.665344 | 10.464795 | 8.000566  |
| C | 14.256463 | 4.681365  | 7.660990  | H | 21.586067 | 8.562316  | 6.822455  |
| C | 11.855127 | 4.962571  | 7.709581  | H | 5.913655  | 11.969099 | 7.483773  |
| C | 9.300392  | 5.097548  | 8.055715  | H | 7.736160  | 10.333044 | 7.801478  |
| C | 12.986754 | 4.172025  | 7.474441  | H | 11.769661 | 16.311069 | 11.171699 |
| C | 10.527054 | 4.339403  | 7.509450  | H | 22.322403 | 6.617983  | 5.829937  |
| C | 18.086742 | 3.912644  | 6.643126  | H | 15.042442 | 7.942827  | 12.244894 |
| C | 19.315332 | 5.981476  | 6.735241  | H | 17.249430 | 5.632158  | 11.035406 |
| C | 19.240334 | 4.626840  | 6.373722  | H | 19.552177 | 8.054052  | 12.522429 |
| C | 20.534647 | 6.715390  | 6.528957  | H | 19.290028 | 8.482074  | 10.798512 |
| C | 20.650801 | 8.010684  | 6.953119  | H | 19.196543 | 9.762100  | 12.054486 |
| C | 7.969536  | 13.857539 | 9.444929  | H | 13.354733 | 4.231063  | 10.274174 |
| C | 9.271643  | 15.608892 | 10.525467 | H | 13.808866 | 3.643581  | 11.905585 |
| C | 8.100111  | 15.184578 | 9.983426  | H | 12.238008 | 4.493994  | 11.658648 |

G-AA-keto

|   |           |           |           |   |           |           |           |
|---|-----------|-----------|-----------|---|-----------|-----------|-----------|
| C | 9.641975  | 10.790727 | 10.119772 | C | 7.444416  | 16.919085 | 10.073684 |
| C | 11.061457 | 10.800160 | 10.153406 | C | 6.794943  | 10.771938 | 10.054039 |
| C | 11.763350 | 12.037333 | 10.184744 | C | 21.707359 | 14.580705 | 10.048144 |
| C | 11.040417 | 13.268920 | 10.171055 | C | 10.986011 | 18.215170 | 10.124533 |
| C | 9.618408  | 13.257033 | 10.132994 | C | 18.099289 | 20.718616 | 10.053278 |
| C | 8.919239  | 12.021425 | 10.111011 | C | 15.977705 | 21.934551 | 10.056993 |
| C | 13.183485 | 12.047312 | 10.212129 | C | 5.337400  | 13.218542 | 10.032123 |
| C | 11.740236 | 14.505076 | 10.184836 | C | 5.307680  | 15.663461 | 10.033011 |
| C | 13.160612 | 14.516184 | 10.212481 | C | 11.066032 | 5.862992  | 10.086452 |
| C | 13.883626 | 13.284383 | 10.224255 | C | 8.944142  | 7.079331  | 10.063918 |
| C | 15.304744 | 13.294841 | 10.209184 | C | 9.702393  | 5.857337  | 10.063305 |
| C | 16.004124 | 14.531293 | 10.190061 | C | 4.638754  | 14.475189 | 10.019027 |
| C | 15.280552 | 15.761631 | 10.186254 | C | 5.364290  | 10.764360 | 10.023021 |
| C | 13.861016 | 15.751779 | 10.196964 | C | 4.671151  | 11.993221 | 10.013651 |

|           |           |           |           |   |           |           |           |
|-----------|-----------|-----------|-----------|---|-----------|-----------|-----------|
| C         | 11.785507 | 9.567465  | 10.149943 | C | 6.813342  | 8.297917  | 10.034381 |
| C         | 13.907925 | 10.813552 | 10.193053 | C | 7.549398  | 7.094117  | 10.036824 |
| C         | 16.029743 | 12.061052 | 10.187008 | C | 5.387034  | 8.322559  | 10.005931 |
| C         | 15.328027 | 10.826211 | 10.183246 | C | 4.691201  | 9.506741  | 10.001004 |
| C         | 13.204393 | 9.578533  | 10.167188 | C | 17.341290 | 21.940569 | 10.042340 |
| C         | 17.426090 | 14.542173 | 10.153407 | C | 21.679508 | 17.034527 | 10.033802 |
| C         | 15.982465 | 16.997639 | 10.150831 | C | 22.373264 | 15.806077 | 10.027395 |
| C         | 13.136706 | 16.984118 | 10.167945 | C | 20.230104 | 19.500584 | 10.037106 |
| C         | 11.015264 | 15.738015 | 10.156775 | C | 22.352446 | 18.292133 | 10.010007 |
| C         | 8.894279  | 14.489301 | 10.114424 | C | 21.656515 | 19.476250 | 10.011757 |
| C         | 9.594462  | 15.723363 | 10.125878 | C | 19.494108 | 20.704254 | 10.032825 |
| C         | 7.495284  | 12.010255 | 10.076618 | C | 11.795699 | 13.435815 | 5.132495  |
| C         | 7.471042  | 14.472873 | 10.080970 | C | 13.050747 | 12.647103 | 5.398954  |
| C         | 13.840013 | 18.218552 | 10.142848 | C | 13.618937 | 12.771362 | 6.815893  |
| C         | 15.258610 | 18.229919 | 10.134466 | C | 14.546474 | 13.991695 | 6.845610  |
| C         | 18.125162 | 15.777515 | 10.123543 | C | 16.004677 | 13.720650 | 6.590282  |
| C         | 17.451178 | 12.075311 | 10.154467 | O | 13.620308 | 11.975334 | 4.547454  |
| C         | 18.150970 | 13.309971 | 10.138631 | O | 14.093497 | 15.117552 | 7.020174  |
| C         | 6.774320  | 13.239880 | 10.064133 | H | 15.891282 | 7.426503  | 10.132729 |
| C         | 11.717167 | 16.971771 | 10.153258 | H | 20.156948 | 9.937862  | 10.089007 |
| C         | 17.401783 | 17.007538 | 10.124001 | H | 18.024281 | 8.680801  | 10.121164 |
| C         | 11.078708 | 8.332018  | 10.119525 | H | 22.289322 | 11.192168 | 10.043232 |
| C         | 8.939204  | 9.552295  | 10.091310 | H | 9.020753  | 19.117226 | 10.083960 |
| C         | 19.574333 | 13.326098 | 10.102453 | H | 11.153702 | 20.371302 | 10.092820 |
| C         | 19.549004 | 15.788566 | 10.089695 | H | 13.288200 | 21.622702 | 10.078166 |
| C         | 20.270460 | 14.559267 | 10.081068 | H | 6.888848  | 17.861095 | 10.057759 |
| C         | 18.104422 | 18.245892 | 10.091639 | H | 13.755915 | 6.174656  | 10.118688 |
| C         | 15.964970 | 19.465408 | 10.102495 | H | 23.498806 | 13.341401 | 10.011451 |
| C         | 7.516591  | 9.543569  | 10.060455 | H | 9.155619  | 4.911276  | 10.042030 |
| C         | 19.526976 | 18.254887 | 10.065024 | H | 3.546293  | 14.457877 | 9.995818  |
| C         | 20.248989 | 17.026745 | 10.063562 | H | 3.577652  | 11.982147 | 9.989510  |
| C         | 15.230396 | 20.705235 | 10.085706 | H | 7.007247  | 6.144252  | 10.015830 |
| C         | 9.662359  | 8.323968  | 10.092752 | H | 4.850330  | 7.370771  | 9.987295  |
| C         | 16.059280 | 9.582294  | 10.158288 | H | 17.887821 | 22.886791 | 10.019423 |
| C         | 13.935553 | 8.335781  | 10.149965 | H | 15.422031 | 22.875534 | 10.045507 |
| C         | 11.813652 | 7.092330  | 10.113156 | H | 23.466812 | 15.817934 | 10.003568 |
| C         | 18.181488 | 10.832005 | 10.132648 | H | 4.756479  | 16.607014 | 10.020758 |
| C         | 15.337944 | 8.369439  | 10.148761 | H | 11.621622 | 4.921881  | 10.084377 |
| C         | 19.601164 | 10.879623 | 10.102280 | H | 3.598601  | 9.500943  | 9.979186  |
| C         | 20.300007 | 12.081017 | 10.087105 | H | 22.193283 | 20.427937 | 9.992257  |
| C         | 17.469835 | 9.623167  | 10.138515 | H | 23.445023 | 18.297802 | 9.988728  |
| C         | 13.203396 | 7.118422  | 10.128116 | H | 20.036293 | 21.654003 | 10.009811 |
| C         | 21.737755 | 12.135609 | 10.054272 | H | 11.548173 | 13.423851 | 4.065002  |
| C         | 22.406231 | 13.324118 | 10.036594 | H | 10.964605 | 13.002309 | 5.712999  |
| C         | 13.109380 | 19.461372 | 10.117898 | H | 11.923523 | 14.467910 | 5.497786  |
| C         | 8.864057  | 16.966251 | 10.101766 | H | 16.110559 | 13.158417 | 5.647677  |
| C         | 6.745365  | 15.717836 | 10.063168 | H | 16.569706 | 14.658630 | 6.548576  |
| C         | 9.575527  | 18.175091 | 10.103903 | H | 16.408794 | 13.074225 | 7.385783  |
| C         | 11.706928 | 19.428173 | 10.112869 | H | 14.168327 | 11.852365 | 7.056540  |
| C         | 13.840776 | 20.679075 | 10.094110 | H | 12.809632 | 12.944272 | 7.536611  |
| C         | 17.381285 | 19.474098 | 10.084075 |   |           |           |           |
| G-AA-enol |           |           |           |   |           |           |           |

|   |           |           |           |   |           |           |           |
|---|-----------|-----------|-----------|---|-----------|-----------|-----------|
| C | 9.672896  | 10.781383 | 10.046149 | C | 7.504933  | 16.917770 | 9.923695  |
| C | 11.092208 | 10.784935 | 10.093466 | C | 6.826418  | 10.774866 | 9.956508  |
| C | 11.799324 | 12.019043 | 10.124035 | C | 21.757105 | 14.516552 | 10.141542 |
| C | 11.082323 | 13.252691 | 10.095466 | C | 11.052062 | 18.196939 | 9.992984  |
| C | 9.661180  | 13.247078 | 10.043223 | C | 18.176798 | 20.669569 | 10.011438 |
| C | 8.955992  | 12.015125 | 10.023549 | C | 16.060558 | 21.894247 | 9.965254  |
| C | 13.219325 | 12.022505 | 10.161323 | C | 5.380078  | 13.227471 | 9.905674  |
| C | 11.787505 | 14.484659 | 10.105000 | C | 5.361968  | 15.672258 | 9.883207  |
| C | 13.207366 | 14.489481 | 10.148837 | C | 11.075073 | 5.847320  | 10.031034 |
| C | 13.925106 | 13.255432 | 10.178790 | C | 8.958756  | 7.072977  | 9.996267  |
| C | 15.345703 | 13.259305 | 10.195531 | C | 9.711537  | 5.847713  | 10.001783 |
| C | 16.051033 | 14.491872 | 10.188700 | C | 4.687410  | 14.487167 | 9.876387  |
| C | 15.333370 | 15.725555 | 10.156810 | C | 5.396013  | 10.773417 | 9.914657  |
| C | 13.913733 | 15.721816 | 10.136638 | C | 4.708193  | 12.005116 | 9.891915  |
| C | 11.810565 | 9.548792  | 10.097261 | C | 6.833823  | 8.300746  | 9.949499  |
| C | 13.938581 | 10.785332 | 10.158232 | C | 7.564351  | 7.093703  | 9.961284  |
| C | 16.065435 | 12.023036 | 10.189734 | C | 5.407956  | 8.331416  | 9.911232  |
| C | 15.358649 | 10.791329 | 10.171153 | C | 4.717502  | 9.518631  | 9.895062  |
| C | 13.229580 | 9.553412  | 10.126733 | C | 17.424307 | 21.894474 | 9.973305  |
| C | 17.473894 | 14.496883 | 10.183201 | C | 21.741137 | 16.970148 | 10.095843 |
| C | 16.041506 | 16.958292 | 10.120925 | C | 22.429150 | 15.738600 | 10.116055 |
| C | 13.195709 | 16.957224 | 10.082451 | C | 20.302383 | 19.442432 | 10.043515 |
| C | 11.069141 | 15.720009 | 10.055877 | C | 22.419678 | 18.224669 | 10.063298 |
| C | 8.942616  | 14.481805 | 10.005581 | C | 21.728901 | 19.411602 | 10.038327 |
| C | 9.648685  | 15.712221 | 10.010054 | C | 19.571739 | 20.649141 | 10.012383 |
| C | 7.532327  | 12.009943 | 9.976593  | C | 12.611726 | 11.247283 | 6.671137  |
| C | 7.519538  | 14.472003 | 9.959600  | C | 13.215553 | 12.623855 | 6.736393  |
| C | 13.905064 | 18.188314 | 10.056608 | C | 14.632814 | 12.795266 | 6.694582  |
| C | 15.323618 | 18.193562 | 10.074616 | C | 15.168988 | 14.074471 | 6.706042  |
| C | 18.179367 | 15.728890 | 10.152194 | C | 16.630140 | 14.370897 | 6.636252  |
| C | 17.487032 | 12.030581 | 10.186610 | O | 12.436934 | 13.631759 | 6.804924  |
| C | 18.193155 | 13.261682 | 10.184901 | O | 14.378520 | 15.132997 | 6.768030  |
| C | 6.816826  | 13.242354 | 9.948545  | H | 15.906910 | 7.388727  | 10.124620 |
| C | 11.776612 | 16.950680 | 10.046419 | H | 20.183756 | 9.880639  | 10.172009 |
| C | 17.461580 | 16.962145 | 10.121728 | H | 18.045780 | 8.632971  | 10.155253 |
| C | 11.098442 | 8.316511  | 10.062027 | H | 22.322929 | 11.125653 | 10.169927 |
| C | 8.964652  | 9.546026  | 10.016494 | H | 9.092321  | 19.108067 | 9.916411  |
| C | 19.617067 | 13.271709 | 10.172345 | H | 11.229797 | 20.351585 | 9.936687  |
| C | 19.603958 | 15.733930 | 10.138728 | H | 13.369653 | 21.593740 | 9.943243  |
| C | 20.319715 | 14.501450 | 10.153525 | H | 6.954575  | 17.862381 | 9.891094  |
| C | 18.170547 | 18.197006 | 10.083412 | H | 13.765944 | 6.146755  | 10.084176 |
| C | 16.036316 | 19.425550 | 10.040608 | H | 23.542925 | 13.269015 | 10.145686 |
| C | 7.542355  | 9.543366  | 9.974772  | H | 9.160559  | 4.904047  | 9.979945  |
| C | 19.593531 | 18.199848 | 10.079053 | H | 3.595006  | 14.474955 | 9.846117  |
| C | 20.310106 | 16.968660 | 10.105619 | H | 3.614751  | 11.998528 | 9.859763  |
| C | 15.307615 | 20.668385 | 9.995711  | H | 7.018154  | 6.146124  | 9.940077  |
| C | 9.682210  | 8.314513  | 10.026461 | H | 4.867252  | 7.381883  | 9.893679  |
| C | 16.084375 | 9.543828  | 10.157328 | H | 17.975607 | 22.837830 | 9.948565  |
| C | 13.955273 | 8.307212  | 10.116683 | H | 15.508870 | 22.837091 | 9.933477  |
| C | 11.827946 | 7.073394  | 10.061196 | H | 23.522993 | 15.744594 | 10.108041 |
| C | 18.211964 | 10.783745 | 10.176687 | H | 4.815363  | 16.618223 | 9.858128  |
| C | 15.357762 | 8.334286  | 10.133349 | H | 11.626497 | 4.903795  | 10.032037 |
| C | 19.632267 | 10.825177 | 10.175283 | H | 3.625032  | 9.517500  | 9.864764  |
| C | 20.337132 | 12.023349 | 10.173009 | H | 22.269844 | 20.360828 | 10.012048 |
| C | 17.495188 | 9.577790  | 10.164288 | H | 23.512543 | 18.225603 | 10.057293 |

|   |           |           |           |   |           |           |          |
|---|-----------|-----------|-----------|---|-----------|-----------|----------|
| C | 13.217667 | 7.093202  | 10.087176 | H | 20.118383 | 21.596304 | 9.985490 |
| C | 21.775545 | 12.071550 | 10.165996 | H | 15.292548 | 11.930200 | 6.665157 |
| C | 22.450090 | 13.256798 | 10.152298 | H | 13.395929 | 14.709605 | 6.797417 |
| C | 13.180630 | 19.433847 | 10.004803 | H | 17.232977 | 13.469858 | 6.802711 |
| C | 8.924641  | 16.957983 | 9.963276  | H | 16.874975 | 14.786820 | 5.645791 |
| C | 6.799752  | 15.720014 | 9.922624  | H | 16.895241 | 15.133230 | 7.382409 |
| C | 9.641850  | 18.163486 | 9.955954  | H | 11.628440 | 11.247249 | 7.157516 |
| C | 11.778509 | 19.406540 | 9.976995  | H | 12.469051 | 10.967228 | 5.614523 |
| C | 13.917873 | 20.648018 | 9.979815  | H | 13.261259 | 10.492490 | 7.135056 |
| C | 17.452961 | 19.428175 | 10.046814 |   |           |           |          |

G-CF<sub>3</sub>\_DK-Keto

|   |           |           |           |   |           |           |           |
|---|-----------|-----------|-----------|---|-----------|-----------|-----------|
| C | 9.699382  | 10.782447 | 9.971450  | C | 7.504990  | 16.908258 | 9.768831  |
| C | 11.118926 | 10.790442 | 9.961640  | C | 6.852330  | 10.766138 | 9.999471  |
| C | 11.821447 | 12.025396 | 9.895474  | C | 21.766947 | 14.570283 | 10.055619 |
| C | 11.099129 | 13.256086 | 9.837158  | C | 11.047794 | 18.200758 | 9.735178  |
| C | 9.676727  | 13.245890 | 9.856817  | C | 18.159466 | 20.706829 | 9.878191  |
| C | 8.977114  | 12.012123 | 9.921121  | C | 16.037924 | 21.921911 | 9.813771  |
| C | 13.242604 | 12.034422 | 9.906403  | C | 5.395384  | 13.211725 | 9.912626  |
| C | 11.799497 | 14.491388 | 9.788444  | C | 5.366428  | 15.655252 | 9.824251  |
| C | 13.221026 | 14.501951 | 9.801409  | C | 11.120310 | 5.859244  | 10.201660 |
| C | 13.944487 | 13.270442 | 9.860571  | C | 8.999378  | 7.075808  | 10.151553 |
| C | 15.365673 | 13.281061 | 9.896379  | C | 9.756652  | 5.854486  | 10.204484 |
| C | 16.065228 | 14.517524 | 9.878147  | C | 4.697169  | 14.468073 | 9.872452  |
| C | 15.341888 | 15.747900 | 9.828692  | C | 5.421540  | 10.759708 | 10.013218 |
| C | 13.922029 | 15.738307 | 9.789056  | C | 4.728571  | 11.987880 | 9.968795  |
| C | 11.842413 | 9.559286  | 10.025018 | C | 6.869353  | 8.294689  | 10.109157 |
| C | 13.966809 | 10.801928 | 9.976963  | C | 7.604539  | 7.091517  | 10.158722 |
| C | 16.089437 | 12.048414 | 9.961216  | C | 5.442871  | 8.320244  | 10.118534 |
| C | 15.386735 | 10.814785 | 9.997294  | C | 4.747622  | 9.503884  | 10.072837 |
| C | 13.261483 | 9.569165  | 10.030330 | C | 17.401169 | 21.928406 | 9.850619  |
| C | 17.486881 | 14.529421 | 9.924953  | C | 21.739553 | 17.024181 | 10.020166 |
| C | 16.043625 | 16.984770 | 9.838100  | C | 22.432949 | 15.795945 | 10.057528 |
| C | 13.197192 | 16.970783 | 9.762563  | C | 20.290075 | 19.489738 | 9.950282  |
| C | 11.075739 | 15.724669 | 9.763878  | C | 22.411940 | 18.282354 | 10.027411 |
| C | 8.953341  | 14.478263 | 9.821836  | C | 21.716040 | 19.466070 | 9.994267  |
| C | 9.654693  | 15.710936 | 9.777168  | C | 19.553837 | 20.692989 | 9.919271  |
| C | 7.553115  | 12.002576 | 9.938389  | C | 14.504244 | 15.172955 | 13.389380 |
| C | 7.529622  | 14.463412 | 9.841393  | C | 13.016783 | 15.211720 | 13.176491 |
| C | 13.900757 | 18.204994 | 9.772223  | C | 12.287709 | 13.869809 | 13.102109 |
| C | 15.319120 | 18.216732 | 9.808596  | C | 12.216007 | 13.103037 | 14.396404 |
| C | 18.185881 | 15.765240 | 9.924442  | C | 11.292976 | 11.838457 | 14.324991 |
| C | 17.510355 | 12.063505 | 9.995141  | O | 12.381971 | 16.250593 | 13.051391 |
| C | 18.210531 | 13.297699 | 9.977595  | O | 12.797747 | 13.360435 | 15.431432 |
| C | 6.832564  | 13.231716 | 9.895800  | H | 15.946874 | 7.418046  | 10.150862 |
| C | 11.778290 | 16.957701 | 9.747716  | H | 20.214830 | 9.928107  | 10.122976 |
| C | 17.462820 | 16.994938 | 9.884445  | H | 18.082167 | 8.671129  | 10.127617 |
| C | 11.134702 | 8.325838  | 10.086143 | H | 22.346920 | 11.182189 | 10.136459 |
| C | 8.995937  | 9.546109  | 10.036662 | H | 9.083682  | 19.104496 | 9.723829  |
| C | 19.633583 | 13.314940 | 10.018040 | H | 11.214584 | 20.356495 | 9.725412  |
| C | 19.609434 | 15.777120 | 9.969889  | H | 13.348337 | 21.608929 | 9.752459  |
| C | 20.330256 | 14.548193 | 10.012986 | H | 6.950514  | 17.850758 | 9.750252  |
| C | 18.165234 | 18.233780 | 9.895067  | H | 13.809900 | 6.168571  | 10.192939 |
| C | 16.025682 | 19.452694 | 9.823318  | H | 23.557302 | 13.331185 | 10.126628 |

|   |           |           |           |   |           |           |           |
|---|-----------|-----------|-----------|---|-----------|-----------|-----------|
| C | 7.573368  | 9.538534  | 10.047870 | H | 9.209444  | 4.909489  | 10.248724 |
| C | 19.587456 | 18.243446 | 9.939471  | H | 3.604442  | 14.451268 | 9.883673  |
| C | 20.309351 | 17.015652 | 9.975230  | H | 3.634789  | 11.977493 | 9.980968  |
| C | 15.290872 | 20.692291 | 9.799238  | H | 7.061940  | 6.142850  | 10.205848 |
| C | 9.718306  | 8.318695  | 10.090453 | H | 4.905623  | 7.369655  | 10.163910 |
| C | 16.117117 | 9.571704  | 10.061177 | H | 17.947437 | 22.874979 | 9.861471  |
| C | 13.991806 | 8.327521  | 10.093907 | H | 15.482279 | 22.862761 | 9.794713  |
| C | 11.868742 | 7.086979  | 10.144970 | H | 23.526249 | 15.808268 | 10.091606 |
| C | 18.239719 | 10.821040 | 10.053106 | H | 4.815254  | 16.598438 | 9.796625  |
| C | 15.394358 | 8.360479  | 10.103915 | H | 11.674857 | 4.918530  | 10.243616 |
| C | 19.659246 | 10.869231 | 10.082852 | H | 3.654881  | 9.498963  | 10.082211 |
| C | 20.358469 | 12.070426 | 10.067395 | H | 22.252422 | 20.418171 | 10.001862 |
| C | 17.527681 | 9.612638  | 10.082253 | H | 23.504274 | 18.288641 | 10.061335 |
| C | 13.258518 | 7.111953  | 10.146807 | H | 20.095558 | 21.643221 | 9.929220  |
| C | 21.796009 | 12.125488 | 10.102957 | H | 14.923942 | 16.183046 | 13.324693 |
| C | 22.464996 | 13.313813 | 10.097409 | H | 14.709834 | 14.738838 | 14.381459 |
| C | 13.170248 | 19.447580 | 9.754821  | H | 14.983013 | 14.516531 | 12.645192 |
| C | 8.924932  | 16.953922 | 9.756970  | H | 12.785559 | 13.206347 | 12.370398 |
| C | 6.804466  | 15.708373 | 9.808953  | H | 11.265755 | 14.031631 | 12.725911 |
| C | 9.637493  | 18.161730 | 9.733545  | F | 11.790080 | 10.964662 | 13.395983 |
| C | 11.768311 | 19.413630 | 9.733850  | F | 10.029778 | 12.180993 | 13.933282 |
| C | 13.901406 | 20.665512 | 9.766287  | F | 11.210656 | 11.198916 | 15.505870 |
| C | 17.441751 | 19.461683 | 9.864197  |   |           |           |           |

G-CF<sub>3</sub>\_DK-enol

|   |           |           |           |   |           |           |           |
|---|-----------|-----------|-----------|---|-----------|-----------|-----------|
| C | 9.624802  | 10.774407 | 10.146035 | C | 7.464007  | 16.915470 | 10.095064 |
| C | 11.044427 | 10.776035 | 10.165320 | C | 6.777209  | 10.772568 | 10.070462 |
| C | 11.753472 | 12.007866 | 10.204101 | C | 21.712101 | 14.492912 | 10.057202 |
| C | 11.037469 | 13.243118 | 10.220187 | C | 11.012859 | 18.190960 | 10.150885 |
| C | 9.615139  | 13.240104 | 10.195441 | C | 18.140507 | 20.652252 | 10.069554 |
| C | 8.908618  | 12.008867 | 10.158891 | C | 16.026005 | 21.880579 | 10.064616 |
| C | 13.173331 | 12.009805 | 10.199389 | C | 5.334474  | 13.227801 | 10.044161 |
| C | 11.744349 | 14.475293 | 10.229134 | C | 5.320080  | 15.672837 | 10.038856 |
| C | 13.165275 | 14.477524 | 10.230955 | C | 11.019815 | 5.840506  | 10.016994 |
| C | 13.881595 | 13.241663 | 10.215818 | C | 8.905290  | 7.068541  | 10.032122 |
| C | 15.302290 | 13.244294 | 10.195320 | C | 9.656201  | 5.842367  | 10.007032 |
| C | 16.009230 | 14.475992 | 10.195520 | C | 4.643948  | 14.488712 | 10.020217 |
| C | 15.293684 | 15.710898 | 10.208914 | C | 5.346835  | 10.773668 | 10.026630 |
| C | 13.873387 | 15.709693 | 10.221722 | C | 4.661083  | 12.006614 | 10.015950 |
| C | 11.760865 | 9.539781  | 10.130665 | C | 6.781522  | 8.299063  | 10.023787 |
| C | 13.890554 | 10.772664 | 10.160076 | C | 7.510551  | 7.091199  | 10.010707 |
| C | 16.019590 | 12.007057 | 10.160658 | C | 5.355418  | 8.332264  | 9.989755  |
| C | 15.310398 | 10.777146 | 10.143532 | C | 4.666493  | 9.520415  | 9.990400  |
| C | 13.179414 | 9.542677  | 10.129358 | C | 17.389605 | 21.878532 | 10.050558 |
| C | 17.431026 | 14.479044 | 10.161881 | C | 21.698950 | 16.946955 | 10.054125 |
| C | 16.002413 | 16.943312 | 10.180430 | C | 22.385456 | 15.714390 | 10.042572 |
| C | 13.156033 | 16.947409 | 10.201430 | C | 20.263908 | 19.421509 | 10.057419 |
| C | 11.027193 | 15.712834 | 10.204875 | C | 22.379118 | 18.200710 | 10.029729 |
| C | 8.898124  | 14.476766 | 10.171767 | C | 21.689999 | 19.388823 | 10.030817 |
| C | 9.605820  | 15.706926 | 10.175039 | C | 19.535089 | 20.629633 | 10.048920 |
| C | 7.484749  | 12.006391 | 10.111587 | C | 9.683662  | 13.268528 | 6.743525  |
| C | 7.474957  | 14.469060 | 10.120905 | C | 11.181959 | 13.301031 | 6.740649  |
| C | 13.866924 | 18.177509 | 10.172227 | C | 11.889137 | 14.545912 | 6.671626  |
| C | 15.285741 | 18.179930 | 10.163581 | C | 13.263961 | 14.493742 | 6.586499  |

|   |           |           |           |   |           |           |           |
|---|-----------|-----------|-----------|---|-----------|-----------|-----------|
| C | 18.137434 | 15.710279 | 10.144402 | C | 14.112005 | 15.750379 | 6.408646  |
| C | 17.440685 | 12.012756 | 10.133780 | O | 11.828306 | 12.201151 | 6.763118  |
| C | 18.148060 | 13.242847 | 10.134958 | O | 13.939719 | 13.372867 | 6.597326  |
| C | 6.771024  | 13.240345 | 10.095175 | H | 15.852692 | 7.375288  | 10.045958 |
| C | 11.736304 | 16.943085 | 10.189740 | H | 20.133490 | 9.859003  | 10.042487 |
| C | 17.421747 | 16.944717 | 10.151363 | H | 17.993349 | 8.615477  | 10.051190 |
| C | 11.046926 | 8.308957  | 10.089554 | H | 22.273729 | 11.101376 | 10.019737 |
| C | 8.914661  | 9.540803  | 10.098623 | H | 9.053325  | 19.104074 | 10.094460 |
| C | 19.571375 | 13.250638 | 10.101007 | H | 11.193158 | 20.345198 | 10.102693 |
| C | 19.561214 | 15.713217 | 10.109298 | H | 13.334822 | 21.584129 | 10.086521 |
| C | 20.275223 | 14.479756 | 10.091364 | H | 6.914670  | 17.860807 | 10.065921 |
| C | 18.131453 | 18.178976 | 10.118124 | H | 13.710622 | 6.136696  | 10.025897 |
| C | 15.999376 | 19.411324 | 10.126082 | H | 23.496183 | 13.243210 | 10.010427 |
| C | 7.491985  | 9.540263  | 10.067279 | H | 9.104197  | 4.899659  | 9.975997  |
| C | 19.553864 | 18.179762 | 10.089243 | H | 3.551779  | 14.478567 | 9.982759  |
| C | 20.268505 | 16.947363 | 10.086492 | H | 3.567950  | 12.002113 | 9.979652  |
| C | 15.271946 | 20.655460 | 10.101586 | H | 6.963070  | 6.144700  | 9.977216  |
| C | 9.630627  | 8.308580  | 10.075942 | H | 4.813187  | 7.383908  | 9.959633  |
| C | 16.034004 | 9.529625  | 10.102029 | H | 17.941988 | 22.821108 | 10.020569 |
| C | 13.902814 | 8.296332  | 10.088561 | H | 15.475525 | 22.824404 | 10.045416 |
| C | 11.774187 | 7.065265  | 10.055239 | H | 23.479013 | 15.719558 | 10.016761 |
| C | 18.163591 | 10.765475 | 10.096214 | H | 4.775151  | 16.619869 | 10.014951 |
| C | 15.305343 | 8.321432  | 10.078270 | H | 11.570212 | 4.896699  | 9.993320  |
| C | 19.583612 | 10.804153 | 10.069223 | H | 3.574063  | 9.521318  | 9.960792  |
| C | 20.289810 | 12.001438 | 10.071433 | H | 22.231998 | 20.337542 | 10.008443 |
| C | 17.444733 | 9.560891  | 10.082708 | H | 23.471746 | 18.200203 | 10.007222 |
| C | 13.163931 | 7.083428  | 10.055819 | H | 20.082592 | 21.576305 | 10.021038 |
| C | 21.727831 | 12.047911 | 10.040775 | H | 9.326026  | 12.339523 | 7.203648  |
| C | 22.403561 | 13.232388 | 10.035074 | H | 11.364261 | 15.497217 | 6.681240  |
| C | 13.143508 | 19.424318 | 10.139437 | H | 9.261037  | 14.137804 | 7.264999  |
| C | 8.883598  | 16.954514 | 10.134031 | H | 9.327466  | 13.296988 | 5.700363  |
| C | 6.757558  | 15.718566 | 10.086528 | H | 13.127253 | 12.624762 | 6.683276  |
| C | 9.602347  | 18.158901 | 10.126484 | F | 13.459603 | 16.860811 | 6.853592  |
| C | 11.740999 | 19.399229 | 10.131224 | F | 15.290299 | 15.659176 | 7.070715  |
| C | 13.882092 | 20.637457 | 10.108849 | F | 14.396877 | 15.948833 | 5.086768  |
| C | 17.415649 | 19.411581 | 10.107204 |   |           |           |           |

G-MAA-keto

|   |           |           |           |   |           |           |           |
|---|-----------|-----------|-----------|---|-----------|-----------|-----------|
| C | 9.647191  | 10.770162 | 10.051548 | C | 7.476909  | 16.905399 | 9.896143  |
| C | 11.066914 | 10.774045 | 10.090160 | C | 6.800581  | 10.762631 | 9.967502  |
| C | 11.773536 | 12.008799 | 10.113438 | C | 21.729971 | 14.514690 | 10.095884 |
| C | 11.055753 | 13.243119 | 10.088636 | C | 11.023074 | 18.185446 | 9.938966  |
| C | 9.633873  | 13.236506 | 10.045702 | C | 18.144062 | 20.664024 | 9.945425  |
| C | 8.929525  | 12.003814 | 10.030523 | C | 16.026932 | 21.886835 | 9.897627  |
| C | 13.194422 | 12.012944 | 10.144809 | C | 5.353463  | 13.214778 | 9.905803  |
| C | 11.760871 | 14.475592 | 10.079195 | C | 5.334402  | 15.659307 | 9.868100  |
| C | 13.181177 | 14.481329 | 10.109407 | C | 11.051132 | 5.836943  | 10.066902 |
| C | 13.899838 | 13.247559 | 10.148111 | C | 8.934441  | 7.061775  | 10.023268 |
| C | 15.321082 | 13.252237 | 10.163753 | C | 9.687628  | 5.836838  | 10.036689 |
| C | 16.025007 | 14.485230 | 10.132797 | C | 4.660289  | 14.473984 | 9.869269  |
| C | 15.306199 | 15.717722 | 10.090363 | C | 5.370202  | 10.760694 | 9.926004  |
| C | 13.886707 | 15.713449 | 10.078718 | C | 4.682157  | 11.992118 | 9.897951  |
| C | 11.786226 | 9.538348  | 10.100880 | C | 6.808732  | 8.288744  | 9.972103  |
| C | 13.914222 | 10.775661 | 10.153816 | C | 7.539803  | 7.082125  | 9.989887  |



|            |           |           |           |   |           |           |           |
|------------|-----------|-----------|-----------|---|-----------|-----------|-----------|
| C          | 16.041264 | 12.015532 | 10.179517 | C | 5.382786  | 8.318867  | 9.934107  |
| C          | 15.334677 | 10.782825 | 10.173865 | C | 4.691992  | 9.505733  | 9.912178  |
| C          | 13.205068 | 9.543548  | 10.132181 | C | 17.390533 | 21.888340 | 9.907755  |
| C          | 17.447376 | 14.490995 | 10.124915 | C | 21.711441 | 16.968252 | 10.041306 |
| C          | 16.013161 | 16.950815 | 10.049588 | C | 22.400675 | 15.737411 | 10.066089 |
| C          | 13.167396 | 16.947708 | 10.022451 | C | 20.270456 | 19.438923 | 9.982495  |
| C          | 11.041769 | 15.710278 | 10.021648 | C | 22.388908 | 18.223364 | 10.009927 |
| C          | 8.915323  | 14.470822 | 9.997073  | C | 21.696962 | 19.409578 | 9.982328  |
| C          | 9.621267  | 15.701271 | 9.984677  | C | 19.538925 | 20.645018 | 9.949735  |
| C          | 7.505777  | 11.998029 | 9.983179  | C | 10.480819 | 13.162192 | 6.513826  |
| C          | 7.492275  | 14.460227 | 9.951904  | C | 11.663274 | 12.737086 | 5.690558  |
| C          | 13.875481 | 18.178762 | 9.988806  | C | 13.028923 | 12.681106 | 6.383057  |
| C          | 15.294036 | 18.185089 | 10.003403 | C | 13.614880 | 14.061674 | 6.646616  |
| C          | 18.151499 | 15.723604 | 10.086493 | C | 15.810524 | 12.987890 | 6.748677  |
| C          | 17.463188 | 12.024093 | 10.172775 | O | 11.577868 | 12.412935 | 4.512698  |
| C          | 18.167807 | 13.256133 | 10.147703 | O | 12.953772 | 15.080693 | 6.730169  |
| C          | 6.790186  | 13.230196 | 9.948958  | O | 14.964553 | 14.152606 | 6.815400  |
| C          | 11.748669 | 16.940300 | 9.995977  | H | 15.883067 | 7.380431  | 10.163448 |
| C          | 17.432777 | 16.955759 | 10.051789 | H | 20.161734 | 9.876793  | 10.180828 |
| C          | 11.074036 | 8.305920  | 10.077712 | H | 18.023100 | 8.626493  | 10.185946 |
| C          | 8.939375  | 9.534589  | 10.029130 | H | 22.299969 | 11.124676 | 10.155313 |
| C          | 19.591843 | 13.267442 | 10.135571 | H | 9.062837  | 19.095636 | 9.867925  |
| C          | 19.575735 | 15.729738 | 10.079802 | H | 11.198202 | 20.339783 | 9.872009  |
| C          | 20.292706 | 14.498029 | 10.104891 | H | 13.336451 | 21.583542 | 9.872489  |
| C          | 18.140244 | 18.191242 | 10.015544 | H | 6.926502  | 17.849707 | 9.858564  |
| C          | 16.005228 | 19.417864 | 9.969541  | H | 13.741577 | 6.137167  | 10.123672 |
| C          | 7.516995  | 9.531576  | 9.990553  | H | 23.516966 | 13.268929 | 10.109677 |
| C          | 19.562927 | 18.195621 | 10.015613 | H | 9.136898  | 4.893003  | 10.020700 |
| C          | 20.280560 | 16.965223 | 10.046035 | H | 3.567923  | 14.460979 | 9.839703  |
| C          | 15.275476 | 20.660145 | 9.925473  | H | 3.588685  | 11.985219 | 9.866421  |
| C          | 9.657732  | 8.303625  | 10.044169 | H | 6.993684  | 6.134289  | 9.975490  |
| C          | 16.061033 | 9.535574  | 10.174729 | H | 4.842168  | 7.369226  | 9.921115  |
| C          | 13.931294 | 8.297829  | 10.138221 | H | 17.941042 | 22.832203 | 9.885271  |
| C          | 11.803845 | 7.063236  | 10.088276 | H | 15.474358 | 22.829103 | 9.867015  |
| C          | 18.188673 | 10.777388 | 10.178585 | H | 23.494583 | 15.744604 | 10.060577 |
| C          | 15.333894 | 8.326016  | 10.160913 | H | 4.787662  | 16.604967 | 9.837431  |
| C          | 19.609108 | 10.820636 | 10.172524 | H | 11.602510 | 4.893529  | 10.075809 |
| C          | 20.312733 | 12.019646 | 10.152174 | H | 3.599512  | 9.504230  | 9.881922  |
| C          | 17.472055 | 9.570928  | 10.182761 | H | 22.236942 | 20.359499 | 9.958484  |
| C          | 13.193587 | 7.083633  | 10.117394 | H | 23.481750 | 18.225500 | 10.007769 |
| C          | 21.751144 | 12.069645 | 10.142410 | H | 20.084446 | 21.592823 | 9.924573  |
| C          | 22.424078 | 13.255655 | 10.116556 | H | 9.586880  | 13.238980 | 5.885083  |
| C          | 13.150177 | 19.423607 | 9.936543  | H | 10.308106 | 12.423959 | 7.314197  |
| C          | 8.896414  | 16.946177 | 9.929798  | H | 10.697762 | 14.122288 | 7.005993  |
| C          | 6.772099  | 15.707601 | 9.905711  | H | 13.693464 | 12.077597 | 5.751389  |
| C          | 9.612966  | 18.151543 | 9.910173  | H | 12.938713 | 12.177319 | 7.362627  |
| C          | 11.748111 | 19.395443 | 9.913647  | H | 15.450166 | 12.182858 | 7.404605  |
| C          | 13.885816 | 20.638538 | 9.909213  | H | 15.898234 | 12.625856 | 5.712982  |
| C          | 17.421703 | 19.421740 | 9.977901  | H | 16.792076 | 13.322809 | 7.104131  |
| G-MAA-enol |           |           |           |   |           |           |           |
| C          | 9.630058  | 10.780956 | 10.074320 | C | 7.469457  | 16.921556 | 10.012800 |
| C          | 11.049480 | 10.782616 | 10.088748 | C | 6.782306  | 10.778896 | 10.019162 |
| C          | 11.758600 | 12.014878 | 10.118937 | C | 21.718750 | 14.498333 | 10.047595 |

|   |           |           |           |   |           |           |           |
|---|-----------|-----------|-----------|---|-----------|-----------|-----------|
| C | 11.043134 | 13.249958 | 10.132528 | C | 11.018016 | 18.196663 | 10.065527 |
| C | 9.621315  | 13.246960 | 10.107849 | C | 18.147306 | 20.658691 | 10.037600 |
| C | 8.914406  | 12.015571 | 10.080793 | C | 16.032543 | 21.886929 | 10.024381 |
| C | 13.178521 | 12.016285 | 10.120025 | C | 6.785797  | 8.305069  | 9.998569  |
| C | 11.749678 | 14.481611 | 10.144209 | C | 7.514542  | 7.096977  | 9.994553  |
| C | 13.170100 | 14.483490 | 10.151268 | C | 5.359487  | 8.338122  | 9.975449  |
| C | 13.886160 | 13.247876 | 10.139902 | C | 4.670826  | 9.526428  | 9.968847  |
| C | 15.306834 | 13.249685 | 10.129030 | C | 17.396296 | 21.884991 | 10.022387 |
| C | 16.014090 | 14.481311 | 10.132723 | C | 21.705929 | 16.952583 | 10.043731 |
| C | 15.298002 | 15.716740 | 10.137586 | C | 22.392296 | 15.719842 | 10.039759 |
| C | 13.877925 | 15.715506 | 10.142858 | C | 5.339694  | 13.233855 | 9.985265  |
| C | 11.765651 | 9.546043  | 10.066266 | C | 5.325188  | 15.678733 | 9.969470  |
| C | 13.895514 | 10.778831 | 10.091005 | C | 11.023699 | 5.845854  | 9.999732  |
| C | 16.024483 | 12.012470 | 10.100728 | C | 8.909368  | 7.074369  | 10.007778 |
| C | 15.315338 | 10.782598 | 10.083443 | C | 9.660031  | 5.847852  | 9.994842  |
| C | 13.184379 | 9.548618  | 10.066985 | C | 4.648954  | 14.494554 | 9.959778  |
| C | 17.436462 | 14.484523 | 10.107462 | C | 5.351685  | 10.779831 | 9.986911  |
| C | 16.007654 | 16.949188 | 10.111122 | C | 4.665997  | 12.012682 | 9.970917  |
| C | 13.161054 | 16.952946 | 10.117105 | C | 20.270945 | 19.427731 | 10.038831 |
| C | 11.032686 | 15.718680 | 10.118641 | C | 22.386215 | 18.206507 | 10.030310 |
| C | 8.904196  | 14.483203 | 10.084316 | C | 21.697239 | 19.394770 | 10.027824 |
| C | 9.611720  | 15.713028 | 10.087026 | C | 19.542120 | 20.635973 | 10.030334 |
| C | 7.490239  | 12.012900 | 10.043922 | C | 9.504702  | 13.413563 | 6.551310  |
| C | 7.480982  | 14.475343 | 10.041215 | C | 10.996111 | 13.403374 | 6.555525  |
| C | 13.871924 | 18.183268 | 10.091928 | C | 11.771534 | 14.533348 | 6.642594  |
| C | 15.290982 | 18.186136 | 10.091291 | C | 13.204778 | 14.413948 | 6.611934  |
| C | 18.143314 | 15.715883 | 10.093266 | C | 15.300454 | 15.524350 | 6.625623  |
| C | 17.445831 | 12.018042 | 10.084812 | O | 11.532290 | 12.182166 | 6.454355  |
| C | 18.153669 | 13.247972 | 10.088928 | O | 13.820708 | 13.325960 | 6.518835  |
| C | 6.776610  | 13.246714 | 10.025291 | O | 13.860054 | 15.598683 | 6.693575  |
| C | 11.741431 | 16.948797 | 10.103689 | H | 15.857498 | 7.379910  | 10.015226 |
| C | 17.427593 | 16.950573 | 10.093229 | H | 20.139147 | 9.864305  | 10.029718 |
| C | 11.051560 | 8.314925  | 10.040589 | H | 17.998541 | 8.620394  | 10.025336 |
| C | 8.919552  | 9.547054  | 10.044305 | H | 22.280102 | 11.106613 | 10.025938 |
| C | 19.577389 | 13.256061 | 10.069239 | H | 9.058617  | 19.110174 | 10.010809 |
| C | 19.567501 | 15.718891 | 10.072971 | H | 11.198388 | 20.351168 | 10.023037 |
| C | 20.281460 | 14.485155 | 10.064965 | H | 13.340749 | 21.590326 | 10.021875 |
| C | 18.137814 | 18.185013 | 10.070249 | H | 6.920139  | 17.866983 | 9.985957  |
| C | 16.005342 | 19.417652 | 10.065397 | H | 13.714772 | 6.141351  | 10.002501 |
| C | 7.496769  | 9.546456  | 10.022916 | H | 23.502893 | 13.248043 | 10.024379 |
| C | 19.560570 | 18.185764 | 10.056847 | H | 9.107600  | 4.905012  | 9.978902  |
| C | 20.275097 | 16.953129 | 10.059064 | H | 3.556515  | 14.484022 | 9.930099  |
| C | 15.277798 | 20.661873 | 10.044443 | H | 3.572494  | 12.007966 | 9.943450  |
| C | 9.635145  | 8.314632  | 10.032403 | H | 6.966709  | 6.150278  | 9.976515  |
| C | 16.038813 | 9.534665  | 10.055301 | H | 4.816908  | 7.389609  | 9.960413  |
| C | 13.907538 | 8.301655  | 10.041089 | H | 17.948868 | 22.827801 | 10.006685 |
| C | 11.778528 | 7.070778  | 10.020491 | H | 15.482272 | 22.830908 | 10.009788 |
| C | 18.168755 | 10.770452 | 10.059432 | H | 23.486107 | 15.724751 | 10.026853 |
| C | 15.310167 | 8.326377  | 10.036538 | H | 4.779925  | 16.625654 | 9.947273  |
| C | 19.589079 | 10.809484 | 10.046404 | H | 11.573711 | 4.901568  | 9.987334  |
| C | 20.295681 | 12.006621 | 10.051645 | H | 3.578176  | 9.527457  | 9.948228  |
| C | 17.449747 | 9.565937  | 10.046325 | H | 22.239632 | 20.343494 | 10.015720 |
| C | 13.168361 | 7.088624  | 10.020421 | H | 23.479063 | 18.206104 | 10.020010 |
| C | 21.733992 | 12.053122 | 10.037346 | H | 20.089830 | 21.582769 | 10.015180 |
| C | 22.410019 | 13.237531 | 10.036429 | H | 9.122254  | 12.699937 | 7.295585  |

|            |           |           |           |   |           |           |           |
|------------|-----------|-----------|-----------|---|-----------|-----------|-----------|
| C          | 13.148606 | 19.430387 | 10.061651 | H | 11.314780 | 15.514809 | 6.740452  |
| C          | 8.889195  | 16.960287 | 10.047818 | H | 9.109609  | 14.412307 | 6.771296  |
| C          | 6.763030  | 15.724601 | 10.008657 | H | 9.133589  | 13.086303 | 5.567375  |
| C          | 9.607623  | 18.164961 | 10.040854 | H | 12.542302 | 12.332469 | 6.458925  |
| C          | 11.746209 | 19.405159 | 10.049538 | H | 15.689263 | 14.791962 | 7.345180  |
| C          | 13.887836 | 20.643511 | 10.041668 | H | 15.618605 | 15.237730 | 5.612793  |
| C          | 17.421907 | 19.417822 | 10.059082 | H | 15.654007 | 16.531755 | 6.871511  |
| G-DMM-keto |           |           |           |   |           |           |           |
| C          | 9.552114  | 10.723683 | 10.275765 | C | 6.704877  | 10.734652 | 10.209402 |
| C          | 10.972156 | 10.718783 | 10.298946 | C | 21.661613 | 14.371147 | 10.141064 |
| C          | 11.687760 | 11.947803 | 10.281156 | C | 10.980447 | 18.125164 | 9.957213  |
| C          | 10.978439 | 13.185301 | 10.237625 | C | 18.124651 | 20.541166 | 9.798228  |
| C          | 9.556866  | 13.188964 | 10.206988 | C | 16.016804 | 21.778364 | 9.719091  |
| C          | 8.842992  | 11.961428 | 10.229602 | C | 5.274722  | 13.194863 | 10.100071 |
| C          | 13.108023 | 11.941667 | 10.288333 | C | 5.272740  | 15.638269 | 10.004286 |
| C          | 11.692024 | 14.412081 | 10.195231 | C | 10.921531 | 5.781958  | 10.383912 |
| C          | 13.112796 | 14.406625 | 10.205448 | C | 8.813335  | 7.020328  | 10.330307 |
| C          | 13.822468 | 13.168368 | 10.255075 | C | 9.557974  | 5.790441  | 10.363883 |
| C          | 15.242523 | 13.162612 | 10.254558 | C | 4.590336  | 14.457989 | 10.038445 |
| C          | 15.956470 | 14.388949 | 10.205248 | C | 5.274280  | 10.741940 | 10.175830 |
| C          | 15.248202 | 15.627069 | 10.145723 | C | 4.594646  | 11.977194 | 10.124413 |
| C          | 13.827759 | 15.633379 | 10.143286 | C | 6.696050  | 8.261065  | 10.266520 |
| C          | 11.682318 | 9.478498  | 10.329227 | C | 7.418745  | 7.049765  | 10.305273 |
| C          | 13.818464 | 10.700894 | 10.319818 | C | 5.270072  | 8.300632  | 10.235216 |
| C          | 15.953425 | 11.922574 | 10.289442 | C | 4.587544  | 9.491786  | 10.192270 |
| C          | 15.238092 | 10.697285 | 10.322798 | C | 17.380512 | 21.768934 | 9.716070  |
| C          | 13.101162 | 9.474406  | 10.341894 | C | 21.662762 | 16.821880 | 10.008854 |
| C          | 17.378923 | 14.383936 | 10.191438 | C | 22.342056 | 15.586788 | 10.070758 |
| C          | 15.964167 | 16.853460 | 10.067153 | C | 20.241577 | 19.300545 | 9.868300  |
| C          | 13.117827 | 16.872749 | 10.060482 | C | 22.350269 | 18.069263 | 9.927470  |
| C          | 10.981317 | 15.650919 | 10.115091 | C | 21.667797 | 19.259325 | 9.859377  |
| C          | 8.846051  | 14.427297 | 10.134853 | C | 19.519302 | 20.510212 | 9.793474  |
| C          | 9.559865  | 15.652233 | 10.087333 | C | 11.865488 | 13.984913 | 6.014520  |
| C          | 7.418854  | 11.964946 | 10.192451 | C | 12.644588 | 15.185498 | 6.509054  |
| C          | 7.422570  | 14.425985 | 10.101506 | C | 14.120049 | 14.853475 | 6.655461  |
| C          | 13.835859 | 18.096558 | 9.978694  | C | 16.294333 | 15.794098 | 6.671998  |
| C          | 15.254498 | 18.091238 | 9.981074  | C | 10.517423 | 12.155434 | 6.666069  |
| C          | 18.092838 | 15.609625 | 10.121329 | O | 11.805920 | 13.632691 | 4.849098  |
| C          | 17.374582 | 11.919939 | 10.282671 | O | 14.579162 | 13.743530 | 6.861259  |
| C          | 18.089310 | 13.144213 | 10.233883 | O | 14.865011 | 15.982970 | 6.547003  |
| C          | 6.711761  | 13.201180 | 10.133517 | O | 11.241581 | 13.351153 | 7.036400  |
| C          | 11.697345 | 16.875891 | 10.047448 | H | 15.763033 | 7.292237  | 10.401547 |
| C          | 17.384010 | 16.846598 | 10.056836 | H | 20.055603 | 9.751178  | 10.342901 |
| C          | 10.961700 | 8.250867  | 10.341768 | H | 17.909567 | 8.520784  | 10.378983 |
| C          | 8.835508  | 9.492952  | 10.285197 | H | 22.203747 | 10.979454 | 10.290351 |
| C          | 19.513023 | 13.143650 | 10.219664 | H | 9.025960  | 19.046877 | 9.878776  |
| C          | 19.517227 | 15.603540 | 10.102130 | H | 11.174196 | 20.274109 | 9.814429  |
| C          | 20.224194 | 14.366952 | 10.156839 | H | 13.323889 | 21.498507 | 9.740632  |
| C          | 18.101147 | 18.073788 | 9.967225  | H | 6.879481  | 17.816181 | 9.924709  |
| C          | 15.975616 | 19.315514 | 9.892097  | H | 13.614415 | 6.064824  | 10.411669 |
| C          | 7.412956  | 9.499151  | 10.255260 | H | 23.438833 | 13.111929 | 10.185865 |
| C          | 19.523930 | 18.065781 | 9.954383  | H | 9.000881  | 4.850093  | 10.371473 |
| C          | 20.231846 | 16.831314 | 10.023705 | H | 3.497612  | 14.452226 | 10.016143 |

|            |           |           |           |   |           |           |           |
|------------|-----------|-----------|-----------|---|-----------|-----------|-----------|
| C          | 15.255078 | 20.560631 | 9.805777  | H | 3.500953  | 11.977255 | 10.099322 |
| C          | 9.545252  | 8.257209  | 10.320502 | H | 6.866269  | 6.105832  | 10.313777 |
| C          | 15.954988 | 9.445833  | 10.354081 | H | 4.722765  | 7.354704  | 10.244363 |
| C          | 13.817926 | 8.223764  | 10.371696 | H | 17.938122 | 22.706553 | 9.648998  |
| C          | 11.682676 | 7.003231  | 10.372860 | H | 15.472077 | 22.723469 | 9.654190  |
| C          | 18.090950 | 10.669394 | 10.318583 | H | 23.435926 | 15.585014 | 10.059149 |
| C          | 15.220536 | 8.241356  | 10.379418 | H | 4.732188  | 16.586817 | 9.954676  |
| C          | 19.511351 | 10.699445 | 10.312344 | H | 11.466626 | 4.835089  | 10.407802 |
| C          | 20.224764 | 11.891329 | 10.264374 | H | 3.494952  | 9.497339  | 10.167679 |
| C          | 17.365932 | 9.469217  | 10.354435 | H | 22.215305 | 20.202822 | 9.795092  |
| C          | 13.072584 | 7.014556  | 10.388492 | H | 23.443039 | 18.061935 | 9.917857  |
| C          | 21.663319 | 11.928630 | 10.252987 | H | 20.072342 | 21.451715 | 9.728024  |
| C          | 22.346069 | 13.107681 | 10.195085 | H | 12.274143 | 15.516165 | 7.491295  |
| C          | 13.118998 | 19.344391 | 9.888984  | H | 12.524683 | 16.010872 | 5.796284  |
| C          | 8.844187  | 16.901114 | 10.004512 | H | 16.530029 | 15.188690 | 7.556077  |
| C          | 6.711113  | 15.677265 | 10.029809 | H | 16.683746 | 15.291148 | 5.775758  |
| C          | 9.569589  | 18.100220 | 9.943390  | H | 16.714302 | 16.800896 | 6.766413  |
| C          | 11.716184 | 19.326832 | 9.882774  | H | 9.774044  | 12.382986 | 5.889953  |
| C          | 13.865152 | 20.550514 | 9.806990  | H | 11.215140 | 11.395696 | 6.287951  |
| C          | 17.392040 | 19.307743 | 9.886872  | H | 10.030868 | 11.812350 | 7.585234  |
| C          | 7.423942  | 16.869423 | 9.983243  |   |           |           |           |
| G-DMM-enol |           |           |           |   |           |           |           |
| C          | 9.589270  | 10.662603 | 10.218876 | C | 6.742515  | 10.615860 | 10.163609 |
| C          | 11.008999 | 10.685852 | 10.232466 | C | 21.621656 | 14.554660 | 10.009115 |
| C          | 11.700111 | 11.928694 | 10.217485 | C | 10.866658 | 18.091951 | 9.935694  |
| C          | 10.965764 | 13.152461 | 10.184062 | C | 17.958195 | 20.656626 | 9.776395  |
| C          | 9.543648  | 13.127511 | 10.162230 | C | 15.824899 | 21.851313 | 9.721422  |
| C          | 8.855203  | 11.885998 | 10.182976 | C | 5.262479  | 13.046664 | 10.056529 |
| C          | 13.119830 | 11.951200 | 10.217027 | C | 5.211646  | 15.489308 | 9.960419  |
| C          | 11.653912 | 14.393993 | 10.147182 | C | 11.058064 | 5.747969  | 10.290807 |
| C          | 13.074313 | 14.417484 | 10.154216 | C | 8.925172  | 6.944186  | 10.260330 |
| C          | 13.809013 | 13.193171 | 10.188863 | C | 9.694366  | 5.729280  | 10.282186 |
| C          | 15.229424 | 13.215973 | 10.174216 | C | 4.552852  | 14.295755 | 9.994304  |
| C          | 15.917777 | 14.457155 | 10.128856 | C | 5.312160  | 10.594211 | 10.133084 |
| C          | 15.183438 | 15.681068 | 10.091584 | C | 4.607535  | 11.815458 | 10.082184 |
| C          | 13.763370 | 15.658730 | 10.100453 | C | 6.783289  | 8.142184  | 10.214820 |
| C          | 11.743873 | 9.459838  | 10.250365 | C | 7.530145  | 6.945457  | 10.244494 |
| C          | 13.855177 | 10.724896 | 10.231849 | C | 5.356674  | 8.153065  | 10.191045 |
| C          | 15.965260 | 11.989704 | 10.190628 | C | 4.650512  | 9.330489  | 10.151706 |
| C          | 15.274789 | 10.749588 | 10.220892 | C | 17.188641 | 21.869936 | 9.712228  |
| C          | 13.162457 | 9.484122  | 10.250772 | C | 21.572392 | 17.006586 | 9.910386  |
| C          | 17.339945 | 14.480700 | 10.100251 | C | 22.276836 | 15.784660 | 9.948385  |
| C          | 15.874776 | 16.922434 | 10.020293 | C | 20.100582 | 19.458612 | 9.816699  |
| C          | 13.028210 | 16.883238 | 10.029778 | C | 22.233858 | 18.268904 | 9.841799  |
| C          | 10.918224 | 15.618306 | 10.077670 | C | 21.527370 | 19.446117 | 9.797117  |
| C          | 8.808626  | 14.351184 | 10.094482 | C | 19.353374 | 20.654415 | 9.762229  |
| C          | 9.497785  | 15.590523 | 10.051171 | C | 11.901736 | 13.782213 | 6.728603  |
| C          | 7.431466  | 11.860453 | 10.147887 | C | 12.552637 | 15.043136 | 6.710341  |
| C          | 7.385591  | 14.320878 | 10.059545 | C | 13.939063 | 15.026101 | 6.685652  |
| C          | 13.720922 | 18.121750 | 9.955252  | C | 9.876937  | 12.548713 | 6.734600  |
| C          | 15.139532 | 18.146135 | 9.951362  | C | 16.057821 | 16.101889 | 6.603941  |
| C          | 18.028734 | 15.721096 | 10.038469 | O | 12.516381 | 12.670559 | 6.718535  |
| C          | 17.386135 | 12.015839 | 10.169169 | O | 14.634497 | 13.908989 | 6.673715  |

|   |           |           |           |   |           |           |           |
|---|-----------|-----------|-----------|---|-----------|-----------|-----------|
| C | 18.075418 | 13.255168 | 10.123894 | O | 10.550405 | 13.824415 | 6.764294  |
| C | 6.699325  | 13.082119 | 10.089833 | O | 14.616851 | 16.180954 | 6.680543  |
| C | 11.608730 | 16.857338 | 10.017989 | H | 15.867530 | 7.354901  | 10.267839 |
| C | 17.294491 | 16.944321 | 9.996651  | H | 20.110657 | 9.901542  | 10.181561 |
| C | 11.048355 | 8.217680  | 10.261997 | H | 17.989981 | 8.626808  | 10.232788 |
| C | 8.897917  | 9.417381  | 10.226479 | H | 22.231716 | 11.172571 | 10.114025 |
| C | 19.498695 | 13.283537 | 10.095448 | H | 8.893733  | 18.974533 | 9.858074  |
| C | 19.452728 | 15.744062 | 10.006227 | H | 11.015756 | 20.245771 | 9.808243  |
| C | 20.184885 | 14.521408 | 10.039027 | H | 13.137967 | 21.514252 | 9.746283  |
| C | 17.986076 | 18.186930 | 9.915874  | H | 6.773644  | 17.699612 | 9.890268  |
| C | 15.834986 | 19.385771 | 9.869379  | H | 13.744838 | 6.085161  | 10.292224 |
| C | 7.475312  | 9.394754  | 10.203916 | H | 23.423508 | 13.329635 | 10.019108 |
| C | 19.408707 | 18.208181 | 9.891401  | H | 9.155742  | 4.778192  | 10.289970 |
| C | 20.141655 | 16.987103 | 9.937815  | H | 3.460709  | 14.268361 | 9.971759  |
| C | 15.088871 | 20.616940 | 9.798353  | H | 3.514131  | 11.793225 | 10.058213 |
| C | 9.632039  | 8.195755  | 10.251540 | H | 6.996245  | 5.990728  | 10.251467 |
| C | 16.016836 | 9.512319  | 10.234937 | H | 4.828396  | 7.196509  | 10.202800 |
| C | 13.904255 | 8.247903  | 10.264885 | H | 17.727137 | 22.819153 | 9.652943  |
| C | 11.794250 | 6.984483  | 10.279242 | H | 15.259638 | 22.785278 | 9.668752  |
| C | 18.127329 | 10.779121 | 10.187213 | H | 23.370268 | 15.805300 | 9.926240  |
| C | 15.306319 | 8.293398  | 10.258541 | H | 4.652322  | 16.426802 | 9.909374  |
| C | 19.546623 | 10.838533 | 10.165667 | H | 11.622211 | 4.812108  | 10.305503 |
| C | 20.235216 | 12.045110 | 10.120317 | H | 3.557997  | 9.314854  | 10.131361 |
| C | 17.426962 | 9.564171  | 10.221092 | H | 22.055862 | 20.401327 | 9.743463  |
| C | 13.183579 | 7.023735  | 10.281098 | H | 23.326336 | 18.283684 | 9.823552  |
| C | 21.672455 | 12.111267 | 10.092980 | H | 19.887104 | 21.607685 | 9.704153  |
| C | 22.331125 | 13.304239 | 10.040555 | H | 11.999043 | 15.975848 | 6.732567  |
| C | 12.978991 | 19.355452 | 9.876221  | H | 13.864287 | 13.154517 | 6.692389  |
| C | 8.756538  | 16.824772 | 9.972463  | H | 10.001930 | 12.073708 | 5.750647  |
| C | 6.648865  | 15.557495 | 9.988618  | H | 10.269326 | 11.878431 | 7.510478  |
| C | 9.456642  | 18.039026 | 9.919004  | H | 8.821778  | 12.776349 | 6.921452  |
| C | 11.577100 | 19.309372 | 9.870229  | H | 16.460154 | 15.473495 | 7.409155  |
| C | 13.699556 | 20.577610 | 9.803248  | H | 16.367266 | 15.694710 | 5.630750  |
| C | 17.251413 | 19.407139 | 9.855377  | H | 16.404171 | 17.134695 | 6.717914  |
| C | 7.337363  | 16.764126 | 9.947354  |   |           |           |           |

GO-AA-keto (above)

|   |           |           |           |   |           |           |           |
|---|-----------|-----------|-----------|---|-----------|-----------|-----------|
| C | 19.055614 | 11.078332 | 10.326358 | C | 8.424192  | 14.971971 | 9.988726  |
| C | 18.392363 | 12.278502 | 10.456516 | C | 7.725267  | 13.770138 | 9.945037  |
| C | 19.129837 | 13.549826 | 10.419836 | C | 8.367701  | 12.534824 | 10.152199 |
| C | 20.521976 | 13.557441 | 10.229545 | C | 10.351655 | 6.382780  | 9.516690  |
| C | 21.286427 | 12.303997 | 10.247565 | C | 9.621052  | 7.598874  | 9.740587  |
| C | 20.519871 | 11.012321 | 10.274882 | C | 8.281748  | 10.083447 | 10.068138 |
| C | 18.435190 | 14.797949 | 10.486079 | C | 8.239257  | 7.644306  | 9.630193  |
| C | 21.244019 | 14.760961 | 10.030809 | C | 7.478471  | 8.856053  | 9.813481  |
| C | 20.565037 | 15.985435 | 10.158504 | C | 7.649111  | 11.314011 | 10.052631 |
| C | 19.173069 | 16.027514 | 10.378660 | C | 14.641150 | 6.276963  | 9.583469  |
| C | 21.355478 | 17.226782 | 10.158244 | C | 12.492456 | 5.160398  | 9.252175  |
| C | 22.711634 | 17.188103 | 9.590813  | C | 13.860357 | 5.142497  | 9.221286  |
| C | 23.355980 | 15.973018 | 9.475290  | C | 7.573481  | 16.176886 | 9.753048  |
| C | 22.667219 | 14.739016 | 9.761400  | C | 9.606872  | 5.129634  | 9.174249  |
| C | 23.352728 | 13.521304 | 9.655799  | C | 17.071424 | 17.258450 | 12.460109 |
| C | 22.659670 | 12.299980 | 9.714455  | C | 13.914592 | 12.029669 | 14.200357 |
| C | 16.950737 | 12.287199 | 10.590349 | C | 15.176173 | 12.246897 | 14.984114 |

|   |           |           |           |   |           |           |           |
|---|-----------|-----------|-----------|---|-----------|-----------|-----------|
| C | 16.267494 | 13.566402 | 10.962457 | C | 15.166655 | 13.466784 | 15.952395 |
| C | 17.011744 | 14.829584 | 10.596366 | C | 15.951597 | 14.619089 | 15.365187 |
| C | 16.300255 | 16.023403 | 10.571037 | C | 17.442076 | 14.534997 | 15.413550 |
| C | 17.038193 | 17.314833 | 10.846272 | O | 26.624624 | 12.997021 | 11.185988 |
| C | 18.490419 | 17.291800 | 10.434765 | O | 24.737968 | 14.040661 | 11.898970 |
| C | 20.616150 | 18.534925 | 10.180355 | O | 16.343431 | 13.576002 | 12.461591 |
| C | 19.143957 | 18.488981 | 10.224652 | O | 21.247501 | 18.016802 | 11.392042 |
| C | 24.734402 | 15.930652 | 9.000644  | O | 21.192041 | 22.053982 | 9.171045  |
| C | 25.424694 | 14.767334 | 8.981134  | O | 18.416216 | 5.791815  | 7.726944  |
| C | 21.294746 | 19.726143 | 9.612096  | O | 19.864576 | 5.778259  | 9.467331  |
| C | 23.359505 | 18.425747 | 9.200219  | O | 14.356122 | 7.799734  | 11.506543 |
| C | 22.608625 | 19.652622 | 9.227697  | O | 21.180784 | 11.513844 | 11.479460 |
| C | 18.434177 | 19.731174 | 10.090083 | O | 14.165929 | 19.620682 | 10.008082 |
| C | 17.035582 | 19.718477 | 10.144349 | O | 26.580957 | 17.181759 | 8.108789  |
| C | 16.300571 | 18.554337 | 10.390123 | O | 10.254996 | 11.186420 | 12.266993 |
| C | 14.875216 | 16.040504 | 10.557377 | O | 6.488332  | 16.144312 | 9.188912  |
| C | 14.143559 | 14.846559 | 10.652821 | O | 8.072255  | 17.348532 | 10.255230 |
| C | 14.793967 | 13.599315 | 10.659381 | O | 9.668390  | 4.548601  | 8.102240  |
| C | 16.202261 | 11.121989 | 10.486893 | O | 8.849631  | 4.680899  | 10.214109 |
| C | 16.860737 | 9.861625  | 10.285013 | O | 18.084867 | 17.014427 | 13.086897 |
| C | 18.349209 | 9.766615  | 10.492346 | O | 15.846332 | 17.383778 | 12.986225 |
| C | 21.137905 | 9.841411  | 9.627724  | O | 6.229427  | 8.876698  | 9.759625  |
| C | 22.470125 | 9.903470  | 9.224593  | O | 25.017950 | 9.956415  | 8.189651  |
| C | 23.233246 | 11.088909 | 9.282835  | O | 18.546804 | 9.353630  | 11.900849 |
| C | 18.986729 | 8.623940  | 9.718515  | O | 12.581818 | 14.964294 | 12.459921 |
| C | 20.329472 | 8.720544  | 9.365294  | O | 16.163071 | 11.532099 | 14.909891 |
| C | 24.595812 | 11.133506 | 8.752926  | O | 15.339745 | 15.565518 | 14.841165 |
| C | 25.347929 | 12.252846 | 8.810128  | H | 26.467386 | 14.772797 | 8.651276  |
| C | 25.422522 | 17.197449 | 8.568462  | H | 23.106903 | 20.557287 | 8.874916  |
| C | 24.662090 | 18.414482 | 8.727736  | H | 16.531076 | 20.659031 | 9.896176  |
| C | 20.512077 | 20.927137 | 9.534811  | H | 22.925997 | 9.017765  | 8.779496  |
| C | 19.157156 | 20.923098 | 9.788253  | H | 18.595106 | 21.858055 | 9.696264  |
| C | 14.904643 | 18.505081 | 10.269466 | H | 25.153013 | 19.343626 | 8.430780  |
| C | 14.159587 | 17.303398 | 10.392346 | H | 26.379219 | 12.260476 | 8.451818  |
| C | 14.063388 | 12.410480 | 10.594563 | H | 20.806108 | 7.878954  | 8.859597  |
| C | 14.743527 | 11.153796 | 10.508891 | H | 25.241987 | 14.030915 | 12.741680 |
| C | 24.855236 | 13.486155 | 9.517227  | H | 15.747581 | 14.301424 | 12.746712 |
| C | 25.522993 | 13.455264 | 10.965833 | H | 20.573490 | 22.805775 | 9.117334  |
| C | 18.196487 | 7.484773  | 9.438286  | H | 16.498468 | 5.414701  | 9.059792  |
| C | 16.161018 | 8.692553  | 10.105157 | H | 12.266576 | 18.233728 | 10.010662 |
| C | 14.005774 | 9.979933  | 10.407142 | H | 20.181915 | 5.008482  | 8.946002  |
| C | 12.614223 | 12.436791 | 10.579777 | H | 6.653703  | 13.795575 | 9.741300  |
| C | 12.670074 | 14.902934 | 10.965115 | H | 14.742582 | 20.406197 | 10.011954 |
| C | 12.775891 | 17.301231 | 10.257926 | H | 6.569145  | 11.328189 | 9.881250  |
| C | 16.807304 | 7.467422  | 9.694064  | H | 14.383581 | 4.241190  | 8.892017  |
| C | 14.711969 | 8.690963  | 10.389777 | H | 11.943184 | 4.266517  | 8.957357  |
| C | 12.568258 | 9.987988  | 10.384053 | H | 10.569441 | 10.306373 | 12.558010 |
| C | 11.897556 | 11.200182 | 10.513035 | H | 7.392078  | 18.024565 | 10.045752 |
| C | 11.923400 | 13.648742 | 10.636090 | H | 8.389889  | 3.873093  | 9.895402  |
| C | 12.003529 | 16.132153 | 10.412678 | H | 15.817693 | 16.888811 | 13.866958 |
| C | 10.644199 | 16.134199 | 10.152061 | H | 10.185488 | 17.077961 | 9.863461  |
| C | 13.923562 | 7.440871  | 10.149179 | H | 7.659784  | 6.746691  | 9.414021  |
| C | 16.009981 | 6.311374  | 9.442247  | H | 25.945105 | 10.053451 | 7.904076  |
| C | 18.807434 | 6.291744  | 8.771562  | H | 18.066584 | 9.992423  | 12.468565 |
| C | 10.498791 | 13.702810 | 10.444446 | H | 13.033262 | 15.787602 | 12.741312 |

|                    |           |           |           |   |           |           |           |
|--------------------|-----------|-----------|-----------|---|-----------|-----------|-----------|
| C                  | 10.418051 | 11.215543 | 10.783587 | H | 14.052849 | 11.225489 | 13.469085 |
| C                  | 11.816680 | 8.752849  | 10.159159 | H | 13.098474 | 11.765520 | 14.893817 |
| C                  | 12.463453 | 7.546826  | 9.940842  | H | 13.595456 | 12.958562 | 13.697956 |
| C                  | 11.743596 | 6.350105  | 9.567491  | H | 17.754597 | 13.534073 | 15.073151 |
| C                  | 10.377594 | 8.810641  | 10.055382 | H | 17.908369 | 15.321340 | 14.808733 |
| C                  | 9.695315  | 10.005196 | 10.246490 | H | 17.770435 | 14.619820 | 16.462986 |
| C                  | 9.759782  | 12.518167 | 10.414402 | H | 15.649229 | 13.124246 | 16.878929 |
| C                  | 9.836248  | 14.970481 | 10.221933 | H | 14.138750 | 13.798229 | 16.143446 |
| GO-AA-enol (above) |           |           |           |   |           |           |           |
| C                  | 19.056486 | 11.284094 | 10.246878 | C | 8.392108  | 15.079352 | 9.949896  |
| C                  | 18.392864 | 12.475897 | 10.438154 | C | 7.697187  | 13.875350 | 9.955534  |
| C                  | 19.127535 | 13.751370 | 10.422398 | C | 8.353382  | 12.649531 | 10.174629 |
| C                  | 20.523201 | 13.764164 | 10.243162 | C | 10.375944 | 6.509512  | 9.580205  |
| C                  | 21.289139 | 12.509928 | 10.231467 | C | 9.639992  | 7.721539  | 9.810727  |
| C                  | 20.520010 | 11.219271 | 10.186616 | C | 8.286441  | 10.198110 | 10.126138 |
| C                  | 18.422527 | 14.996362 | 10.470108 | C | 8.256466  | 7.755063  | 9.718771  |
| C                  | 21.244978 | 14.971139 | 10.051770 | C | 7.489651  | 8.965164  | 9.879284  |
| C                  | 20.553665 | 16.192425 | 10.139975 | C | 7.643301  | 11.422948 | 10.104853 |
| C                  | 19.153896 | 16.227720 | 10.324686 | C | 14.664081 | 6.480318  | 9.429565  |
| C                  | 21.330639 | 17.442911 | 10.119815 | C | 12.522496 | 5.324981  | 9.205385  |
| C                  | 22.710943 | 17.404629 | 9.613329  | C | 13.886095 | 5.336269  | 9.093514  |
| C                  | 23.367434 | 16.192741 | 9.540133  | C | 7.533334  | 16.279881 | 9.726258  |
| C                  | 22.675386 | 14.956711 | 9.812220  | C | 9.633946  | 5.238450  | 9.307517  |
| C                  | 23.366552 | 13.741725 | 9.707706  | C | 16.973108 | 17.731892 | 12.217259 |
| C                  | 22.671234 | 12.520887 | 9.719500  | C | 15.333685 | 9.640411  | 14.098574 |
| C                  | 16.949631 | 12.478727 | 10.591003 | C | 16.411919 | 10.665446 | 14.297005 |
| C                  | 16.266272 | 13.758341 | 10.991987 | C | 17.770136 | 10.253879 | 14.470848 |
| C                  | 16.997864 | 15.022897 | 10.580645 | C | 18.788363 | 11.188978 | 14.636970 |
| C                  | 16.271578 | 16.200500 | 10.494791 | C | 20.231106 | 10.838931 | 14.730297 |
| C                  | 16.986864 | 17.529280 | 10.632176 | O | 26.617216 | 13.175096 | 11.270814 |
| C                  | 18.457840 | 17.482744 | 10.278847 | O | 24.729383 | 14.217064 | 11.985415 |
| C                  | 20.572975 | 18.744646 | 10.045133 | O | 16.380106 | 13.888056 | 12.457747 |
| C                  | 19.103384 | 18.674507 | 10.010456 | O | 21.150545 | 18.287310 | 11.304564 |
| C                  | 24.762016 | 16.156521 | 9.112078  | O | 21.160625 | 22.228918 | 8.928144  |
| C                  | 25.454163 | 14.995329 | 9.097141  | O | 18.361755 | 6.176945  | 7.320538  |
| C                  | 21.266169 | 19.922052 | 9.466745  | O | 19.847427 | 6.047504  | 9.025337  |
| C                  | 23.365398 | 18.640192 | 9.222850  | O | 14.431473 | 7.932826  | 11.419027 |
| C                  | 22.602465 | 19.857145 | 9.170369  | O | 21.172686 | 11.657695 | 11.423507 |
| C                  | 18.382938 | 19.885836 | 9.730418  | O | 14.131282 | 19.662218 | 9.380580  |
| C                  | 16.985453 | 19.839127 | 9.668618  | O | 26.647457 | 17.411242 | 8.312887  |
| C                  | 16.256775 | 18.689087 | 9.982018  | O | 10.259237 | 11.351033 | 12.290096 |
| C                  | 14.844014 | 16.202383 | 10.453161 | O | 6.435837  | 16.243271 | 9.186886  |
| C                  | 14.121148 | 15.015002 | 10.625062 | O | 8.043462  | 17.449379 | 10.220827 |
| C                  | 14.783877 | 13.775051 | 10.695999 | O | 9.686563  | 4.596734  | 8.269581  |
| C                  | 16.208933 | 11.307465 | 10.469278 | O | 8.887578  | 4.843819  | 10.377940 |
| C                  | 16.869822 | 10.059161 | 10.203752 | O | 17.906040 | 17.471325 | 12.945232 |
| C                  | 18.365250 | 9.957945  | 10.341974 | O | 15.768966 | 18.178919 | 12.648409 |
| C                  | 21.136448 | 10.083446 | 9.478369  | O | 6.241186  | 8.982996  | 9.806226  |
| C                  | 22.478043 | 10.152420 | 9.111195  | O | 25.057327 | 10.215512 | 8.171977  |
| C                  | 23.248585 | 11.324883 | 9.250664  | O | 18.636616 | 9.421603  | 11.692204 |
| C                  | 18.979742 | 8.879278  | 9.465023  | O | 12.471942 | 15.373267 | 12.324047 |
| C                  | 20.322428 | 8.993284  | 9.121185  | O | 16.100483 | 11.902496 | 14.306308 |
| C                  | 24.624020 | 11.378362 | 8.756989  | O | 18.525492 | 12.482708 | 14.671960 |



|   |           |           |           |   |           |           |           |
|---|-----------|-----------|-----------|---|-----------|-----------|-----------|
| C | 25.377865 | 12.491647 | 8.865799  | H | 26.505888 | 15.006995 | 8.797068  |
| C | 25.465754 | 17.424356 | 8.709632  | H | 23.108734 | 20.755733 | 8.813812  |
| C | 24.689178 | 18.634958 | 8.813540  | H | 16.483227 | 20.743172 | 9.305662  |
| C | 20.472485 | 21.102461 | 9.278995  | H | 22.934986 | 9.289489  | 8.624512  |
| C | 19.101933 | 21.076626 | 9.415400  | H | 18.529127 | 21.989891 | 9.224557  |
| C | 14.868488 | 18.603846 | 9.820440  | H | 25.182899 | 19.564377 | 8.522521  |
| C | 14.128129 | 17.427505 | 10.108198 | H | 26.418106 | 12.506270 | 8.535077  |
| C | 14.060203 | 12.578094 | 10.623449 | H | 20.799164 | 8.185165  | 8.563711  |
| C | 14.747868 | 11.326015 | 10.513182 | H | 25.228989 | 14.194744 | 12.830526 |
| C | 24.871759 | 13.706260 | 9.595663  | H | 16.019028 | 13.076313 | 12.891657 |
| C | 25.519815 | 13.643120 | 11.048782 | H | 20.534464 | 22.963087 | 8.788758  |
| C | 18.185383 | 7.755992  | 9.142158  | H | 16.502962 | 5.675293  | 8.765918  |
| C | 16.172176 | 8.896634  | 9.978458  | H | 12.245737 | 18.293795 | 9.565769  |
| C | 14.017621 | 10.148191 | 10.391638 | H | 20.151470 | 5.312970  | 8.448078  |
| C | 12.609036 | 12.592134 | 10.590543 | H | 6.620210  | 13.890737 | 9.780212  |
| C | 12.634665 | 15.080160 | 10.871786 | H | 14.710568 | 20.434757 | 9.249965  |
| C | 12.749244 | 17.402006 | 9.941399  | H | 6.561465  | 11.425756 | 9.945565  |
| C | 16.811735 | 7.706626  | 9.466463  | H | 14.406242 | 4.450971  | 8.719005  |
| C | 14.734103 | 8.866481  | 10.312552 | H | 11.974707 | 4.423967  | 8.931732  |
| C | 12.578867 | 10.142647 | 10.390844 | H | 10.568255 | 10.474310 | 12.596444 |
| C | 11.900581 | 11.348248 | 10.536018 | H | 7.359629  | 18.127495 | 10.030718 |
| C | 11.908702 | 13.800983 | 10.597633 | H | 8.427710  | 4.019266  | 10.106107 |
| C | 11.976117 | 16.260468 | 10.212551 | H | 15.800817 | 18.170372 | 13.628907 |
| C | 10.614975 | 16.242470 | 9.967616  | H | 10.152652 | 17.159554 | 9.605905  |
| C | 13.955788 | 7.616638  | 10.061416 | H | 7.681264  | 6.851343  | 9.517947  |
| C | 16.020615 | 6.548022  | 9.208066  | H | 25.991894 | 10.318157 | 7.913747  |
| C | 18.776865 | 6.607725  | 8.386019  | H | 18.223898 | 10.015371 | 12.360821 |
| C | 10.480941 | 13.834731 | 10.407729 | H | 12.911139 | 14.645364 | 12.809500 |
| C | 10.420239 | 11.356097 | 10.806876 | H | 18.018297 | 9.193749  | 14.476410 |
| C | 11.834572 | 8.901780  | 10.166048 | H | 17.500044 | 12.552881 | 14.549454 |
| C | 12.487341 | 7.705611  | 9.913301  | H | 20.379391 | 9.759644  | 14.848695 |
| C | 11.769680 | 6.499329  | 9.566505  | H | 20.731842 | 11.165762 | 13.803343 |
| C | 10.392412 | 8.943372  | 10.098023 | H | 20.696848 | 11.380902 | 15.565966 |
| C | 9.702679  | 10.133204 | 10.290809 | H | 14.478884 | 10.088690 | 13.577261 |
| C | 9.749659  | 12.647131 | 10.418312 | H | 15.691456 | 8.764800  | 13.540319 |
| C | 9.809176  | 15.087676 | 10.140110 | H | 14.986796 | 9.289621  | 15.084850 |

GO-CF<sub>3</sub>\_DK-keto (above)

|   |           |           |           |   |           |           |           |
|---|-----------|-----------|-----------|---|-----------|-----------|-----------|
| C | 19.103014 | 11.103747 | 10.275498 | C | 8.469110  | 15.029574 | 10.273832 |
| C | 18.450140 | 12.302492 | 10.453691 | C | 7.762107  | 13.833723 | 10.251256 |
| C | 19.193819 | 13.570908 | 10.435698 | C | 8.411684  | 12.593586 | 10.402346 |
| C | 20.584526 | 13.573184 | 10.229510 | C | 10.373741 | 6.488476  | 9.415847  |
| C | 21.341450 | 12.313090 | 10.218498 | C | 9.650478  | 7.691245  | 9.718845  |
| C | 20.565603 | 11.032169 | 10.198798 | C | 8.322138  | 10.152814 | 10.205963 |
| C | 18.505428 | 14.821766 | 10.532652 | C | 8.267163  | 7.744642  | 9.629206  |
| C | 21.310369 | 14.774184 | 10.026750 | C | 7.511864  | 8.946099  | 9.882402  |
| C | 20.634670 | 16.000874 | 10.151175 | C | 7.688036  | 11.380698 | 10.272270 |
| C | 19.244673 | 16.047682 | 10.394829 | C | 14.661509 | 6.348118  | 9.468646  |
| C | 21.424631 | 17.242123 | 10.110970 | C | 12.504387 | 5.269404  | 9.078453  |
| C | 22.775633 | 17.192928 | 9.532431  | C | 13.872077 | 5.239398  | 9.051281  |
| C | 23.419409 | 15.976230 | 9.434921  | C | 7.619259  | 16.246296 | 10.113932 |
| C | 22.731850 | 14.747669 | 9.744821  | C | 9.620654  | 5.262837  | 8.999445  |
| C | 23.415073 | 13.528243 | 9.641100  | C | 17.184624 | 17.575623 | 12.440896 |
| C | 22.716824 | 12.310076 | 9.686754  | C | 12.970961 | 11.221805 | 14.797451 |

|   |           |           |           |   |           |           |           |
|---|-----------|-----------|-----------|---|-----------|-----------|-----------|
| C | 17.011518 | 12.315411 | 10.609694 | C | 14.139477 | 12.047657 | 14.372015 |
| C | 16.355278 | 13.586137 | 11.066899 | C | 14.120073 | 13.534313 | 14.766134 |
| C | 17.085182 | 14.859643 | 10.688939 | C | 14.601605 | 13.722239 | 16.184519 |
| C | 16.373798 | 16.047939 | 10.674240 | C | 15.986325 | 14.435125 | 16.318762 |
| C | 17.111416 | 17.355186 | 10.854515 | O | 26.691854 | 13.015759 | 11.168974 |
| C | 18.561512 | 17.312317 | 10.419250 | O | 24.803473 | 14.056875 | 11.880616 |
| C | 20.680904 | 18.551174 | 10.099931 | O | 16.534145 | 13.622533 | 12.533917 |
| C | 19.209965 | 18.501516 | 10.153503 | O | 21.322474 | 18.067917 | 11.318103 |
| C | 24.792765 | 15.926328 | 8.945642  | O | 21.243938 | 22.038113 | 8.972122  |
| C | 25.485113 | 14.764839 | 8.945081  | O | 18.458986 | 5.759195  | 7.720048  |
| C | 21.353775 | 19.726809 | 9.493049  | O | 19.922228 | 5.834250  | 9.445730  |
| C | 23.419235 | 18.421764 | 9.107624  | O | 14.398241 | 7.809252  | 11.440063 |
| C | 22.666496 | 19.647121 | 9.107916  | O | 21.234867 | 11.488850 | 11.432514 |
| C | 18.496471 | 19.735800 | 9.963968  | O | 14.236068 | 19.586275 | 9.814885  |
| C | 17.099592 | 19.718014 | 10.005779 | O | 26.617046 | 17.154675 | 7.978080  |
| C | 16.367756 | 18.563890 | 10.305091 | O | 10.350168 | 11.149532 | 12.422665 |
| C | 14.944778 | 16.063787 | 10.668775 | O | 6.505581  | 16.239191 | 9.607963  |
| C | 14.212034 | 14.878992 | 10.815706 | O | 8.156940  | 17.395437 | 10.628862 |
| C | 14.863642 | 13.630792 | 10.820046 | O | 9.673255  | 4.752194  | 7.891792  |
| C | 16.256859 | 11.155068 | 10.487783 | O | 8.865701  | 4.752288  | 10.012111 |
| C | 16.903494 | 9.897974  | 10.248955 | O | 18.192423 | 17.864641 | 13.048103 |
| C | 18.393785 | 9.794317  | 10.433327 | O | 15.971542 | 17.410830 | 13.026761 |
| C | 21.175507 | 9.867831  | 9.533861  | O | 6.263000  | 8.978863  | 9.824476  |
| C | 22.510847 | 9.926083  | 9.142145  | O | 25.079546 | 9.963016  | 8.168169  |
| C | 23.283342 | 11.102491 | 9.235079  | O | 18.486797 | 9.416409  | 11.867400 |
| C | 19.023327 | 8.655377  | 9.646043  | O | 12.599139 | 15.112553 | 12.579289 |
| C | 20.361948 | 8.751065  | 9.272603  | O | 15.073095 | 11.594908 | 13.713194 |
| C | 24.653994 | 11.141011 | 8.727106  | O | 14.007553 | 13.364682 | 17.183409 |
| C | 25.412212 | 12.254604 | 8.801743  | H | 26.524263 | 14.764285 | 8.604353  |
| C | 25.472010 | 17.182404 | 8.469486  | H | 23.159786 | 20.542662 | 8.726248  |
| C | 24.715727 | 18.402454 | 8.619486  | H | 16.591955 | 20.645452 | 9.717377  |
| C | 20.568150 | 20.922094 | 9.373701  | H | 22.963680 | 9.045097  | 8.685064  |
| C | 19.212934 | 20.919710 | 9.621461  | H | 18.645050 | 21.846825 | 9.493035  |
| C | 14.976254 | 18.499771 | 10.180097 | H | 25.199619 | 19.325720 | 8.294288  |
| C | 14.232680 | 17.311934 | 10.404551 | H | 26.449047 | 12.256867 | 8.460125  |
| C | 14.125617 | 12.447414 | 10.709770 | H | 20.832987 | 7.910782  | 8.760057  |
| C | 14.798512 | 11.193069 | 10.543751 | H | 25.309607 | 14.053406 | 12.722256 |
| C | 24.917931 | 13.491040 | 9.501810  | H | 16.126497 | 12.794352 | 12.913184 |
| C | 25.588446 | 13.470035 | 10.948347 | H | 20.623413 | 22.786156 | 8.894579  |
| C | 18.231453 | 7.513948  | 9.370960  | H | 16.511559 | 5.482328  | 8.925594  |
| C | 16.201967 | 8.734051  | 10.055868 | H | 12.349632 | 18.221220 | 9.933996  |
| C | 14.055784 | 10.025742 | 10.419297 | H | 20.244631 | 5.050798  | 8.948593  |
| C | 12.674233 | 12.478892 | 10.720522 | H | 6.681907  | 13.864927 | 10.100855 |
| C | 12.730275 | 14.952658 | 11.091988 | H | 14.818969 | 20.358391 | 9.698910  |
| C | 12.850565 | 17.305550 | 10.250961 | H | 6.604396  | 11.402132 | 10.127142 |
| C | 16.840534 | 7.510438  | 9.619355  | H | 14.388315 | 4.350320  | 8.680634  |
| C | 14.754903 | 8.734317  | 10.353575 | H | 11.947452 | 4.396394  | 8.738833  |
| C | 12.616833 | 10.038383 | 10.434847 | H | 10.446507 | 10.198562 | 12.632538 |
| C | 11.951666 | 11.244343 | 10.628829 | H | 7.474515  | 18.085136 | 10.479469 |
| C | 11.985461 | 13.690861 | 10.800816 | H | 8.398734  | 3.969924  | 9.644136  |
| C | 12.071480 | 16.156467 | 10.478672 | H | 16.117502 | 17.495365 | 13.993992 |
| C | 10.703129 | 16.164217 | 10.267123 | H | 10.242019 | 17.099047 | 9.952497  |
| C | 13.954736 | 7.496058  | 10.077100 | H | 7.683432  | 6.861729  | 9.368817  |
| C | 16.031757 | 6.370382  | 9.336733  | H | 26.011045 | 10.057210 | 7.895971  |
| C | 18.849262 | 6.306993  | 8.741425  | H | 19.390009 | 9.639802  | 12.172571 |

|                                    |           |           |           |   |           |           |           |
|------------------------------------|-----------|-----------|-----------|---|-----------|-----------|-----------|
| C                                  | 10.556458 | 13.746253 | 10.642451 | H | 13.012571 | 15.974096 | 12.795066 |
| C                                  | 10.477349 | 11.250484 | 10.928334 | H | 13.179318 | 10.155784 | 14.650966 |
| C                                  | 11.856502 | 8.816316  | 10.169283 | H | 12.700249 | 11.441794 | 15.841551 |
| C                                  | 12.494707 | 7.619235  | 9.884115  | H | 12.107849 | 11.516460 | 14.170544 |
| C                                  | 11.765709 | 6.447120  | 9.455344  | H | 13.081778 | 13.892829 | 14.711002 |
| C                                  | 10.416003 | 8.881974  | 10.090290 | H | 14.738482 | 14.093502 | 14.053311 |
| C                                  | 9.739265  | 10.066270 | 10.354786 | F | 15.915552 | 15.684625 | 15.743141 |
| C                                  | 9.812008  | 12.564817 | 10.621771 | F | 16.364248 | 14.592983 | 17.599390 |
| C                                  | 9.891027  | 15.014724 | 10.427893 | F | 16.948221 | 13.735779 | 15.663587 |
| GO-CF <sub>3</sub> DK-enol (above) |           |           |           |   |           |           |           |
| C                                  | 19.038376 | 11.135650 | 10.228582 | C | 8.438540  | 15.134546 | 10.081302 |
| C                                  | 18.390642 | 12.341475 | 10.387562 | C | 7.724533  | 13.941212 | 10.038286 |
| C                                  | 19.145466 | 13.604872 | 10.380880 | C | 8.361112  | 12.696666 | 10.199698 |
| C                                  | 20.540293 | 13.596087 | 10.205475 | C | 10.287515 | 6.555459  | 9.339334  |
| C                                  | 21.285372 | 12.328814 | 10.203346 | C | 9.569242  | 7.768268  | 9.615651  |
| C                                  | 20.500912 | 11.055269 | 10.171838 | C | 8.254608  | 10.250637 | 10.047298 |
| C                                  | 18.462742 | 14.860966 | 10.465639 | C | 8.185729  | 7.828190  | 9.531799  |
| C                                  | 21.282639 | 14.791761 | 10.030980 | C | 7.436941  | 9.037257  | 9.773191  |
| C                                  | 20.613800 | 16.022974 | 10.144861 | C | 7.630546  | 11.485112 | 10.083198 |
| C                                  | 19.216248 | 16.081371 | 10.347393 | C | 14.577243 | 6.400266  | 9.401501  |
| C                                  | 21.413088 | 17.258181 | 10.135345 | C | 12.416508 | 5.325706  | 9.015055  |
| C                                  | 22.788565 | 17.201630 | 9.618624  | C | 13.784137 | 5.291439  | 8.990791  |
| C                                  | 23.424353 | 15.979641 | 9.529627  | C | 7.596746  | 16.356396 | 9.911971  |
| C                                  | 22.712059 | 14.753366 | 9.789330  | C | 9.531162  | 5.319038  | 8.965450  |
| C                                  | 23.381628 | 13.527118 | 9.677528  | C | 17.100796 | 17.748819 | 12.293185 |
| C                                  | 22.667446 | 12.316818 | 9.690811  | C | 12.053338 | 12.777302 | 14.667010 |
| C                                  | 16.949877 | 12.364210 | 10.525617 | C | 13.532704 | 12.781960 | 14.790079 |
| C                                  | 16.283140 | 13.642329 | 10.938711 | C | 14.278274 | 13.900002 | 15.163862 |
| C                                  | 17.038719 | 14.908885 | 10.589686 | C | 15.681431 | 13.777550 | 15.297824 |
| C                                  | 16.340536 | 16.109400 | 10.543484 | C | 16.518009 | 15.002281 | 15.733551 |
| C                                  | 17.081264 | 17.411812 | 10.720995 | O | 26.652834 | 12.958059 | 11.225041 |
| C                                  | 18.542046 | 17.350107 | 10.334660 | O | 24.713409 | 13.870974 | 11.976334 |
| C                                  | 20.676252 | 18.574732 | 10.085073 | O | 16.255096 | 13.644848 | 12.430754 |
| C                                  | 19.205643 | 18.531746 | 10.070619 | O | 21.257259 | 18.089617 | 11.331177 |
| C                                  | 24.817739 | 15.923902 | 9.100845  | O | 21.306055 | 22.045876 | 8.945006  |
| C                                  | 25.489983 | 14.750921 | 9.077999  | O | 18.395456 | 5.782323  | 7.698367  |
| C                                  | 21.384045 | 19.743269 | 9.505956  | O | 19.831125 | 5.852949  | 9.447342  |
| C                                  | 23.461811 | 18.429895 | 9.238987  | O | 14.304543 | 7.875498  | 11.358898 |
| C                                  | 22.717014 | 19.658503 | 9.198650  | O | 21.155493 | 11.505528 | 11.417187 |
| C                                  | 18.503622 | 19.758791 | 9.804460  | O | 14.236515 | 19.654720 | 9.628044  |
| C                                  | 17.106134 | 19.743608 | 9.781782  | O | 26.722498 | 17.158131 | 8.313004  |
| C                                  | 16.358315 | 18.611576 | 10.117040 | O | 10.264844 | 11.266952 | 12.243384 |
| C                                  | 14.916362 | 16.135450 | 10.506781 | O | 6.495309  | 16.356905 | 9.379643  |
| C                                  | 14.174478 | 14.950473 | 10.623981 | O | 8.126010  | 17.499470 | 10.446943 |
| C                                  | 14.807312 | 13.697330 | 10.636984 | O | 9.589382  | 4.762495  | 7.880188  |
| C                                  | 16.190926 | 11.204543 | 10.407323 | O | 8.768302  | 4.852432  | 9.993350  |
| C                                  | 16.833315 | 9.942717  | 10.183806 | O | 17.964260 | 18.405756 | 12.834736 |
| C                                  | 18.319567 | 9.831659  | 10.387787 | O | 16.011106 | 17.254190 | 12.915623 |
| C                                  | 21.110567 | 9.885448  | 9.514927  | O | 6.186861  | 9.067445  | 9.752018  |
| C                                  | 22.447998 | 9.937434  | 9.130340  | O | 25.014875 | 9.970822  | 8.151527  |
| C                                  | 23.227184 | 11.108978 | 9.232923  | O | 18.389315 | 9.469083  | 11.828475 |
| C                                  | 18.950804 | 8.683941  | 9.616087  | O | 12.611140 | 15.222839 | 12.408963 |
| C                                  | 20.293442 | 8.771331  | 9.253312  | O | 14.128044 | 11.631905 | 14.527154 |

|   |           |           |           |   |            |           |           |
|---|-----------|-----------|-----------|---|------------|-----------|-----------|
| C | 24.600864 | 11.141973 | 8.732787  | O | 16.336285  | 12.716491 | 15.112214 |
| C | 25.370720 | 12.245616 | 8.834067  | H | 26.542692  | 14.747522 | 8.781921  |
| C | 25.541412 | 17.184536 | 8.710205  | H | 23.2339 00 | 20.550417 | 8.840562  |
| C | 24.784042 | 18.406761 | 8.825818  | H | 16.613686  | 20.655645 | 9.426583  |
| C | 20.606876 | 20.934521 | 9.317537  | H | 22.899117  | 9.055140  | 8.674011  |
| C | 19.237469 | 20.932493 | 9.470324  | H | 18.678524  | 21.854874 | 9.283041  |
| C | 14.963535 | 18.564587 | 10.007996 | H | 25.292479  | 19.330486 | 8.541909  |
| C | 14.209594 | 17.389257 | 10.260745 | H | 26.409534  | 12.245381 | 8.498446  |
| C | 14.067160 | 12.513824 | 10.557052 | H | 20.763823  | 7.925893  | 8.748437  |
| C | 14.733762 | 11.252358 | 10.439365 | H | 25.208771  | 13.830321 | 12.823549 |
| C | 24.885469 | 13.468142 | 9.566582  | H | 17.118759  | 13.322719 | 12.761919 |
| C | 25.534058 | 13.380618 | 11.019362 | H | 20.690321  | 22.789968 | 8.811171  |
| C | 18.155472 | 7.545133  | 9.339233  | H | 16.428310  | 5.519023  | 8.887085  |
| C | 16.126781 | 8.781240  | 9.990512  | H | 12.327146  | 18.320232 | 9.838339  |
| C | 13.983935 | 10.087520 | 10.318426 | H | 20.154932  | 5.064025  | 8.959773  |
| C | 12.617818 | 12.552688 | 10.550249 | H | 6.647208   | 13.981226 | 9.869727  |
| C | 12.701764 | 15.026972 | 10.926453 | H | 14.821196  | 20.430738 | 9.553432  |
| C | 12.825845 | 17.397930 | 10.139139 | H | 6.547137   | 11.512028 | 9.937326  |
| C | 16.761839 | 7.550215  | 9.570500  | H | 14.297966  | 4.396505  | 8.631251  |
| C | 14.676304 | 8.791723  | 10.271286 | H | 11.858172  | 4.450167  | 8.684813  |
| C | 12.546524 | 10.109414 | 10.305848 | H | 10.555511  | 10.366816 | 12.496679 |
| C | 11.888851 | 11.324306 | 10.471506 | H | 7.450467   | 18.193432 | 10.286530 |
| C | 11.941969 | 13.773495 | 10.619869 | H | 8.300525   | 4.057729  | 9.654140  |
| C | 12.042149 | 16.251638 | 10.360062 | H | 16.083725  | 17.476471 | 13.869815 |
| C | 10.676785 | 16.265339 | 10.142497 | H | 10.220367  | 17.208019 | 9.845239  |
| C | 13.871284 | 7.556283  | 9.994309  | H | 7.594898   | 6.942918  | 9.296997  |
| C | 15.948903 | 6.413407  | 9.284860  | H | 25.948599  | 10.059116 | 7.885190  |
| C | 18.773762 | 6.330836  | 8.723604  | H | 19.317709  | 9.588565  | 12.116780 |
| C | 10.511242 | 13.837716 | 10.459209 | H | 13.401286  | 14.788555 | 12.794467 |
| C | 10.412005 | 11.344596 | 10.754127 | H | 11.633292  | 12.050597 | 15.380590 |
| C | 11.780403 | 8.890127  | 10.047976 | H | 13.776056  | 14.841635 | 15.369607 |
| C | 12.413586 | 7.685513  | 9.787233  | H | 11.629192  | 13.768925 | 14.857865 |
| C | 11.680182 | 6.510466  | 9.375570  | H | 11.745948  | 12.444993 | 13.662429 |
| C | 10.340816 | 8.963308  | 9.958164  | H | 15.136410  | 11.792372 | 14.675342 |
| C | 9.671054  | 10.156651 | 10.194605 | F | 15.793997  | 16.174652 | 15.721979 |
| C | 9.760015  | 12.661925 | 10.431339 | F | 16.984127  | 14.834651 | 16.998636 |
| C | 9.856535  | 15.112592 | 10.260110 | F | 17.586346  | 15.188016 | 14.916745 |

GO-MAA-keto (above)

|   |           |           |           |   |           |           |           |
|---|-----------|-----------|-----------|---|-----------|-----------|-----------|
| C | 19.061386 | 11.068879 | 10.282225 | C | 7.712171  | 13.746196 | 10.107909 |
| C | 18.402758 | 12.264870 | 10.461917 | C | 8.365437  | 12.509245 | 10.262653 |
| C | 19.142767 | 13.535567 | 10.458439 | C | 10.359422 | 6.372082  | 9.495758  |
| C | 20.536787 | 13.542903 | 10.269415 | C | 9.629974  | 7.584613  | 9.742876  |
| C | 21.295879 | 12.284192 | 10.249815 | C | 8.290115  | 10.060756 | 10.129341 |
| C | 20.524220 | 11.002756 | 10.211476 | C | 8.246769  | 7.629632  | 9.649092  |
| C | 18.447592 | 14.782857 | 10.550341 | C | 7.486754  | 8.838365  | 9.850897  |
| C | 21.264193 | 14.746976 | 10.094184 | C | 7.650189  | 11.287792 | 10.159284 |
| C | 20.582121 | 15.970398 | 10.217236 | C | 14.650976 | 6.274348  | 9.509317  |
| C | 19.185987 | 16.011620 | 10.425566 | C | 12.500360 | 5.159031  | 9.185185  |
| C | 21.369043 | 17.214607 | 10.216639 | C | 13.868036 | 5.143763  | 9.139596  |
| C | 22.739408 | 17.176855 | 9.683934  | C | 7.546150  | 16.157795 | 9.993859  |
| C | 23.386942 | 15.962269 | 9.577897  | C | 9.612242  | 5.118997  | 9.160412  |
| C | 22.691917 | 14.726461 | 9.838819  | C | 17.048334 | 17.442793 | 12.409076 |
| C | 23.374310 | 13.509089 | 9.712725  | C | 12.356636 | 13.027865 | 14.905243 |

|   |           |           |           |   |           |           |           |
|---|-----------|-----------|-----------|---|-----------|-----------|-----------|
| C | 22.673399 | 12.291031 | 9.724511  | C | 13.812024 | 12.938302 | 14.585663 |
| C | 16.962725 | 12.272016 | 10.602757 | C | 14.800345 | 13.743879 | 15.444956 |
| C | 16.286835 | 13.538954 | 11.042127 | C | 14.908069 | 15.204810 | 15.040292 |
| C | 17.024029 | 14.814062 | 10.688828 | C | 17.359388 | 15.088236 | 15.309468 |
| C | 16.307665 | 16.000586 | 10.639258 | O | 26.665956 | 12.963153 | 11.223212 |
| C | 17.037064 | 17.317383 | 10.813435 | O | 24.731655 | 13.865973 | 11.998075 |
| C | 18.499670 | 17.273804 | 10.430660 | O | 16.396049 | 13.550154 | 12.529025 |
| C | 20.622576 | 18.522467 | 10.196102 | O | 21.221636 | 18.024876 | 11.431457 |
| C | 19.151501 | 18.467470 | 10.191718 | O | 21.217300 | 22.030075 | 9.155489  |
| C | 24.774910 | 15.924216 | 9.129390  | O | 18.438725 | 5.714430  | 7.725221  |
| C | 25.461399 | 14.759782 | 9.094697  | O | 19.917276 | 5.809159  | 9.436931  |
| C | 21.313599 | 19.709301 | 9.634001  | O | 14.378916 | 7.777556  | 11.448063 |
| C | 23.395357 | 18.415075 | 9.307135  | O | 21.186602 | 11.445660 | 11.455557 |
| C | 22.641006 | 19.639139 | 9.300719  | O | 14.184728 | 19.517374 | 9.662922  |
| C | 18.437590 | 19.696362 | 9.976931  | O | 26.649458 | 17.181206 | 8.307084  |
| C | 17.039150 | 19.667240 | 9.952771  | O | 10.311696 | 11.144760 | 12.306789 |
| C | 16.304708 | 18.510147 | 10.230161 | O | 6.406376  | 16.134192 | 9.549162  |
| C | 14.879472 | 16.015720 | 10.607279 | O | 8.100817  | 17.322586 | 10.451318 |
| C | 14.151195 | 14.827897 | 10.738095 | O | 9.667461  | 4.532984  | 8.090537  |
| C | 14.807077 | 13.581469 | 10.747193 | O | 8.859747  | 4.673499  | 10.205677 |
| C | 16.215588 | 11.107688 | 10.464876 | O | 18.031012 | 17.225258 | 13.090033 |
| C | 16.869423 | 9.853014  | 10.235966 | O | 15.824649 | 17.732626 | 12.886839 |
| C | 18.357561 | 9.755454  | 10.430683 | O | 6.237699  | 8.862050  | 9.789498  |
| C | 21.139345 | 9.846875  | 9.535592  | O | 25.032099 | 9.980539  | 8.147760  |
| C | 22.473083 | 9.915318  | 9.141851  | O | 18.443104 | 9.376577  | 11.866895 |
| C | 23.241360 | 11.093323 | 9.250700  | O | 12.478882 | 14.965583 | 12.453356 |
| C | 18.994537 | 8.621184  | 9.643154  | O | 14.257982 | 12.219560 | 13.692298 |
| C | 20.331507 | 8.727435  | 9.267420  | O | 13.949483 | 15.892165 | 14.717937 |
| C | 24.610445 | 11.144069 | 8.739697  | O | 16.118362 | 15.812010 | 15.093214 |
| C | 25.369621 | 12.254926 | 8.841025  | H | 26.509907 | 14.769409 | 8.784107  |
| C | 25.477030 | 17.194334 | 8.730313  | H | 23.147022 | 20.541737 | 8.953897  |
| C | 24.710438 | 18.408113 | 8.870488  | H | 16.538416 | 20.591736 | 9.643499  |
| C | 20.527672 | 20.902843 | 9.501040  | H | 22.928539 | 9.041961  | 8.672818  |
| C | 19.161945 | 20.889088 | 9.681051  | H | 18.595406 | 21.814817 | 9.537342  |
| C | 14.915807 | 18.440567 | 10.070210 | H | 25.205076 | 19.339186 | 8.586203  |
| C | 14.168256 | 17.258907 | 10.313414 | H | 26.405586 | 12.267240 | 8.496785  |
| C | 14.078093 | 12.395892 | 10.619781 | H | 20.806664 | 7.892841  | 8.749384  |
| C | 14.757332 | 11.140965 | 10.490728 | H | 25.239697 | 13.826268 | 12.837691 |
| C | 24.877920 | 13.467805 | 9.585625  | H | 15.727650 | 12.898488 | 12.875143 |
| C | 25.542931 | 13.380764 | 11.029648 | H | 20.596504 | 22.775198 | 9.055766  |
| C | 18.209949 | 7.473508  | 9.369925  | H | 16.505541 | 5.414820  | 8.970708  |
| C | 16.174547 | 8.684359  | 10.044798 | H | 12.286418 | 18.164310 | 9.835220  |
| C | 14.020812 | 9.968685  | 10.374278 | H | 20.241903 | 5.027418  | 8.938658  |
| C | 12.627971 | 12.419623 | 10.592927 | H | 6.630920  | 13.773990 | 9.963588  |
| C | 12.663662 | 14.886877 | 10.987774 | H | 14.769599 | 20.288301 | 9.549504  |
| C | 12.787528 | 17.250483 | 10.157249 | H | 6.566265  | 11.299064 | 10.015171 |
| C | 16.819960 | 7.460485  | 9.621459  | H | 14.389260 | 4.247463  | 8.794013  |
| C | 14.727110 | 8.679867  | 10.338509 | H | 11.949503 | 4.267632  | 8.886059  |
| C | 12.582212 | 9.972990  | 10.369474 | H | 10.701143 | 10.290358 | 12.583938 |
| C | 11.912354 | 11.181538 | 10.519423 | H | 7.404652  | 18.002731 | 10.324347 |
| C | 11.932727 | 13.625230 | 10.646914 | H | 8.398182  | 3.865314  | 9.890623  |
| C | 12.009831 | 16.099524 | 10.382090 | H | 15.813062 | 17.502069 | 13.847365 |
| C | 10.644784 | 16.101934 | 10.150805 | H | 10.182408 | 17.038120 | 9.843124  |
| C | 13.936763 | 7.431679  | 10.091356 | H | 7.666054  | 6.734744  | 9.425341  |
| C | 16.019541 | 6.307868  | 9.363757  | H | 25.963551 | 10.079691 | 7.877466  |

|                     |           |           |           |   |           |           |           |
|---------------------|-----------|-----------|-----------|---|-----------|-----------|-----------|
| C                   | 18.833271 | 6.270274  | 8.740747  | H | 19.365616 | 9.536019  | 12.154053 |
| C                   | 10.503755 | 13.676522 | 10.485973 | H | 13.072125 | 15.652356 | 12.828848 |
| C                   | 10.438643 | 11.190063 | 10.816439 | H | 11.758774 | 12.511318 | 14.145170 |
| C                   | 11.829163 | 8.739132  | 10.140819 | H | 12.178505 | 12.587120 | 15.901499 |
| C                   | 12.474955 | 7.537283  | 9.898652  | H | 12.064185 | 14.087110 | 14.961734 |
| C                   | 11.752458 | 6.343249  | 9.523496  | H | 15.769629 | 13.234711 | 15.407353 |
| C                   | 10.388618 | 8.794225  | 10.060537 | H | 14.451157 | 13.749704 | 16.491745 |
| C                   | 9.706957  | 9.984089  | 10.281034 | H | 17.367310 | 14.625805 | 16.306530 |
| C                   | 9.766371  | 12.492651 | 10.476908 | H | 17.501713 | 14.346950 | 14.511298 |
| C                   | 9.834485  | 14.944345 | 10.283898 | H | 18.138699 | 15.853026 | 15.236462 |
| C                   | 8.411754  | 14.948785 | 10.132990 |   |           |           |           |
| GO-MAA-enol (above) |           |           |           |   |           |           |           |
| C                   | 19.006306 | 11.148549 | 10.388661 | C | 7.675857  | 13.885193 | 9.987345  |
| C                   | 18.346615 | 12.351965 | 10.498837 | C | 8.319180  | 12.648543 | 10.177774 |
| C                   | 19.089144 | 13.621012 | 10.447345 | C | 10.287026 | 6.496112  | 9.506734  |
| C                   | 20.481934 | 13.620281 | 10.258856 | C | 9.559041  | 7.713747  | 9.731022  |
| C                   | 21.241446 | 12.363478 | 10.290977 | C | 8.226040  | 10.199892 | 10.066377 |
| C                   | 20.470812 | 11.076682 | 10.336624 | C | 8.178027  | 7.764675  | 9.611526  |
| C                   | 18.399519 | 14.873850 | 10.500395 | C | 7.419362  | 8.977246  | 9.798255  |
| C                   | 21.211958 | 14.818061 | 10.050782 | C | 7.596634  | 11.431234 | 10.065738 |
| C                   | 20.538166 | 16.046957 | 10.160608 | C | 14.574692 | 6.366945  | 9.634434  |
| C                   | 19.144251 | 16.098156 | 10.371828 | C | 12.425857 | 5.269211  | 9.250435  |
| C                   | 21.334438 | 17.284552 | 10.152922 | C | 13.793867 | 5.242605  | 9.244166  |
| C                   | 22.697006 | 17.234369 | 9.601756  | C | 7.520986  | 16.291330 | 9.824588  |
| C                   | 23.333372 | 16.014278 | 9.495152  | C | 9.542253  | 5.242048  | 9.168156  |
| C                   | 22.635942 | 14.786237 | 9.785979  | C | 17.029524 | 17.526283 | 12.369319 |
| C                   | 23.313719 | 13.563184 | 9.685737  | C | 12.761381 | 11.934957 | 14.425436 |
| C                   | 22.613358 | 12.347065 | 9.753302  | C | 14.219130 | 11.968522 | 14.720412 |
| C                   | 16.902807 | 12.368726 | 10.629816 | C | 14.910508 | 13.117646 | 15.035954 |
| C                   | 16.234692 | 13.656775 | 11.009136 | C | 16.338625 | 13.062788 | 15.240551 |
| C                   | 16.977308 | 14.915714 | 10.618202 | C | 18.348680 | 14.303511 | 15.400398 |
| C                   | 16.266857 | 16.106789 | 10.574078 | O | 26.595663 | 13.013741 | 11.192171 |
| C                   | 17.004461 | 17.413668 | 10.775567 | O | 24.716185 | 14.056170 | 11.925668 |
| C                   | 18.467005 | 17.364622 | 10.385589 | O | 16.382727 | 13.749994 | 12.486950 |
| C                   | 20.599241 | 18.597094 | 10.145779 | O | 21.205917 | 18.089399 | 11.373944 |
| C                   | 19.126919 | 18.554976 | 10.154467 | O | 21.217646 | 22.110001 | 9.142640  |
| C                   | 24.711906 | 15.960399 | 9.021553  | O | 18.393486 | 5.807466  | 7.896208  |
| C                   | 25.392923 | 14.791991 | 9.002090  | O | 19.802530 | 5.835309  | 9.668547  |
| C                   | 21.295343 | 19.780704 | 9.582657  | O | 14.264346 | 7.884711  | 11.554395 |
| C                   | 23.356701 | 18.465237 | 9.208714  | O | 21.135595 | 11.590174 | 11.534623 |
| C                   | 22.615030 | 19.697901 | 9.222807  | O | 14.165276 | 19.638285 | 9.641503  |
| C                   | 18.422174 | 19.792915 | 9.960116  | O | 26.567390 | 17.192034 | 8.121346  |
| C                   | 17.023483 | 19.775852 | 9.944523  | O | 10.173495 | 11.270345 | 12.285862 |
| C                   | 16.280315 | 18.619795 | 10.206646 | O | 6.390999  | 16.254940 | 9.356473  |
| C                   | 14.842945 | 16.125763 | 10.551216 | O | 8.068558  | 17.471785 | 10.249652 |
| C                   | 14.106537 | 14.940376 | 10.699235 | O | 9.620624  | 4.641442  | 8.107862  |
| C                   | 14.753282 | 13.692504 | 10.739048 | O | 8.765330  | 4.813453  | 10.202162 |
| C                   | 16.150969 | 11.203105 | 10.547090 | O | 18.008204 | 17.330687 | 13.057952 |
| C                   | 16.805304 | 9.938108  | 10.365644 | O | 15.802208 | 17.819229 | 12.874042 |
| C                   | 18.294340 | 9.842925  | 10.577546 | O | 6.170633  | 9.004004  | 9.738468  |
| C                   | 21.082903 | 9.894211  | 9.704830  | O | 24.944317 | 9.984365  | 8.214504  |
| C                   | 22.411434 | 9.946931  | 9.288455  | O | 18.485596 | 9.458395  | 11.994987 |
| C                   | 23.178310 | 11.129972 | 9.326048  | O | 12.500862 | 15.140713 | 12.461864 |

|   |           |           |           |   |           |           |           |
|---|-----------|-----------|-----------|---|-----------|-----------|-----------|
| C | 18.930660 | 8.683463  | 9.828142  | O | 14.831429 | 10.784950 | 14.633142 |
| C | 20.272301 | 8.770445  | 9.469192  | O | 17.014746 | 12.010067 | 15.175838 |
| C | 24.535265 | 11.164664 | 8.780809  | O | 16.904434 | 14.270422 | 15.459825 |
| C | 25.294003 | 12.279835 | 8.827741  | H | 26.434616 | 14.789214 | 8.669184  |
| C | 25.410625 | 17.219664 | 8.584553  | H | 23.124378 | 20.597668 | 8.873314  |
| C | 24.660915 | 18.442991 | 8.741604  | H | 16.528135 | 20.709000 | 9.652639  |
| C | 20.520237 | 20.984818 | 9.477843  | H | 22.860550 | 9.054406  | 8.850354  |
| C | 19.156624 | 20.982405 | 9.674175  | H | 18.598604 | 21.916142 | 9.549969  |
| C | 14.892375 | 18.555641 | 10.040078 | H | 25.158916 | 19.367516 | 8.442186  |
| C | 14.137535 | 17.374971 | 10.274659 | H | 26.321348 | 12.281853 | 8.458565  |
| C | 14.017002 | 12.503027 | 10.671176 | H | 20.745121 | 7.919516  | 8.975617  |
| C | 14.691755 | 11.242566 | 10.574151 | H | 25.226381 | 14.039026 | 12.764561 |
| C | 24.815346 | 13.515878 | 9.540031  | H | 15.542808 | 13.451650 | 12.907075 |
| C | 25.493265 | 13.475362 | 10.983128 | H | 20.603735 | 22.862783 | 9.058848  |
| C | 18.140587 | 7.541757  | 9.564074  | H | 16.436766 | 5.488568  | 9.155867  |
| C | 16.102232 | 8.770436  | 10.188730 | H | 12.255315 | 18.283407 | 9.803362  |
| C | 13.949684 | 10.072078 | 10.463341 | H | 20.131054 | 5.052569  | 9.174122  |
| C | 12.566481 | 12.536486 | 10.636853 | H | 6.600926  | 13.914577 | 9.802835  |
| C | 12.625309 | 15.012707 | 10.974159 | H | 14.755619 | 20.403536 | 9.517088  |
| C | 12.756098 | 17.370228 | 10.128073 | H | 6.516473  | 11.450878 | 9.895962  |
| C | 16.746780 | 7.538156  | 9.795954  | H | 14.317100 | 4.341364  | 8.915072  |
| C | 14.649075 | 8.778774  | 10.452098 | H | 11.876348 | 4.382287  | 8.936494  |
| C | 12.512074 | 10.087236 | 10.426128 | H | 10.355114 | 10.346382 | 12.552911 |
| C | 11.845069 | 11.301341 | 10.556077 | H | 7.376171  | 18.146856 | 10.081110 |
| C | 11.879274 | 13.751998 | 10.669874 | H | 8.307912  | 4.002237  | 9.888842  |
| C | 11.973903 | 16.221085 | 10.359353 | H | 15.897973 | 17.783377 | 13.850183 |
| C | 10.612770 | 16.227936 | 10.108063 | H | 10.162382 | 17.163099 | 9.780678  |
| C | 13.855066 | 7.533194  | 10.190798 | H | 7.597145  | 6.870366  | 9.386029  |
| C | 15.946959 | 6.388266  | 9.528775  | H | 25.870382 | 10.074152 | 7.922971  |
| C | 18.761614 | 6.332041  | 8.937188  | H | 18.128759 | 10.183956 | 12.549082 |
| C | 10.455199 | 13.808523 | 10.466866 | H | 12.978112 | 15.960239 | 12.707194 |
| C | 10.361159 | 11.319126 | 10.804340 | H | 12.236311 | 11.349345 | 15.196241 |
| C | 11.757037 | 8.857527  | 10.179565 | H | 14.388994 | 14.069378 | 15.102339 |
| C | 12.399965 | 7.650187  | 9.958228  | H | 12.333526 | 12.942364 | 14.371828 |
| C | 11.678926 | 6.459623  | 9.566614  | H | 12.583980 | 11.431736 | 13.463942 |
| C | 10.318926 | 8.921336  | 10.057940 | H | 15.812282 | 10.972182 | 14.849037 |
| C | 9.639472  | 10.116814 | 10.249072 | H | 18.785660 | 13.696397 | 16.205067 |
| C | 9.711374  | 12.626396 | 10.438733 | H | 18.687674 | 13.923864 | 14.426202 |
| C | 9.795228  | 15.075529 | 10.228276 | H | 18.617243 | 15.359410 | 15.510437 |
| C | 8.378551  | 15.084539 | 10.022293 |   |           |           |           |

GO-DMM-keto (above)

|   |           |           |           |   |           |           |           |
|---|-----------|-----------|-----------|---|-----------|-----------|-----------|
| C | 19.032293 | 11.176253 | 10.444770 | C | 7.721860  | 13.977970 | 9.972965  |
| C | 18.382723 | 12.382836 | 10.577738 | C | 8.357008  | 12.736036 | 10.170902 |
| C | 19.133213 | 13.645385 | 10.538548 | C | 10.289912 | 6.566485  | 9.546287  |
| C | 20.524639 | 13.638542 | 10.334272 | C | 9.568312  | 7.789475  | 9.760056  |
| C | 21.277519 | 12.377162 | 10.339182 | C | 8.249973  | 10.286218 | 10.078040 |
| C | 20.495275 | 11.092092 | 10.377482 | C | 8.188232  | 7.848875  | 9.634893  |
| C | 18.448605 | 14.902702 | 10.602036 | C | 7.436798  | 9.066964  | 9.814009  |
| C | 21.259384 | 14.833675 | 10.120066 | C | 7.628304  | 11.521524 | 10.063965 |
| C | 20.592068 | 16.066906 | 10.231811 | C | 14.574913 | 6.413001  | 9.691244  |
| C | 19.199081 | 16.125256 | 10.453068 | C | 12.420205 | 5.319595  | 9.326170  |
| C | 21.394966 | 17.301043 | 10.209459 | C | 13.788107 | 5.285744  | 9.321454  |
| C | 22.754700 | 17.242207 | 9.651797  | C | 7.600413  | 16.393127 | 9.824900  |



|   |           |           |           |   |           |           |           |
|---|-----------|-----------|-----------|---|-----------|-----------|-----------|
| C | 23.382771 | 16.018263 | 9.541585  | C | 9.539257  | 5.321622  | 9.188077  |
| C | 22.679575 | 14.794861 | 9.838151  | C | 17.070648 | 17.646471 | 12.402699 |
| C | 23.349274 | 13.567547 | 9.722105  | C | 16.149973 | 11.217191 | 14.508394 |
| C | 22.641594 | 12.357303 | 9.783403  | C | 17.211514 | 11.814939 | 15.409398 |
| C | 16.939014 | 12.406839 | 10.703012 | C | 18.250221 | 12.591898 | 14.614552 |
| C | 16.261410 | 13.690346 | 11.087637 | C | 19.329103 | 14.675541 | 14.379167 |
| C | 17.026213 | 14.950249 | 10.733451 | C | 13.806633 | 11.110780 | 14.109006 |
| C | 16.323124 | 16.150976 | 10.652893 | O | 26.638918 | 13.002866 | 11.204947 |
| C | 17.063499 | 17.463242 | 10.821615 | O | 24.763756 | 14.039596 | 11.956681 |
| C | 18.529819 | 17.396465 | 10.446318 | O | 16.300884 | 13.682744 | 12.592954 |
| C | 20.666628 | 18.619009 | 10.192465 | O | 21.272287 | 18.118227 | 11.423453 |
| C | 19.195139 | 18.581656 | 10.197349 | O | 21.301020 | 22.120150 | 9.151035  |
| C | 24.757071 | 15.956830 | 9.054615  | O | 18.364506 | 5.832019  | 7.900732  |
| C | 25.431458 | 14.785188 | 9.027603  | O | 19.805050 | 5.877304  | 9.646837  |
| C | 21.367672 | 19.794809 | 9.618382  | O | 14.277530 | 7.958251  | 11.595123 |
| C | 23.420347 | 18.467041 | 9.249343  | O | 21.187365 | 11.580407 | 11.562788 |
| C | 22.686329 | 19.703424 | 9.258702  | O | 14.244781 | 19.677223 | 9.616879  |
| C | 18.496563 | 19.818048 | 9.972446  | O | 26.612854 | 17.173939 | 8.134226  |
| C | 17.098846 | 19.803875 | 9.933638  | O | 10.215398 | 11.366677 | 12.293245 |
| C | 16.350550 | 18.655212 | 10.207232 | O | 6.528819  | 16.404318 | 9.235394  |
| C | 14.903467 | 16.176979 | 10.585484 | O | 8.101604  | 17.525116 | 10.411038 |
| C | 14.156692 | 14.991662 | 10.704783 | O | 9.613710  | 4.742766  | 8.115650  |
| C | 14.794299 | 13.741020 | 10.747705 | O | 8.760238  | 4.877082  | 10.213708 |
| C | 16.179552 | 11.249899 | 10.573903 | O | 18.030582 | 17.442827 | 13.116673 |
| C | 16.824301 | 9.982718  | 10.379845 | O | 15.851347 | 18.015305 | 12.877712 |
| C | 18.310911 | 9.866357  | 10.602808 | O | 6.188386  | 9.100588  | 9.750926  |
| C | 21.090988 | 9.920087  | 9.710189  | O | 24.950850 | 9.990144  | 8.214030  |
| C | 22.418234 | 9.966689  | 9.286833  | O | 18.503233 | 9.442271  | 11.986715 |
| C | 23.195686 | 11.140118 | 9.338778  | O | 12.556650 | 15.197230 | 12.461009 |
| C | 18.934891 | 8.721321  | 9.817970  | O | 16.362167 | 10.449447 | 13.580483 |
| C | 20.273706 | 8.805893  | 9.453501  | O | 18.905954 | 12.135142 | 13.697683 |
| C | 24.551249 | 11.168547 | 8.791150  | O | 18.368469 | 13.854012 | 15.090070 |
| C | 25.319347 | 12.276697 | 8.847449  | O | 14.919248 | 11.616890 | 14.890872 |
| C | 25.461016 | 17.210648 | 8.609521  | H | 26.470079 | 14.776948 | 8.685246  |
| C | 24.720695 | 18.437616 | 8.771929  | H | 23.198568 | 20.597935 | 8.900146  |
| C | 20.598757 | 21.000702 | 9.495279  | H | 16.610067 | 20.732044 | 9.615994  |
| C | 19.234203 | 21.003288 | 9.678862  | H | 22.854910 | 9.077212  | 8.830479  |
| C | 14.964077 | 18.596767 | 10.035538 | H | 18.677938 | 21.935272 | 9.535518  |
| C | 14.204289 | 17.424290 | 10.285448 | H | 25.219387 | 19.359343 | 8.465352  |
| C | 14.051516 | 12.556539 | 10.660987 | H | 26.346954 | 12.273739 | 8.478910  |
| C | 14.721153 | 11.295797 | 10.576342 | H | 20.741785 | 7.960806  | 8.945358  |
| C | 24.849670 | 13.511816 | 9.566454  | H | 25.281687 | 14.017366 | 12.790746 |
| C | 25.534651 | 13.464246 | 11.004963 | H | 15.499880 | 14.164236 | 12.889642 |
| C | 18.140724 | 7.582050  | 9.557236  | H | 20.688574 | 22.872398 | 9.052956  |
| C | 16.114183 | 8.818987  | 10.204447 | H | 16.429352 | 5.526908  | 9.197151  |
| C | 13.971415 | 10.129042 | 10.469931 | H | 12.333549 | 18.340935 | 9.788224  |
| C | 12.603431 | 12.598366 | 10.621542 | H | 20.124050 | 5.090798  | 9.152325  |
| C | 12.674228 | 15.072797 | 10.968843 | H | 6.648579  | 14.013512 | 9.779350  |
| C | 12.824014 | 17.426682 | 10.125540 | H | 14.840494 | 20.436878 | 9.484342  |
| C | 16.750475 | 7.583231  | 9.810141  | H | 6.549241  | 11.545312 | 9.888008  |
| C | 14.663544 | 8.833651  | 10.475325 | H | 14.307078 | 4.377391  | 9.005239  |
| C | 12.534877 | 10.150512 | 10.434343 | H | 11.866259 | 4.430483  | 9.025801  |
| C | 11.874076 | 11.369057 | 10.553385 | H | 10.447088 | 10.458304 | 12.574398 |
| C | 11.923109 | 13.818298 | 10.659374 | H | 7.435616  | 18.223040 | 10.229498 |
| C | 12.030867 | 16.285509 | 10.356450 | H | 8.296658  | 4.075868  | 9.884107  |

|                     |           |           |           |   |           |           |           |
|---------------------|-----------|-----------|-----------|---|-----------|-----------|-----------|
| C                   | 10.668404 | 16.300922 | 10.109042 | H | 15.940681 | 18.049883 | 13.854214 |
| C                   | 13.862565 | 7.589356  | 10.235924 | H | 10.221541 | 17.239399 | 9.783836  |
| C                   | 15.945707 | 6.431432  | 9.566862  | H | 7.602109  | 6.957238  | 9.411994  |
| C                   | 18.750738 | 6.368063  | 8.929779  | H | 25.876793 | 10.076502 | 7.921144  |
| C                   | 10.500392 | 13.882071 | 10.462956 | H | 17.925354 | 9.986930  | 12.580566 |
| C                   | 10.392152 | 11.397470 | 10.810052 | H | 12.714835 | 16.139475 | 12.673319 |
| C                   | 11.772063 | 8.922843  | 10.205439 | H | 17.740202 | 10.973010 | 15.884069 |
| C                   | 12.408010 | 7.709270  | 10.002384 | H | 16.756824 | 12.441321 | 16.183266 |
| C                   | 11.680332 | 6.519293  | 9.621551  | H | 20.315088 | 14.191428 | 14.375080 |
| C                   | 10.334257 | 8.994065  | 10.083360 | H | 18.991825 | 14.829247 | 13.346928 |
| C                   | 9.662009  | 10.194740 | 10.266779 | H | 19.351923 | 15.630672 | 14.911982 |
| C                   | 9.747784  | 12.705287 | 10.436552 | H | 13.724112 | 11.687773 | 13.179031 |
| C                   | 9.847902  | 15.152208 | 10.230034 | H | 13.950085 | 10.048331 | 13.871318 |
| C                   | 8.433710  | 15.170297 | 10.019539 | H | 12.917967 | 11.270303 | 14.728242 |
| GO-DMM-enol (above) |           |           |           |   |           |           |           |
| C                   | 19.090473 | 11.041481 | 10.289118 | C | 7.784678  | 13.804538 | 9.842266  |
| C                   | 18.434034 | 12.239147 | 10.465389 | C | 8.415552  | 12.558519 | 10.010960 |
| C                   | 19.174095 | 13.508273 | 10.464756 | C | 10.394517 | 6.448123  | 9.081779  |
| C                   | 20.564941 | 13.515206 | 10.255488 | C | 9.662504  | 7.653071  | 9.353525  |
| C                   | 21.326488 | 12.258582 | 10.241643 | C | 8.324110  | 10.119678 | 9.788820  |
| C                   | 20.554533 | 10.973779 | 10.225467 | C | 8.284425  | 7.714209  | 9.202852  |
| C                   | 18.484116 | 14.755255 | 10.588457 | C | 7.522837  | 8.916261  | 9.436184  |
| C                   | 21.286987 | 14.718837 | 10.062925 | C | 7.694431  | 11.351588 | 9.829065  |
| C                   | 20.610861 | 15.942137 | 10.213331 | C | 14.674264 | 6.289086  | 9.332001  |
| C                   | 19.224821 | 15.983724 | 10.474531 | C | 12.532435 | 5.218769  | 8.846448  |
| C                   | 21.402304 | 17.183775 | 10.189747 | C | 13.899416 | 5.183075  | 8.881642  |
| C                   | 22.741499 | 17.144924 | 9.582567  | C | 7.652306  | 16.216837 | 9.732185  |
| C                   | 23.386271 | 15.931314 | 9.460258  | C | 9.659321  | 5.228125  | 8.621968  |
| C                   | 22.706436 | 14.698493 | 9.769088  | C | 17.208462 | 17.288214 | 12.623487 |
| C                   | 23.393909 | 13.483301 | 9.655910  | C | 14.558371 | 13.340658 | 14.851502 |
| C                   | 22.701828 | 12.261160 | 9.708449  | C | 14.782799 | 14.727821 | 15.056515 |
| C                   | 16.992136 | 12.249330 | 10.600863 | C | 16.009785 | 15.073136 | 15.589233 |
| C                   | 16.326651 | 13.505193 | 11.080690 | C | 17.622375 | 16.664898 | 16.356846 |
| C                   | 17.065277 | 14.789122 | 10.758700 | C | 13.113043 | 11.609580 | 14.058299 |
| C                   | 16.355715 | 15.980453 | 10.796599 | O | 26.685083 | 12.992644 | 11.158586 |
| C                   | 17.108101 | 17.278076 | 11.024061 | O | 24.804667 | 14.041496 | 11.879192 |
| C                   | 18.547394 | 17.248394 | 10.556722 | O | 16.477348 | 13.492764 | 12.563809 |
| C                   | 20.665236 | 18.491772 | 10.229750 | O | 21.334805 | 17.978415 | 11.423749 |
| C                   | 19.195494 | 18.445364 | 10.322418 | O | 21.209555 | 22.005610 | 9.177076  |
| C                   | 24.751953 | 15.889555 | 8.949701  | O | 18.578773 | 5.649541  | 7.797368  |
| C                   | 25.450050 | 14.731337 | 8.938085  | O | 19.915678 | 5.759266  | 9.622332  |
| C                   | 21.324919 | 19.680901 | 9.634053  | O | 14.338118 | 7.747401  | 11.291105 |
| C                   | 23.375189 | 18.380423 | 9.162556  | O | 21.218027 | 11.438329 | 11.457670 |
| C                   | 22.625341 | 19.606426 | 9.206802  | O | 14.227839 | 19.586857 | 10.217651 |
| C                   | 18.485437 | 19.688456 | 10.204190 | O | 26.552452 | 17.131239 | 7.955296  |
| C                   | 17.089455 | 19.676434 | 10.295156 | O | 10.234617 | 11.071005 | 12.108382 |
| C                   | 16.361979 | 18.515131 | 10.567205 | O | 6.560140  | 16.205364 | 9.180236  |
| C                   | 14.926579 | 16.003490 | 10.791494 | O | 8.168953  | 17.373053 | 10.250167 |
| C                   | 14.189336 | 14.812935 | 10.844871 | O | 9.769269  | 4.722034  | 7.516334  |
| C                   | 14.840325 | 13.563874 | 10.805360 | O | 8.849264  | 4.716452  | 9.590709  |
| C                   | 16.239172 | 11.090981 | 10.441178 | O | 18.225092 | 17.004370 | 13.226839 |
| C                   | 16.892334 | 9.835068  | 10.202662 | O | 16.026251 | 17.570353 | 13.197175 |
| C                   | 18.376093 | 9.732984  | 10.435205 | O | 6.275730  | 8.950521  | 9.346095  |

|                    |           |           |           |   |           |           |           |
|--------------------|-----------|-----------|-----------|---|-----------|-----------|-----------|
| C                  | 21.175562 | 9.807750  | 9.573222  | O | 25.067616 | 9.923821  | 8.180750  |
| C                  | 22.509771 | 9.872375  | 9.180750  | O | 18.417999 | 9.372004  | 11.878205 |
| C                  | 23.274136 | 11.055632 | 9.260347  | O | 12.458160 | 15.055443 | 12.501117 |
| C                  | 19.027481 | 8.587886  | 9.678572  | O | 15.378000 | 12.429014 | 15.166245 |
| C                  | 20.370567 | 8.682102  | 9.324103  | O | 16.910051 | 14.195384 | 15.963926 |
| C                  | 24.640339 | 11.100999 | 8.740719  | O | 16.335295 | 16.377108 | 15.738469 |
| C                  | 25.392014 | 12.219566 | 8.803569  | O | 13.378204 | 13.021624 | 14.258606 |
| C                  | 25.416710 | 17.151066 | 8.468584  | H | 26.484772 | 14.735706 | 8.583888  |
| C                  | 24.660784 | 18.367828 | 8.645350  | H | 23.110439 | 20.509369 | 8.831750  |
| C                  | 20.542046 | 20.881790 | 9.573487  | H | 16.578880 | 20.614237 | 10.048798 |
| C                  | 19.196823 | 20.878996 | 9.871889  | H | 22.968340 | 8.990601  | 8.730687  |
| C                  | 14.965537 | 18.469162 | 10.473217 | H | 18.630239 | 21.812382 | 9.791116  |
| C                  | 14.222309 | 17.267969 | 10.591906 | H | 25.137665 | 19.295597 | 8.322027  |
| C                  | 14.105191 | 12.385836 | 10.622436 | H | 26.424921 | 12.227966 | 8.450130  |
| C                  | 14.779650 | 11.131680 | 10.453133 | H | 20.849569 | 7.836773  | 8.826311  |
| C                  | 24.896219 | 13.455112 | 9.503963  | H | 25.320831 | 14.045479 | 12.714643 |
| C                  | 25.579868 | 13.445678 | 10.943948 | H | 16.310005 | 12.578495 | 12.874199 |
| C                  | 18.246511 | 7.440284  | 9.395645  | H | 20.589243 | 22.756727 | 9.137209  |
| C                  | 16.196363 | 8.673274  | 9.981139  | H | 16.543987 | 5.414598  | 8.875902  |
| C                  | 14.038965 | 9.967773  | 10.275077 | H | 12.363605 | 18.207850 | 10.091621 |
| C                  | 12.653675 | 12.417356 | 10.561840 | H | 20.269854 | 4.962788  | 9.169437  |
| C                  | 12.691682 | 14.874666 | 11.055737 | H | 6.717075  | 13.844944 | 9.620889  |
| C                  | 12.850392 | 17.273149 | 10.372678 | H | 14.807436 | 20.369965 | 10.215341 |
| C                  | 16.848043 | 7.442883  | 9.579228  | H | 6.619362  | 11.380121 | 9.630781  |
| C                  | 14.738379 | 8.675145  | 10.220790 | H | 14.428295 | 4.291243  | 8.536496  |
| C                  | 12.601077 | 9.982574  | 10.225853 | H | 11.988273 | 4.347547  | 8.482388  |
| C                  | 11.932995 | 11.188381 | 10.407385 | H | 10.285402 | 10.113729 | 12.305159 |
| C                  | 11.965379 | 13.629620 | 10.644923 | H | 7.493008  | 18.059774 | 10.063118 |
| C                  | 12.068118 | 16.111923 | 10.468205 | H | 8.398540  | 3.938604  | 9.194108  |
| C                  | 10.722520 | 16.128288 | 10.151982 | H | 16.095549 | 17.318487 | 14.158063 |
| C                  | 13.946563 | 7.439998  | 9.910038  | H | 10.284492 | 17.078148 | 9.851349  |
| C                  | 16.048618 | 6.305182  | 9.262913  | H | 7.708416  | 6.834754  | 8.915151  |
| C                  | 18.898022 | 6.218011  | 8.831861  | H | 25.996655 | 10.022079 | 7.901714  |
| C                  | 10.544369 | 13.696020 | 10.406915 | H | 19.338470 | 9.503864  | 12.185368 |
| C                  | 10.443757 | 11.196396 | 10.627908 | H | 12.774643 | 14.251135 | 12.976885 |
| C                  | 11.850065 | 8.765944  | 9.912848  | H | 14.064488 | 15.475865 | 14.735067 |
| C                  | 12.496328 | 7.567539  | 9.654254  | H | 16.454540 | 13.266685 | 15.714398 |
| C                  | 11.782681 | 6.400010  | 9.189105  | H | 17.663771 | 16.212559 | 17.355501 |
| C                  | 10.415481 | 8.837953  | 9.764912  | H | 18.435799 | 16.293486 | 15.722996 |
| C                  | 9.731818  | 10.024281 | 10.001322 | H | 17.660908 | 17.757208 | 16.422531 |
| C                  | 9.801586  | 12.519816 | 10.310193 | H | 13.888177 | 11.158182 | 13.423863 |
| C                  | 9.899087  | 14.974217 | 10.193823 | H | 13.090501 | 11.091566 | 15.025885 |
| C                  | 8.491786  | 14.998316 | 9.936734  | H | 12.136974 | 11.570176 | 13.561525 |
| GO-AA-keto (below) |           |           |           |   |           |           |           |
| C                  | 18.996964 | 11.109699 | 10.353297 | C | 8.389862  | 15.042497 | 9.962753  |
| C                  | 18.347008 | 12.308782 | 10.551479 | C | 7.677847  | 13.848015 | 9.948274  |
| C                  | 19.095709 | 13.575672 | 10.542528 | C | 8.314389  | 12.610995 | 10.157900 |
| C                  | 20.487862 | 13.574728 | 10.333457 | C | 10.278347 | 6.484588  | 9.379549  |
| C                  | 21.240900 | 12.312420 | 10.305706 | C | 9.550387  | 7.691076  | 9.653543  |
| C                  | 20.459934 | 11.034835 | 10.270477 | C | 8.217878  | 10.162872 | 10.060711 |
| C                  | 18.407383 | 14.828146 | 10.633751 | C | 8.166986  | 7.738338  | 9.561011  |
| C                  | 21.220982 | 14.774205 | 10.144433 | C | 7.408109  | 8.943213  | 9.791798  |
| C                  | 20.546616 | 16.001413 | 10.264970 | C | 7.588712  | 11.394639 | 10.061587 |

|   |           |           |           |   |           |           |           |
|---|-----------|-----------|-----------|---|-----------|-----------|-----------|
| C | 19.151112 | 16.051914 | 10.482879 | C | 14.563730 | 6.356507  | 9.466010  |
| C | 21.340820 | 17.240814 | 10.249561 | C | 12.413399 | 5.267058  | 9.071120  |
| C | 22.710810 | 17.193817 | 9.717100  | C | 13.780914 | 5.241691  | 9.052109  |
| C | 23.349520 | 15.975314 | 9.609901  | C | 7.551887  | 16.256783 | 9.734703  |
| C | 22.647133 | 14.745018 | 9.877583  | C | 9.532177  | 5.248570  | 8.982297  |
| C | 23.322758 | 13.523806 | 9.750164  | C | 16.993828 | 17.638597 | 12.390404 |
| C | 22.614737 | 12.310645 | 9.768592  | C | 14.102299 | 13.094238 | 6.649992  |
| C | 16.905247 | 12.324145 | 10.701435 | C | 15.571836 | 13.379121 | 6.456109  |
| C | 16.234848 | 13.598867 | 11.137049 | C | 16.238388 | 14.111804 | 7.626723  |
| C | 16.984245 | 14.868919 | 10.777488 | C | 17.325346 | 15.113648 | 7.261603  |
| C | 16.273016 | 16.056820 | 10.691199 | C | 18.613539 | 14.561982 | 6.720776  |
| C | 17.001902 | 17.377937 | 10.815107 | O | 26.626869 | 12.964237 | 11.232590 |
| C | 18.471901 | 17.315594 | 10.457574 | O | 24.697298 | 13.863598 | 12.025476 |
| C | 20.599895 | 18.553291 | 10.212580 | O | 16.337042 | 13.647149 | 12.623993 |
| C | 19.130333 | 18.500969 | 10.194698 | O | 21.192383 | 18.064341 | 11.452518 |
| C | 24.735298 | 15.928177 | 9.155275  | O | 21.220112 | 22.049196 | 9.148195  |
| C | 25.413599 | 14.759656 | 9.116979  | O | 18.374882 | 5.802794  | 7.722772  |
| C | 21.300230 | 19.732157 | 9.644994  | O | 19.809397 | 5.841940  | 9.473846  |
| C | 23.375351 | 18.426958 | 9.337110  | O | 14.273521 | 7.818779  | 11.434136 |
| C | 22.629223 | 19.655203 | 9.323236  | O | 21.134377 | 11.471651 | 11.507328 |
| C | 18.424746 | 19.725145 | 9.934488  | O | 14.203785 | 19.506954 | 9.421627  |
| C | 17.029112 | 19.692799 | 9.865595  | O | 26.616159 | 17.171028 | 8.325012  |
| C | 16.290512 | 18.542030 | 10.149804 | O | 10.177909 | 11.240466 | 12.262590 |
| C | 14.847778 | 16.074358 | 10.612293 | O | 6.457296  | 16.237007 | 9.188737  |
| C | 14.107825 | 14.892820 | 10.761727 | O | 8.077394  | 17.419270 | 10.229949 |
| C | 14.754750 | 13.644438 | 10.828817 | O | 9.586360  | 4.723775  | 7.881482  |
| C | 16.150673 | 11.163048 | 10.548485 | O | 8.784530  | 4.747490  | 10.004314 |
| C | 16.797985 | 9.906900  | 10.296063 | O | 17.970425 | 17.569880 | 13.104168 |
| C | 18.285761 | 9.798500  | 10.491438 | O | 15.744947 | 17.922607 | 12.846294 |
| C | 21.066359 | 9.879043  | 9.587143  | O | 6.158314  | 8.966741  | 9.760552  |
| C | 22.397873 | 9.938358  | 9.186105  | O | 24.947618 | 9.987003  | 8.169926  |
| C | 23.174078 | 11.110352 | 9.290461  | O | 18.368265 | 9.405418  | 11.922288 |
| C | 18.915712 | 8.669288  | 9.690967  | O | 12.417284 | 15.133571 | 12.435213 |
| C | 20.252625 | 8.766676  | 9.315869  | O | 16.187778 | 13.028175 | 5.458148  |
| C | 24.538685 | 11.152116 | 8.766907  | O | 17.130566 | 16.314907 | 7.428413  |
| C | 25.304823 | 12.258221 | 8.863325  | H | 26.460449 | 14.762472 | 8.800796  |
| C | 25.446377 | 17.192410 | 8.754217  | H | 23.141371 | 20.553183 | 8.973751  |
| C | 24.689440 | 18.411612 | 8.899068  | H | 16.534441 | 20.610489 | 9.528358  |
| C | 20.521362 | 20.927448 | 9.489287  | H | 22.843620 | 9.062705  | 8.712240  |
| C | 19.152790 | 20.915226 | 9.639743  | H | 18.587734 | 21.837051 | 9.468830  |
| C | 14.913473 | 18.461720 | 9.931032  | H | 25.189072 | 19.339354 | 8.612653  |
| C | 14.153131 | 17.301277 | 10.227233 | H | 26.338097 | 12.265943 | 8.511248  |
| C | 14.016729 | 12.460563 | 10.704173 | H | 20.720863 | 7.932330  | 8.790991  |
| C | 14.690485 | 11.201905 | 10.566759 | H | 25.208317 | 13.822112 | 12.863307 |
| C | 24.824963 | 13.472724 | 9.611927  | H | 15.794772 | 12.906645 | 12.965864 |
| C | 25.502029 | 13.381623 | 11.051129 | H | 20.603662 | 22.794870 | 9.027435  |
| C | 18.127592 | 7.530226  | 9.399668  | H | 16.420702 | 5.495912  | 8.939759  |
| C | 16.097132 | 8.746099  | 10.077525 | H | 12.297330 | 18.189100 | 9.635137  |
| C | 13.947001 | 10.036317 | 10.409532 | H | 20.137331 | 5.064716  | 8.970438  |
| C | 12.565970 | 12.494938 | 10.638391 | H | 6.603362  | 13.880719 | 9.761010  |
| C | 12.614064 | 14.972973 | 10.969069 | H | 14.810820 | 20.229885 | 9.179800  |
| C | 12.779503 | 17.293205 | 10.028162 | H | 6.507474  | 11.414378 | 9.898777  |
| C | 16.737129 | 7.523732  | 9.638187  | H | 14.302732 | 4.351146  | 8.693129  |
| C | 14.645665 | 8.743552  | 10.351988 | H | 11.861070 | 4.388846  | 8.737473  |
| C | 12.508043 | 10.050568 | 10.376459 | H | 10.551300 | 10.388253 | 12.566418 |

|   |           |           |           |   |           |           |           |
|---|-----------|-----------|-----------|---|-----------|-----------|-----------|
| C | 11.842855 | 11.261552 | 10.533974 | H | 7.405772  | 18.107691 | 10.033669 |
| C | 11.878219 | 13.707367 | 10.657158 | H | 8.321078  | 3.956812  | 9.649867  |
| C | 11.985953 | 16.163046 | 10.293655 | H | 15.826357 | 18.013191 | 13.819963 |
| C | 10.628994 | 16.171213 | 10.022907 | H | 10.188008 | 17.099091 | 9.662307  |
| C | 13.850220 | 7.506380  | 10.063238 | H | 7.585705  | 6.847040  | 9.324365  |
| C | 15.933965 | 6.382880  | 9.345243  | H | 25.877180 | 10.080125 | 7.890738  |
| C | 18.750881 | 6.330518  | 8.759383  | H | 19.288166 | 9.564606  | 12.218182 |
| C | 10.455101 | 13.763480 | 10.436104 | H | 13.038061 | 15.832956 | 12.726642 |
| C | 10.358583 | 11.279428 | 10.786198 | H | 13.719854 | 12.469164 | 5.835284  |
| C | 11.750899 | 8.826975  | 10.104935 | H | 13.934188 | 12.604443 | 7.623327  |
| C | 12.393220 | 7.626865  | 9.847687  | H | 13.547359 | 14.046228 | 6.685407  |
| C | 11.669981 | 6.447536  | 9.429117  | H | 18.392023 | 13.923134 | 5.850262  |
| C | 10.311942 | 8.891028  | 10.001953 | H | 19.300945 | 15.373283 | 6.455524  |
| C | 9.633321  | 10.080130 | 10.227222 | H | 19.078279 | 13.909075 | 7.478577  |
| C | 9.708382  | 12.586075 | 10.416452 | H | 16.679058 | 13.307244 | 8.244125  |
| C | 9.803650  | 15.028234 | 10.172376 | H | 15.478265 | 14.621258 | 8.232363  |

GO-AA-enol (below)

|   |           |           |           |   |           |           |           |
|---|-----------|-----------|-----------|---|-----------|-----------|-----------|
| C | 18.967705 | 11.229963 | 10.240716 | C | 8.322764  | 15.114351 | 10.043097 |
| C | 18.311144 | 12.424303 | 10.441190 | C | 7.617445  | 13.916035 | 10.014496 |
| C | 19.054075 | 13.693479 | 10.442636 | C | 8.267450  | 12.678436 | 10.174908 |
| C | 20.450144 | 13.698697 | 10.263944 | C | 10.260386 | 6.592681  | 9.175797  |
| C | 21.209072 | 12.439068 | 10.252061 | C | 9.528385  | 7.783549  | 9.506100  |
| C | 20.432266 | 11.158350 | 10.184612 | C | 8.186252  | 10.233182 | 10.015892 |
| C | 18.358286 | 14.941454 | 10.506000 | C | 8.143150  | 7.824814  | 9.441814  |
| C | 21.178436 | 14.901470 | 10.073966 | C | 7.380852  | 9.014737  | 9.730580  |
| C | 20.493475 | 16.125431 | 10.162891 | C | 7.548091  | 11.459404 | 10.063123 |
| C | 19.095299 | 16.167837 | 10.357614 | C | 14.550341 | 6.502416  | 9.182760  |
| C | 21.277681 | 17.371254 | 10.136014 | C | 12.402527 | 5.412517  | 8.772161  |
| C | 22.655602 | 17.324997 | 9.624158  | C | 13.769650 | 5.402022  | 8.728374  |
| C | 23.308224 | 16.111181 | 9.560122  | C | 7.472775  | 16.331196 | 9.885710  |
| C | 22.609589 | 14.880347 | 9.837117  | C | 9.519274  | 5.358312  | 8.764828  |
| C | 23.295822 | 13.662945 | 9.740628  | C | 16.945503 | 17.711103 | 12.265974 |
| C | 22.594604 | 12.445462 | 9.745416  | C | 14.679296 | 10.808626 | 6.862009  |
| C | 16.869654 | 12.431644 | 10.578424 | C | 15.751746 | 11.842383 | 7.065872  |
| C | 16.193371 | 13.704956 | 10.996201 | C | 17.127340 | 11.503516 | 6.885769  |
| C | 16.933718 | 14.974199 | 10.625967 | C | 18.093515 | 12.492768 | 7.002428  |
| C | 16.215681 | 16.156973 | 10.546956 | C | 19.551626 | 12.270646 | 6.776332  |
| C | 16.939234 | 17.481422 | 10.685980 | O | 26.470827 | 13.003665 | 11.375320 |
| C | 18.407341 | 17.428106 | 10.317619 | O | 24.657082 | 14.212480 | 12.013243 |
| C | 20.528259 | 18.676659 | 10.066248 | O | 16.304451 | 13.769918 | 12.487152 |
| C | 19.058033 | 18.615562 | 10.045276 | O | 21.113316 | 18.217367 | 11.321798 |
| C | 24.704729 | 16.067375 | 9.139172  | O | 21.128811 | 22.155560 | 8.936668  |
| C | 25.394258 | 14.904674 | 9.145172  | O | 18.397959 | 6.094959  | 7.368697  |
| C | 21.223509 | 19.849527 | 9.480421  | O | 19.742092 | 5.958891  | 9.187662  |
| C | 23.314316 | 18.555799 | 9.226398  | O | 14.265720 | 7.870101  | 11.221478 |
| C | 22.556374 | 19.776026 | 9.172107  | O | 21.079664 | 11.583202 | 11.439966 |
| C | 18.344589 | 19.834743 | 9.779610  | O | 14.098211 | 19.629284 | 9.414292  |
| C | 16.947746 | 19.798857 | 9.733374  | O | 26.592981 | 17.312321 | 8.327242  |
| C | 16.213270 | 18.649479 | 10.040730 | O | 10.176022 | 11.269463 | 12.205719 |
| C | 14.788238 | 16.167915 | 10.497394 | O | 6.362051  | 16.327423 | 9.373134  |
| C | 14.058784 | 14.983796 | 10.658966 | O | 8.007496  | 17.475721 | 10.412822 |
| C | 14.712406 | 13.739386 | 10.709743 | O | 9.580232  | 4.836344  | 7.662401  |
| C | 16.120144 | 11.269695 | 10.426491 | O | 8.767587  | 4.848407  | 9.780238  |

|                                     |           |           |            |   |           |           |           |
|-------------------------------------|-----------|-----------|------------|---|-----------|-----------|-----------|
| C                                   | 16.771873 | 10.022009 | 10.152278  | O | 17.926161 | 17.615911 | 12.971438 |
| C                                   | 18.259966 | 9.914918  | 10.341749  | O | 15.703032 | 17.996719 | 12.738379 |
| C                                   | 21.054396 | 10.015583 | 9.493200   | O | 6.130457  | 9.026766  | 9.733891  |
| C                                   | 22.396557 | 10.080854 | 9.128864   | O | 24.976097 | 10.140881 | 8.190821  |
| C                                   | 23.169300 | 11.250863 | 9.271132   | O | 18.344557 | 9.474743  | 11.759893 |
| C                                   | 18.896782 | 8.813864  | 9.508530   | O | 12.422508 | 15.190413 | 12.388439 |
| C                                   | 20.242752 | 8.915458  | 9.168270   | O | 15.407349 | 13.033312 | 7.371040  |
| C                                   | 24.548046 | 11.300718 | 8.786091   | O | 17.749025 | 13.731713 | 7.308979  |
| C                                   | 25.309114 | 12.406721 | 8.914531   | H | 26.447618 | 14.910427 | 8.851002  |
| C                                   | 25.411421 | 17.329554 | 8.724030   | H | 23.064741 | 20.670881 | 8.809250  |
| C                                   | 24.637356 | 18.543056 | 8.816163   | H | 16.447876 | 20.709675 | 9.384783  |
| C                                   | 20.436607 | 21.036171 | 9.301159   | H | 22.854649 | 9.213316  | 8.651693  |
| C                                   | 19.068436 | 21.021496 | 9.458592   | H | 18.499916 | 21.939579 | 9.277985  |
| C                                   | 14.827912 | 18.571184 | 9.869044   | H | 25.133904 | 19.468559 | 8.517622  |
| C                                   | 14.079178 | 17.400791 | 10.159407  | H | 26.351301 | 12.417869 | 8.589554  |
| C                                   | 13.980187 | 12.552481 | 10.602667  | H | 20.720192 | 8.093704  | 8.630868  |
| C                                   | 14.660028 | 11.299421 | 10.455149  | H | 25.131325 | 14.174143 | 12.872057 |
| C                                   | 24.802361 | 13.620342 | 9.644937   | H | 15.739354 | 13.050411 | 12.837090 |
| C                                   | 25.419485 | 13.549597 | 11.113165  | H | 20.507891 | 22.895424 | 8.804728  |
| C                                   | 18.108114 | 7.692829  | 9.160448   | H | 16.407757 | 5.679564  | 8.596715  |
| C                                   | 16.074921 | 8.866951  | 9.898005   | H | 12.198909 | 18.293934 | 9.656496  |
| C                                   | 13.921757 | 10.132298 | 10.287863  | H | 20.079506 | 5.213098  | 8.644357  |
| C                                   | 12.529307 | 12.579122 | 10.561625  | H | 6.537978  | 13.946139 | 9.858032  |
| C                                   | 12.573456 | 15.052588 | 10.911964  | H | 14.685474 | 20.390320 | 9.254800  |
| C                                   | 12.698973 | 17.391684 | 10.010781  | H | 6.463503  | 11.475443 | 9.924316  |
| C                                   | 16.718477 | 7.670959  | 9.398679   | H | 14.292901 | 4.533329  | 8.321077  |
| C                                   | 14.625557 | 8.845868  | 10.180926  | H | 11.853197 | 4.543933  | 8.410498  |
| C                                   | 12.482185 | 10.140044 | 10.262234  | H | 10.569570 | 10.417225 | 12.482746 |
| C                                   | 11.811992 | 11.343619 | 10.45166 0 | H | 7.326511  | 18.167034 | 10.265062 |
| C                                   | 11.835327 | 13.786905 | 10.607756  | H | 8.309307  | 4.058680  | 9.417427  |
| C                                   | 11.919713 | 16.251875 | 10.280521  | H | 15.794157 | 18.066212 | 13.712860 |
| C                                   | 10.554786 | 16.256481 | 10.055775  | H | 10.095570 | 17.187576 | 9.727563  |
| C                                   | 13.835072 | 7.617944  | 9.840693   | H | 7.562420  | 6.938318  | 9.187666  |
| C                                   | 15.919422 | 6.543009  | 9.049948   | H | 25.915440 | 10.235135 | 7.947219  |
| C                                   | 18.733870 | 6.528343  | 8.461597   | H | 19.251909 | 9.668329  | 12.073175 |
| C                                   | 10.407714 | 13.838195 | 10.425127  | H | 13.093513 | 15.842923 | 12.677269 |
| C                                   | 10.332295 | 11.346069 | 10.726871  | H | 17.417479 | 10.482704 | 6.643903  |
| C                                   | 11.728661 | 8.921651  | 9.958447   | H | 16.677046 | 13.676589 | 7.397136  |
| C                                   | 12.375110 | 7.737040  | 9.645350   | H | 19.797592 | 11.202830 | 6.735260  |
| C                                   | 11.653821 | 6.568899  | 9.193011   | H | 19.852407 | 12.743160 | 5.827718  |
| C                                   | 10.287546 | 8.978398  | 9.878883   | H | 20.132723 | 12.756168 | 7.573520  |
| C                                   | 9.605384  | 10.155642 | 10.151444  | H | 13.786978 | 11.071001 | 7.443595  |
| C                                   | 9.666960  | 12.656707 | 10.400296  | H | 14.397986 | 10.790636 | 5.796332  |
| C                                   | 9.742011  | 15.103937 | 10.208006  | H | 15.027723 | 9.801695  | 7.130508  |
| GO-CF <sub>3</sub> _DK-keto (below) |           |           |            |   |           |           |           |
| C                                   | 18.943634 | 11.176723 | 10.262226  | C | 8.324467  | 15.102736 | 9.855055  |
| C                                   | 18.294043 | 12.376174 | 10.448789  | C | 7.614089  | 13.906907 | 9.844096  |
| C                                   | 19.042673 | 13.642286 | 10.434619  | C | 8.255646  | 12.670217 | 10.042964 |
| C                                   | 20.437254 | 13.639568 | 10.247145  | C | 10.221740 | 6.535130  | 9.314870  |
| C                                   | 21.188650 | 12.376503 | 10.233290  | C | 9.494016  | 7.742196  | 9.589507  |
| C                                   | 20.406363 | 11.099821 | 10.187962  | C | 8.161257  | 10.219710 | 9.980244  |
| C                                   | 18.352417 | 14.895847 | 10.488422  | C | 8.109489  | 7.786057  | 9.518429  |
| C                                   | 21.172657 | 14.836862 | 10.052450  | C | 7.351738  | 8.992781  | 9.745465  |

|   |           |           |           |   |           |           |           |
|---|-----------|-----------|-----------|---|-----------|-----------|-----------|
| C | 20.496384 | 16.065506 | 10.143027 | C | 7.530767  | 11.450822 | 9.969609  |
| C | 19.096842 | 16.117990 | 10.333213 | C | 14.510480 | 6.432651  | 9.317272  |
| C | 21.289055 | 17.305296 | 10.119590 | C | 12.359350 | 5.330400  | 8.960432  |
| C | 22.669395 | 17.251678 | 9.615726  | C | 13.726627 | 5.315514  | 8.912122  |
| C | 23.310320 | 16.032114 | 9.539047  | C | 7.480593  | 16.321196 | 9.676951  |
| C | 22.602440 | 14.805534 | 9.809035  | C | 9.475739  | 5.288367  | 8.954540  |
| C | 23.279198 | 13.582716 | 9.702953  | C | 16.898760 | 17.821613 | 12.158079 |
| C | 22.569576 | 12.371243 | 9.715448  | C | 14.873445 | 10.612516 | 6.616828  |
| C | 16.850842 | 12.394114 | 10.572759 | C | 15.016821 | 12.015992 | 6.103025  |
| C | 16.173883 | 13.677163 | 10.967028 | C | 15.790311 | 13.011576 | 7.001720  |
| C | 16.926430 | 14.938945 | 10.591197 | C | 17.274403 | 12.742897 | 7.019062  |
| C | 16.215950 | 16.124849 | 10.474480 | C | 18.171556 | 13.958339 | 6.624558  |
| C | 16.939528 | 17.446018 | 10.602442 | O | 26.523226 | 12.978535 | 11.265831 |
| C | 18.414766 | 17.380157 | 10.268088 | O | 24.636793 | 14.021898 | 11.983266 |
| C | 20.545918 | 18.616985 | 10.041826 | O | 16.250837 | 13.763853 | 12.456213 |
| C | 19.076887 | 18.561172 | 9.992935  | O | 21.112078 | 18.151630 | 11.301525 |
| C | 24.704519 | 15.979794 | 9.112046  | O | 21.184250 | 22.093197 | 8.925846  |
| C | 25.382057 | 14.810453 | 9.095773  | O | 18.309153 | 5.948172  | 7.502450  |
| C | 21.257393 | 19.785763 | 9.467115  | O | 19.742538 | 5.919357  | 9.254793  |
| C | 23.340969 | 18.479227 | 9.229853  | O | 14.230412 | 7.876038  | 11.303178 |
| C | 22.593597 | 19.705811 | 9.177769  | O | 21.069090 | 11.533140 | 11.432278 |
| C | 18.374525 | 19.778242 | 9.687966  | O | 14.139032 | 19.575912 | 9.204401  |
| C | 16.980593 | 19.744711 | 9.598565  | O | 26.606354 | 17.211967 | 8.316208  |
| C | 16.233166 | 18.603947 | 9.907592  | O | 10.144035 | 11.333204 | 12.140430 |
| C | 14.791000 | 16.139046 | 10.381981 | O | 6.374614  | 16.317337 | 9.154757  |
| C | 14.052208 | 14.960939 | 10.547314 | O | 8.015901  | 17.466860 | 10.200731 |
| C | 14.699585 | 13.715103 | 10.638975 | O | 9.526433  | 4.731246  | 7.869357  |
| C | 16.096901 | 11.231826 | 10.425203 | O | 8.734605  | 4.814043  | 9.994186  |
| C | 16.743717 | 9.976814  | 10.175752 | O | 17.856499 | 18.181744 | 12.807342 |
| C | 18.229748 | 9.865211  | 10.372290 | O | 15.641529 | 17.726923 | 12.664204 |
| C | 21.016657 | 9.948441  | 9.501299  | O | 6.101835  | 9.011141  | 9.739273  |
| C | 22.354961 | 10.003025 | 9.122385  | O | 24.925676 | 10.037572 | 8.164634  |
| C | 23.134415 | 11.169700 | 9.246338  | O | 18.306030 | 9.444874  | 11.797257 |
| C | 18.860533 | 8.749187  | 9.554180  | O | 12.393308 | 15.210835 | 12.246428 |
| C | 20.202127 | 8.846026  | 9.198094  | O | 14.546190 | 12.408499 | 5.048388  |
| C | 24.508829 | 11.205979 | 8.749263  | O | 17.803164 | 11.677883 | 7.282627  |
| C | 25.276022 | 12.309793 | 8.858685  | H | 26.433838 | 14.809787 | 8.796255  |
| C | 25.425356 | 17.238655 | 8.713244  | H | 23.111717 | 20.598467 | 8.823286  |
| C | 24.664347 | 18.459000 | 8.821210  | H | 16.493385 | 20.651020 | 9.221541  |
| C | 20.479736 | 20.975351 | 9.267798  | H | 22.802998 | 9.128514  | 8.648630  |
| C | 19.107620 | 20.961731 | 9.380924  | H | 18.545341 | 21.878590 | 9.177315  |
| C | 14.852349 | 18.526756 | 9.704552  | H | 25.169416 | 19.383072 | 8.532547  |
| C | 14.092161 | 17.366610 | 10.005065 | H | 26.315989 | 12.313770 | 8.527084  |
| C | 13.961395 | 12.528646 | 10.542032 | H | 20.673088 | 8.019381  | 8.664151  |
| C | 14.636453 | 11.268770 | 10.434298 | H | 25.130466 | 13.988205 | 12.831563 |
| C | 24.783281 | 13.528490 | 9.590182  | H | 15.712665 | 13.024367 | 12.806769 |
| C | 25.428520 | 13.452787 | 11.045507 | H | 20.568899 | 22.834574 | 8.776407  |
| C | 18.070520 | 7.620456  | 9.233297  | H | 16.364180 | 5.587402  | 8.754576  |
| C | 16.042721 | 8.818702  | 9.944724  | H | 12.226552 | 18.257858 | 9.446995  |
| C | 13.892903 | 10.101328 | 10.287645 | H | 20.066114 | 5.157669  | 8.725447  |
| C | 12.511655 | 12.561730 | 10.478655 | H | 6.536071  | 13.939097 | 9.678018  |
| C | 12.563374 | 15.042556 | 10.776838 | H | 14.735239 | 20.326321 | 9.028768  |
| C | 12.714922 | 17.360630 | 9.829470  | H | 6.447496  | 11.467285 | 9.820976  |
| C | 16.681259 | 7.606629  | 9.479531  | H | 14.247226 | 4.429739  | 8.539763  |
| C | 14.593199 | 8.810201  | 10.226459 | H | 11.806824 | 4.448598  | 8.637221  |

|   |           |           |           |   |           |           |           |
|---|-----------|-----------|-----------|---|-----------|-----------|-----------|
| C | 12.454418 | 10.115007 | 10.253403 | H | 10.514114 | 10.482667 | 12.453135 |
| C | 11.789322 | 11.327670 | 10.397481 | H | 7.339495  | 18.160460 | 10.042597 |
| C | 11.823751 | 13.774255 | 10.486523 | H | 8.273238  | 4.011681  | 9.664322  |
| C | 11.924339 | 16.231125 | 10.109966 | H | 15.708765 | 17.980391 | 13.609630 |
| C | 10.562530 | 16.236824 | 9.865439  | H | 10.111764 | 17.162722 | 9.511217  |
| C | 13.799055 | 7.573905  | 9.932539  | H | 7.525994  | 6.890985  | 9.303077  |
| C | 15.878867 | 6.467676  | 9.176497  | H | 25.859873 | 10.127904 | 7.900679  |
| C | 18.688131 | 6.438496  | 8.556122  | H | 19.224243 | 9.600123  | 12.100159 |
| C | 10.398739 | 13.827815 | 10.284416 | H | 13.089294 | 15.835343 | 12.538568 |
| C | 10.308028 | 11.348303 | 10.661495 | H | 14.419037 | 9.970078  | 5.854661  |
| C | 11.697029 | 8.889168  | 9.996127  | H | 15.850500 | 10.220395 | 6.939206  |
| C | 12.339252 | 7.690327  | 9.734070  | H | 14.236882 | 10.630341 | 7.517606  |
| C | 11.614540 | 6.505857  | 9.332912  | H | 15.434185 | 12.891660 | 8.039888  |
| C | 10.256613 | 8.949123  | 9.911669  | H | 15.572063 | 14.030856 | 6.662678  |
| C | 9.578806  | 10.140032 | 10.129657 | F | 17.798920 | 15.082873 | 7.309096  |
| C | 9.652610  | 12.649499 | 10.282602 | F | 19.476639 | 13.732742 | 6.875792  |
| C | 9.742134  | 15.091125 | 10.032586 | F | 18.023857 | 14.219093 | 5.294004  |

GO-CF<sub>3</sub>\_DK-enol (below)

|   |           |           |           |   |           |           |           |
|---|-----------|-----------|-----------|---|-----------|-----------|-----------|
| C | 18.966658 | 11.158887 | 10.273727 | C | 8.347167  | 15.068928 | 9.919359  |
| C | 18.316404 | 12.357465 | 10.460569 | C | 7.637296  | 13.873261 | 9.925667  |
| C | 19.066654 | 13.623011 | 10.447489 | C | 8.280293  | 12.639340 | 10.135761 |
| C | 20.462437 | 13.620190 | 10.271450 | C | 10.247263 | 6.493040  | 9.468182  |
| C | 21.212734 | 12.355849 | 10.250731 | C | 9.520617  | 7.707346  | 9.712741  |
| C | 20.429077 | 11.082257 | 10.195028 | C | 8.188190  | 10.189532 | 10.067458 |
| C | 18.375999 | 14.875238 | 10.495225 | C | 8.137309  | 7.753061  | 9.622044  |
| C | 21.197706 | 14.817722 | 10.077554 | C | 7.379397  | 8.964645  | 9.817286  |
| C | 20.519590 | 16.046307 | 10.160189 | C | 7.556601  | 11.419665 | 10.059081 |
| C | 19.119820 | 16.097530 | 10.341529 | C | 14.535224 | 6.394757  | 9.453860  |
| C | 21.310221 | 17.287842 | 10.135480 | C | 12.384306 | 5.281525  | 9.136213  |
| C | 22.690815 | 17.233160 | 9.632236  | C | 13.751163 | 5.267921  | 9.078413  |
| C | 23.333057 | 16.013660 | 9.559918  | C | 7.503026  | 16.282055 | 9.711232  |
| C | 22.627100 | 14.786378 | 9.833067  | C | 9.499416  | 5.235051  | 9.152150  |
| C | 23.303064 | 13.562964 | 9.720820  | C | 16.931807 | 17.689705 | 12.187772 |
| C | 22.591480 | 12.352408 | 9.727497  | C | 14.141044 | 12.694197 | 7.207894  |
| C | 16.875025 | 12.372158 | 10.606625 | C | 15.551979 | 12.200413 | 7.127260  |
| C | 16.203506 | 13.657072 | 10.999168 | C | 16.652767 | 13.114984 | 7.043883  |
| C | 16.950874 | 14.914858 | 10.602224 | C | 17.910717 | 12.578626 | 6.858249  |
| C | 16.237452 | 16.099287 | 10.486151 | C | 19.139353 | 13.455857 | 6.627046  |
| C | 16.961445 | 17.423473 | 10.613561 | O | 26.594429 | 12.999846 | 11.235859 |
| C | 18.437155 | 17.359118 | 10.278313 | O | 24.647251 | 13.872145 | 12.015710 |
| C | 20.566656 | 18.597525 | 10.053242 | O | 16.307768 | 13.757499 | 12.486355 |
| C | 19.097227 | 18.541880 | 10.006878 | O | 21.133192 | 18.137978 | 11.316027 |
| C | 24.727018 | 15.961772 | 9.131207  | O | 21.199795 | 22.073170 | 8.933614  |
| C | 25.404682 | 14.792667 | 9.112002  | O | 18.275486 | 5.928533  | 7.544318  |
| C | 21.275627 | 19.765965 | 9.475556  | O | 19.764383 | 5.901192  | 9.250299  |
| C | 23.360325 | 18.459925 | 9.240883  | O | 14.267646 | 7.864817  | 11.421293 |
| C | 22.611311 | 19.685888 | 9.184298  | O | 21.094439 | 11.502996 | 11.443563 |
| C | 18.392227 | 19.759991 | 9.713619  | O | 14.157945 | 19.545172 | 9.218676  |
| C | 16.997124 | 19.725624 | 9.629370  | O | 26.626728 | 17.194599 | 8.329467  |
| C | 16.253181 | 18.579727 | 9.928893  | O | 10.162574 | 11.304695 | 12.240015 |
| C | 14.812433 | 16.113668 | 10.412016 | O | 6.401414  | 16.264612 | 9.179822  |
| C | 14.075428 | 14.936265 | 10.599028 | O | 8.032057  | 17.440323 | 10.213526 |
| C | 14.723787 | 13.691861 | 10.700755 | O | 9.552986  | 4.630670  | 8.092465  |



|   |           |           |           |   |           |           |           |
|---|-----------|-----------|-----------|---|-----------|-----------|-----------|
| C | 16.122305 | 11.207722 | 10.487743 | O | 8.751367  | 4.806740  | 10.207285 |
| C | 16.768696 | 9.951784  | 10.241898 | O | 17.898626 | 17.622129 | 12.914577 |
| C | 18.259190 | 9.845980  | 10.408312 | O | 15.676954 | 17.974859 | 12.627381 |
| C | 21.032145 | 9.933239  | 9.498412  | O | 6.130119  | 8.989432  | 9.772204  |
| C | 22.367630 | 9.989870  | 9.110706  | O | 24.936682 | 10.025743 | 8.149479  |
| C | 23.150053 | 11.153927 | 9.243313  | O | 18.371025 | 9.437740  | 11.833683 |
| C | 18.878996 | 8.728821  | 9.582438  | O | 12.421028 | 15.213246 | 12.301727 |
| C | 20.214270 | 8.830442  | 9.203136  | O | 15.768383 | 10.942255 | 7.089675  |
| C | 24.522732 | 11.191192 | 8.741870  | O | 18.137142 | 11.292718 | 6.803271  |
| C | 25.292610 | 12.292897 | 8.855199  | H | 26.456558 | 14.792934 | 8.812966  |
| C | 25.446487 | 17.220942 | 8.728820  | H | 23.129126 | 20.577785 | 8.827425  |
| C | 24.683861 | 18.440596 | 8.832945  | H | 16.507412 | 20.635538 | 9.264199  |
| C | 20.496553 | 20.955956 | 9.281274  | H | 22.811953 | 9.119331  | 8.626348  |
| C | 19.125437 | 20.944593 | 9.406615  | H | 18.563393 | 21.863081 | 9.209498  |
| C | 14.873258 | 18.498281 | 9.720987  | H | 25.187637 | 19.364285 | 8.541029  |
| C | 14.113413 | 17.338284 | 10.026314 | H | 26.332184 | 12.296629 | 8.522259  |
| C | 13.986325 | 12.503191 | 10.631132 | H | 20.678856 | 8.005047  | 8.661869  |
| C | 14.661999 | 11.243917 | 10.519738 | H | 25.148851 | 13.824308 | 12.858955 |
| C | 24.806419 | 13.507699 | 9.599464  | H | 15.744186 | 13.045094 | 12.852736 |
| C | 25.467997 | 13.409145 | 11.045399 | H | 20.584412 | 22.815752 | 8.790432  |
| C | 18.085451 | 7.596907  | 9.283066  | H | 16.382795 | 5.546286  | 8.877781  |
| C | 16.067257 | 8.791479  | 10.030575 | H | 12.244548 | 18.221024 | 9.464748  |
| C | 13.919490 | 10.075743 | 10.383325 | H | 20.074257 | 5.142958  | 8.708096  |
| C | 12.536420 | 12.535753 | 10.574145 | H | 6.559567  | 13.902426 | 9.757901  |
| C | 12.587416 | 15.021921 | 10.835075 | H | 14.753262 | 20.296711 | 9.044508  |
| C | 12.735802 | 17.328083 | 9.853924  | H | 6.474030  | 11.435089 | 9.904667  |
| C | 16.702477 | 7.578954  | 9.563726  | H | 14.270532 | 4.376417  | 8.718107  |
| C | 14.620718 | 8.784780  | 10.326699 | H | 11.830930 | 4.393195  | 8.833549  |
| C | 12.480684 | 10.087631 | 10.357784 | H | 10.541231 | 10.458283 | 12.553526 |
| C | 11.814238 | 11.300288 | 10.499186 | H | 7.355178  | 18.128645 | 10.035425 |
| C | 11.847775 | 13.748881 | 10.566459 | H | 8.289884  | 3.992370  | 9.908429  |
| C | 11.946959 | 16.200499 | 10.150556 | H | 15.747292 | 18.069584 | 13.601473 |
| C | 10.584196 | 16.202694 | 9.910850  | H | 10.132115 | 17.123650 | 9.545280  |
| C | 13.827024 | 7.544670  | 10.057119 | H | 7.555193  | 6.856694  | 9.408225  |
| C | 15.900979 | 6.432003  | 9.292282  | H | 25.869267 | 10.117857 | 7.880375  |
| C | 18.686197 | 6.418024  | 8.586370  | H | 19.295204 | 9.600193  | 12.114395 |
| C | 10.422825 | 13.799593 | 10.365973 | H | 13.053012 | 15.913460 | 12.566022 |
| C | 10.332371 | 11.320590 | 10.761068 | H | 13.497643 | 11.932126 | 7.663879  |
| C | 11.723581 | 8.858353  | 10.112332 | H | 16.501516 | 14.189737 | 7.097334  |
| C | 12.365708 | 7.656335  | 9.864970  | H | 14.070904 | 13.636094 | 7.768457  |
| C | 11.640361 | 6.464159  | 9.486416  | H | 13.775732 | 12.883379 | 6.184689  |
| C | 10.283031 | 8.917622  | 10.023546 | H | 17.102924 | 10.880057 | 6.931993  |
| C | 9.604842  | 10.110569 | 10.228323 | F | 18.966990 | 14.708307 | 7.136988  |
| C | 9.676895  | 12.620481 | 10.376736 | F | 20.252745 | 12.924119 | 7.192921  |
| C | 9.765034  | 15.059685 | 10.096888 | F | 19.383007 | 13.589525 | 5.291326  |

GO-MAA-keto (below)

|   |           |           |           |   |           |           |          |
|---|-----------|-----------|-----------|---|-----------|-----------|----------|
| C | 18.952488 | 11.139504 | 10.190342 | C | 7.628166  | 13.852086 | 9.746121 |
| C | 18.299301 | 12.339825 | 10.370480 | C | 8.267865  | 12.617762 | 9.961530 |
| C | 19.046249 | 13.607562 | 10.360875 | C | 10.243303 | 6.477604  | 9.272208 |
| C | 20.441389 | 13.605649 | 10.172085 | C | 9.514108  | 7.690765  | 9.514579 |
| C | 21.196560 | 12.344085 | 10.174365 | C | 8.177458  | 10.168982 | 9.875663 |
| C | 20.416817 | 11.064329 | 10.135717 | C | 8.131675  | 7.736612  | 9.409956 |
| C | 18.353540 | 14.858896 | 10.419237 | C | 7.371549  | 8.946048  | 9.609674 |

|   |           |           |           |   |           |           |           |
|---|-----------|-----------|-----------|---|-----------|-----------|-----------|
| C | 21.172478 | 14.803300 | 9.965220  | C | 7.545523  | 11.399309 | 9.867110  |
| C | 20.492525 | 16.031048 | 10.049627 | C | 14.531792 | 6.374592  | 9.310708  |
| C | 19.094980 | 16.081524 | 10.254601 | C | 12.383390 | 5.265129  | 8.964146  |
| C | 21.283054 | 17.272627 | 10.009500 | C | 13.750827 | 5.248744  | 8.924910  |
| C | 22.655861 | 17.216675 | 9.484632  | C | 7.494617  | 16.260412 | 9.530241  |
| C | 23.301588 | 15.998949 | 9.420934  | C | 9.498679  | 5.221011  | 8.942133  |
| C | 22.601734 | 14.773722 | 9.716952  | C | 16.939224 | 17.702145 | 12.141849 |
| C | 23.283962 | 13.552796 | 9.631666  | C | 12.922905 | 12.910345 | 6.889498  |
| C | 22.580416 | 12.337277 | 9.663554  | C | 14.177453 | 12.766549 | 6.076488  |
| C | 16.856049 | 12.356179 | 10.499267 | C | 15.518225 | 12.971041 | 6.795790  |
| C | 16.182325 | 13.633174 | 10.916776 | C | 15.819138 | 14.439340 | 7.058187  |
| C | 16.928493 | 14.899402 | 10.545137 | C | 18.201504 | 13.877479 | 6.952693  |
| C | 16.215727 | 16.083761 | 10.450405 | O | 26.523182 | 12.999976 | 11.220317 |
| C | 16.942783 | 17.405933 | 10.571123 | O | 24.630140 | 14.053415 | 11.903630 |
| C | 18.411583 | 17.343653 | 10.206879 | O | 16.285378 | 13.695157 | 12.405854 |
| C | 20.538719 | 18.581320 | 9.939535  | O | 21.129932 | 18.124088 | 11.192320 |
| C | 19.068134 | 18.525774 | 9.924522  | O | 21.148594 | 22.046221 | 8.767791  |
| C | 24.691986 | 15.944887 | 8.982128  | O | 18.342464 | 5.866761  | 7.516799  |
| C | 25.378204 | 14.780458 | 8.995483  | O | 19.765211 | 5.866125  | 9.278170  |
| C | 21.236067 | 19.746622 | 9.340139  | O | 14.245811 | 7.851377  | 11.268644 |
| C | 23.317123 | 18.441086 | 9.071695  | O | 21.066669 | 11.513578 | 11.380493 |
| C | 22.565500 | 19.664686 | 9.019727  | O | 14.128831 | 19.532093 | 9.202816  |
| C | 18.360580 | 19.746189 | 9.648769  | O | 26.569862 | 17.169041 | 8.119296  |
| C | 16.964500 | 19.714050 | 9.595860  | O | 10.129448 | 11.261871 | 12.080474 |
| C | 16.226078 | 18.567316 | 9.901337  | O | 6.396070  | 16.235474 | 8.992594  |
| C | 14.789747 | 16.097975 | 10.378710 | O | 8.020413  | 17.425783 | 10.017885 |
| C | 14.053797 | 14.918253 | 10.543281 | O | 9.560810  | 4.625169  | 7.878221  |
| C | 14.702825 | 13.672524 | 10.614265 | O | 8.743958  | 4.785011  | 9.989012  |
| C | 16.104445 | 11.192539 | 10.355611 | O | 17.932978 | 17.797445 | 12.829010 |
| C | 16.754999 | 9.936316  | 10.114105 | O | 15.674815 | 17.829657 | 12.624109 |
| C | 18.240547 | 9.828588  | 10.322646 | O | 6.122609  | 8.970290  | 9.558101  |
| C | 21.035778 | 9.904080  | 9.471501  | O | 24.957136 | 9.988723  | 8.167442  |
| C | 22.377901 | 9.958017  | 9.105380  | O | 18.308386 | 9.434309  | 11.754234 |
| C | 23.152279 | 11.130330 | 9.217144  | O | 12.378011 | 15.169373 | 12.228841 |
| C | 18.878960 | 8.700244  | 9.526933  | O | 14.179963 | 12.475411 | 4.887759  |
| C | 20.223839 | 8.795363  | 9.178691  | O | 14.964221 | 15.290576 | 7.226624  |
| C | 24.529961 | 11.165354 | 8.728166  | O | 17.126719 | 14.821458 | 7.132348  |
| C | 25.290785 | 12.275225 | 8.820395  | H | 26.428368 | 14.778417 | 8.690588  |
| C | 25.397760 | 17.198868 | 8.541752  | H | 23.074089 | 20.554724 | 8.645622  |
| C | 24.633944 | 18.418127 | 8.641731  | H | 16.467506 | 20.626143 | 9.246826  |
| C | 20.454376 | 20.935261 | 9.153089  | H | 22.834494 | 9.077997  | 8.650226  |
| C | 19.087387 | 20.927883 | 9.319133  | H | 18.520988 | 21.845667 | 9.131168  |
| C | 14.845863 | 18.485970 | 9.698950  | H | 25.131054 | 19.338970 | 8.329858  |
| C | 14.091166 | 17.322517 | 9.998345  | H | 26.332205 | 12.277588 | 8.493161  |
| C | 13.967220 | 12.485242 | 10.511445 | H | 20.700686 | 7.960068  | 8.663175  |
| C | 14.643969 | 11.228071 | 10.377055 | H | 25.118958 | 14.040344 | 12.755280 |
| C | 24.789043 | 13.506564 | 9.524214  | H | 15.727426 | 12.969210 | 12.753738 |
| C | 25.428558 | 13.466328 | 10.982939 | H | 20.529793 | 22.787142 | 8.630621  |
| C | 18.091356 | 7.564688  | 9.221128  | H | 16.388971 | 5.519782  | 8.773925  |
| C | 16.056978 | 8.773911  | 9.897214  | H | 12.230609 | 18.203274 | 9.411493  |
| C | 13.903725 | 10.059216 | 10.228029 | H | 20.093063 | 5.096651  | 8.762872  |
| C | 12.516460 | 12.515085 | 10.457368 | H | 6.554046  | 13.881199 | 9.556617  |
| C | 12.562521 | 14.996088 | 10.762157 | H | 14.728448 | 20.265913 | 8.975964  |
| C | 12.717356 | 17.311123 | 9.807306  | H | 6.465112  | 11.415751 | 9.698845  |
| C | 16.700592 | 7.553657  | 9.459259  | H | 14.273079 | 4.355671  | 8.572911  |

|   |           |           |           |   |           |           |           |
|---|-----------|-----------|-----------|---|-----------|-----------|-----------|
| C | 14.606575 | 8.768537  | 10.175595 | H | 11.832660 | 4.377592  | 8.654070  |
| C | 12.465065 | 10.068929 | 10.200607 | H | 10.504182 | 10.412142 | 12.389441 |
| C | 11.797135 | 11.279202 | 10.356377 | H | 7.345144  | 18.111609 | 9.824843  |
| C | 11.826761 | 13.726249 | 10.467388 | H | 8.284814  | 3.972451  | 9.681788  |
| C | 11.928920 | 16.179785 | 10.081878 | H | 15.765272 | 17.975924 | 13.590077 |
| C | 10.572557 | 16.182827 | 9.811941  | H | 10.129055 | 17.106480 | 9.443666  |
| C | 13.816188 | 7.526599  | 9.902145  | H | 7.552007  | 6.841654  | 9.184069  |
| C | 15.900809 | 6.408131  | 9.175318  | H | 25.894468 | 10.077523 | 7.913972  |
| C | 18.713984 | 6.372821  | 8.565717  | H | 19.225397 | 9.591733  | 12.059568 |
| C | 10.404520 | 13.777075 | 10.241636 | H | 13.024991 | 15.847576 | 12.513767 |
| C | 10.312621 | 11.294321 | 10.604482 | H | 12.039203 | 12.840910 | 6.245423  |
| C | 11.711842 | 8.839943  | 9.941771  | H | 12.888557 | 12.112791 | 7.650428  |
| C | 12.357122 | 7.638837  | 9.695781  | H | 12.939306 | 13.867105 | 7.433118  |
| C | 11.636080 | 6.448087  | 9.306990  | H | 16.294254 | 12.497176 | 6.182219  |
| C | 10.272785 | 8.898719  | 9.841355  | H | 15.504520 | 12.468662 | 7.780000  |
| C | 9.591876  | 10.089683 | 10.050674 | H | 18.099146 | 13.010614 | 7.621389  |
| C | 9.660837  | 12.597458 | 10.225641 | H | 18.262783 | 13.546474 | 5.905196  |
| C | 9.750206  | 15.038158 | 9.968550  | H | 19.113108 | 14.426872 | 7.216146  |
| C | 8.336842  | 15.048562 | 9.758066  |   |           |           |           |

GO-MAA-enol (below)

|   |           |           |           |   |           |           |           |
|---|-----------|-----------|-----------|---|-----------|-----------|-----------|
| C | 18.887667 | 11.133153 | 10.244670 | C | 7.544085  | 13.842443 | 10.048660 |
| C | 18.234711 | 12.329309 | 10.434180 | C | 8.193236  | 12.605038 | 10.216123 |
| C | 18.982368 | 13.595994 | 10.437765 | C | 10.169028 | 6.509521  | 9.253564  |
| C | 20.379507 | 13.596430 | 10.269522 | C | 9.440837  | 7.704229  | 9.575694  |
| C | 21.131859 | 12.333241 | 10.258425 | C | 8.105601  | 10.159265 | 10.068240 |
| C | 20.351097 | 11.058145 | 10.190806 | C | 8.055943  | 7.747220  | 9.510636  |
| C | 18.290773 | 14.846854 | 10.502930 | C | 7.296621  | 8.942666  | 9.783050  |
| C | 21.114971 | 14.796567 | 10.089785 | C | 7.470934  | 11.386752 | 10.111250 |
| C | 20.433346 | 16.024067 | 10.170297 | C | 14.457960 | 6.398703  | 9.272749  |
| C | 19.033030 | 16.070871 | 10.353302 | C | 12.305669 | 5.313980  | 8.872328  |
| C | 21.218428 | 17.268719 | 10.122414 | C | 13.673371 | 5.295219  | 8.833793  |
| C | 22.598633 | 17.210896 | 9.617079  | C | 7.401882  | 16.255602 | 9.900368  |
| C | 23.248451 | 15.994093 | 9.570486  | C | 9.421653  | 5.281343  | 8.834425  |
| C | 22.545942 | 14.767715 | 9.855508  | C | 16.880213 | 17.661446 | 12.217297 |
| C | 23.227240 | 13.545872 | 9.761526  | C | 13.499602 | 12.664233 | 7.194814  |
| C | 22.520172 | 12.332609 | 9.761276  | C | 14.984337 | 12.788651 | 7.159641  |
| C | 16.793873 | 12.341550 | 10.575680 | C | 15.657404 | 13.983960 | 7.252325  |
| C | 16.125193 | 13.616503 | 11.002116 | C | 17.088259 | 14.005342 | 7.114821  |
| C | 16.865561 | 14.883730 | 10.622713 | C | 19.054842 | 15.312483 | 6.925916  |
| C | 16.149548 | 16.066969 | 10.532942 | O | 26.444662 | 12.962619 | 11.382568 |
| C | 16.875921 | 17.392641 | 10.643965 | O | 24.555252 | 14.031120 | 12.050544 |
| C | 18.345003 | 17.329201 | 10.281948 | O | 16.250263 | 13.681467 | 12.490227 |
| C | 20.466599 | 18.572544 | 10.009475 | O | 21.041666 | 18.147711 | 11.280700 |
| C | 18.996971 | 18.508955 | 9.978854  | O | 21.068455 | 22.009504 | 8.753918  |
| C | 24.645464 | 15.942061 | 9.151185  | O | 18.261982 | 5.880641  | 7.512432  |
| C | 25.330818 | 14.777151 | 9.164092  | O | 19.709785 | 5.885864  | 9.252565  |
| C | 21.164791 | 19.727892 | 9.393322  | O | 14.185848 | 7.805411  | 11.283202 |
| C | 23.260490 | 18.432625 | 9.197411  | O | 20.994514 | 11.481534 | 11.450490 |
| C | 22.501635 | 19.649376 | 9.103796  | O | 14.030882 | 19.532755 | 9.375874  |
| C | 18.284321 | 19.717976 | 9.668076  | O | 26.540304 | 17.169682 | 8.330747  |
| C | 16.887577 | 19.681267 | 9.621389  | O | 10.095744 | 11.204863 | 12.255054 |
| C | 16.151520 | 18.546276 | 9.971484  | O | 6.289641  | 16.247341 | 9.391080  |
| C | 14.722127 | 16.080400 | 10.488447 | O | 7.939571  | 17.405010 | 10.413557 |

|                     |           |           |           |   |           |           |           |
|---------------------|-----------|-----------|-----------|---|-----------|-----------|-----------|
| C                   | 13.989469 | 14.900482 | 10.670967 | O | 9.468048  | 4.779543  | 7.722344  |
| C                   | 14.640985 | 13.654767 | 10.729536 | O | 8.681016  | 4.756396  | 9.849905  |
| C                   | 16.041332 | 11.180531 | 10.434021 | O | 17.859816 | 17.578224 | 12.925617 |
| C                   | 16.689653 | 9.929133  | 10.168843 | O | 15.639342 | 17.967777 | 12.681135 |
| C                   | 18.176989 | 9.820670  | 10.361262 | O | 6.046418  | 8.962347  | 9.770230  |
| C                   | 20.969742 | 9.908356  | 9.509333  | O | 24.897650 | 10.015093 | 8.220167  |
| C                   | 22.313354 | 9.967077  | 9.147943  | O | 18.258167 | 9.406996  | 11.788332 |
| C                   | 23.090689 | 11.133953 | 9.290888  | O | 12.362921 | 15.137009 | 12.407080 |
| C                   | 18.813282 | 8.703285  | 9.548496  | O | 15.625375 | 11.627290 | 6.997451  |
| C                   | 20.157709 | 8.804332  | 9.199820  | O | 17.800699 | 12.984149 | 6.971589  |
| C                   | 24.472691 | 11.175837 | 8.814808  | O | 17.628798 | 15.250758 | 7.140241  |
| C                   | 25.239862 | 12.277247 | 8.950045  | H | 26.385025 | 14.777348 | 8.872869  |
| C                   | 25.357697 | 17.197117 | 8.723701  | H | 23.011883 | 20.533978 | 8.719050  |
| C                   | 24.585745 | 18.412710 | 8.793995  | H | 16.389528 | 20.577408 | 9.234388  |
| C                   | 20.376793 | 20.904100 | 9.159356  | H | 22.770176 | 9.095891  | 8.676430  |
| C                   | 19.007725 | 20.892397 | 9.306319  | H | 18.438866 | 21.801283 | 9.085373  |
| C                   | 14.763065 | 18.474169 | 9.825612  | H | 25.083242 | 19.332527 | 8.479815  |
| C                   | 14.013966 | 17.310371 | 10.138224 | H | 26.285343 | 12.282008 | 8.635772  |
| C                   | 13.904719 | 12.467733 | 10.638226 | H | 20.634344 | 7.977888  | 8.670591  |
| C                   | 14.581828 | 11.213927 | 10.478454 | H | 25.036085 | 14.008635 | 12.906489 |
| C                   | 24.733513 | 13.497542 | 9.669727  | H | 15.715052 | 12.942191 | 12.845657 |
| C                   | 25.357016 | 13.440078 | 11.135087 | H | 20.446440 | 22.742022 | 8.589397  |
| C                   | 18.024218 | 7.573790  | 9.224862  | H | 16.311342 | 5.555295  | 8.706966  |
| C                   | 15.990967 | 8.771765  | 9.933387  | H | 12.132692 | 18.203144 | 9.638674  |
| C                   | 13.840890 | 10.048014 | 10.318471 | H | 20.034363 | 5.121113  | 8.728484  |
| C                   | 12.453537 | 12.498550 | 10.608063 | H | 6.464446  | 13.872857 | 9.894032  |
| C                   | 12.505315 | 14.976828 | 10.933012 | H | 14.616043 | 20.297539 | 9.227000  |
| C                   | 12.632668 | 17.303181 | 9.999331  | H | 6.386227  | 11.404559 | 9.973043  |
| C                   | 16.632057 | 7.562717  | 9.462046  | H | 14.193268 | 4.418213  | 8.440602  |
| C                   | 14.542644 | 8.759807  | 10.221104 | H | 11.752748 | 4.443385  | 8.520372  |
| C                   | 12.401418 | 10.058455 | 10.308573 | H | 10.487603 | 10.353900 | 12.538519 |
| C                   | 11.733700 | 11.263866 | 10.500854 | H | 7.258762  | 18.095671 | 10.261658 |
| C                   | 11.762748 | 13.709818 | 10.645028 | H | 8.217818  | 3.972556  | 9.480343  |
| C                   | 11.851950 | 16.168678 | 10.286133 | H | 15.730405 | 18.061794 | 13.653623 |
| C                   | 10.485841 | 16.175343 | 10.065346 | H | 10.029180 | 17.104692 | 9.728239  |
| C                   | 13.747319 | 7.528105  | 9.910153  | H | 7.473868  | 6.859605  | 9.263009  |
| C                   | 15.827683 | 6.430060  | 9.141554  | H | 25.835464 | 10.108644 | 7.970640  |
| C                   | 18.645010 | 6.388884  | 8.556450  | H | 19.169346 | 9.592502  | 12.095768 |
| C                   | 10.335798 | 13.762361 | 10.459799 | H | 13.020386 | 15.809592 | 12.680348 |
| C                   | 10.254146 | 11.271230 | 10.776620 | H | 13.202038 | 11.857762 | 7.879762  |
| C                   | 11.644617 | 8.838813  | 10.018735 | H | 15.113813 | 14.915603 | 7.386978  |
| C                   | 12.286963 | 7.648806  | 9.718654  | H | 13.024115 | 13.601299 | 7.507832  |
| C                   | 11.561763 | 6.478728  | 9.277172  | H | 13.130557 | 12.390820 | 6.193521  |
| C                   | 10.203625 | 8.899374  | 9.940877  | H | 16.616020 | 11.868690 | 6.960145  |
| C                   | 9.524673  | 10.079623 | 10.206317 | H | 19.584841 | 14.657814 | 7.629947  |
| C                   | 9.592331  | 12.581598 | 10.441141 | H | 19.299971 | 15.007939 | 5.898479  |
| C                   | 9.670902  | 15.027409 | 10.231219 | H | 19.327198 | 16.360365 | 7.093393  |
| C                   | 8.251061  | 15.039353 | 10.067134 |   |           |           |           |
| GO-DMM-keto (below) |           |           |           |   |           |           |           |
| C                   | 18.983673 | 11.113899 | 10.292541 | C | 7.654380  | 13.817480 | 9.867412  |
| C                   | 18.329723 | 12.314379 | 10.453397 | C | 8.295623  | 12.586021 | 10.093264 |
| C                   | 19.076683 | 13.581357 | 10.431775 | C | 10.274055 | 6.460427  | 9.360334  |
| C                   | 20.471806 | 13.578873 | 10.248034 | C | 9.542881  | 7.666430  | 9.631413  |

|   |           |           |           |   |           |           |           |
|---|-----------|-----------|-----------|---|-----------|-----------|-----------|
| C | 21.225330 | 12.316044 | 10.250379 | C | 8.204723  | 10.137721 | 10.030376 |
| C | 20.447020 | 11.038740 | 10.226830 | C | 8.159088  | 7.710209  | 9.544384  |
| C | 18.387980 | 14.833776 | 10.495263 | C | 7.397846  | 8.913267  | 9.775121  |
| C | 21.207907 | 14.775990 | 10.053120 | C | 7.571513  | 11.366407 | 10.020055 |
| C | 20.531080 | 16.005213 | 10.141660 | C | 14.562358 | 6.342755  | 9.456299  |
| C | 19.131605 | 16.056499 | 10.338717 | C | 12.414681 | 5.250175  | 9.052497  |
| C | 21.321136 | 17.246653 | 10.101523 | C | 13.782503 | 5.227032  | 9.040347  |
| C | 22.699856 | 17.188288 | 9.592659  | C | 7.515491  | 16.221458 | 9.618696  |
| C | 23.343931 | 15.969065 | 9.530472  | C | 9.532783  | 5.216029  | 8.980751  |
| C | 22.638342 | 14.743020 | 9.809538  | C | 16.950871 | 17.701654 | 12.179317 |
| C | 23.314816 | 13.519566 | 9.708203  | C | 14.003769 | 13.527122 | 6.623147  |
| C | 22.605350 | 12.307178 | 9.730218  | C | 14.738345 | 14.831396 | 6.866813  |
| C | 16.888857 | 12.327547 | 10.590620 | C | 16.222956 | 14.619029 | 7.073808  |
| C | 16.214422 | 13.609972 | 10.982756 | C | 18.372957 | 15.505026 | 6.633828  |
| C | 16.962984 | 14.874011 | 10.608980 | C | 12.024117 | 12.323150 | 7.095850  |
| C | 16.250414 | 16.057493 | 10.498875 | O | 26.602306 | 12.973098 | 11.236645 |
| C | 16.973700 | 17.382847 | 10.615077 | O | 24.657345 | 13.863024 | 12.001920 |
| C | 18.447460 | 17.318216 | 10.269745 | O | 16.309004 | 13.693488 | 12.473592 |
| C | 20.574850 | 18.555490 | 10.007439 | O | 21.150829 | 18.112022 | 11.271020 |
| C | 19.104980 | 18.497501 | 9.975037  | O | 21.192472 | 22.001698 | 8.782434  |
| C | 24.739281 | 15.915742 | 9.105513  | O | 18.427814 | 5.738023  | 7.797866  |
| C | 25.417234 | 14.746398 | 9.094326  | O | 19.792749 | 5.821673  | 9.604439  |
| C | 21.278027 | 19.714508 | 9.403121  | O | 14.260418 | 7.824374  | 11.408242 |
| C | 23.366894 | 18.411957 | 9.187782  | O | 21.107864 | 11.494411 | 11.466238 |
| C | 22.613745 | 19.633451 | 9.110725  | O | 14.165475 | 19.495159 | 9.207469  |
| C | 18.398018 | 19.711214 | 9.668034  | O | 26.643478 | 17.147984 | 8.312045  |
| C | 17.002811 | 19.675909 | 9.600288  | O | 10.160683 | 11.249704 | 12.213694 |
| C | 16.261496 | 18.534336 | 9.920938  | O | 6.388665  | 16.182941 | 9.143503  |
| C | 14.823943 | 16.068581 | 10.418416 | O | 8.069631  | 17.404070 | 10.027617 |
| C | 14.087279 | 14.889568 | 10.592366 | O | 9.603734  | 4.660288  | 7.895719  |
| C | 14.735346 | 13.644782 | 10.680563 | O | 8.768264  | 4.740769  | 10.003254 |
| C | 16.136715 | 11.164708 | 10.466272 | O | 17.936504 | 17.821541 | 12.874036 |
| C | 16.786066 | 9.904968  | 10.247823 | O | 15.679955 | 17.820242 | 12.647268 |
| C | 18.273048 | 9.805367  | 10.452791 | O | 6.147794  | 8.932547  | 9.753718  |
| C | 21.060543 | 9.870623  | 9.570312  | O | 24.952887 | 9.967776  | 8.176872  |
| C | 22.394531 | 9.926501  | 9.176735  | O | 18.347898 | 9.443853  | 11.893754 |
| C | 23.168434 | 11.101234 | 9.270953  | O | 12.416471 | 15.182492 | 12.275795 |
| C | 18.911972 | 8.658491  | 9.687115  | O | 14.380841 | 12.641044 | 5.878481  |
| C | 20.251356 | 8.749256  | 9.320225  | O | 16.720474 | 13.724089 | 7.735127  |
| C | 24.538500 | 11.137418 | 8.761271  | O | 16.938906 | 15.594685 | 6.458961  |
| C | 25.305437 | 12.243127 | 8.857930  | O | 12.835501 | 13.502025 | 7.313921  |
| C | 25.458935 | 17.173857 | 8.698803  | H | 26.470057 | 14.745621 | 8.798326  |
| C | 24.691675 | 18.391678 | 8.783317  | H | 23.127239 | 20.520288 | 8.735457  |
| C | 20.495499 | 20.896524 | 9.179599  | H | 16.510160 | 20.578720 | 9.221838  |
| C | 19.126406 | 20.888227 | 9.324009  | H | 22.845663 | 9.044296  | 8.720475  |
| C | 14.881847 | 18.450905 | 9.715221  | H | 18.560619 | 21.800537 | 9.109568  |
| C | 14.125051 | 17.289639 | 10.018435 | H | 25.193403 | 19.313576 | 8.481986  |
| C | 13.998416 | 12.457891 | 10.597838 | H | 26.342781 | 12.246535 | 8.517890  |
| C | 14.676490 | 11.200147 | 10.484213 | H | 20.724665 | 7.903850  | 8.817415  |
| C | 24.818645 | 13.464856 | 9.590818  | H | 25.158453 | 13.825837 | 12.845965 |
| C | 25.477379 | 13.383097 | 11.039114 | H | 15.819184 | 12.921716 | 12.825485 |
| C | 18.127892 | 7.511680  | 9.418668  | H | 20.574305 | 22.739416 | 8.626947  |
| C | 16.088810 | 8.739333  | 10.049335 | H | 16.424313 | 5.476586  | 8.953984  |
| C | 13.935646 | 10.030086 | 10.356646 | H | 12.262589 | 18.159557 | 9.416821  |
| C | 12.547860 | 12.486675 | 10.557060 | H | 20.137955 | 5.028747  | 9.138614  |

|   |           |           |           |   |           |           |           |
|---|-----------|-----------|-----------|---|-----------|-----------|-----------|
| C | 12.597176 | 14.972850 | 10.812185 | H | 6.577446  | 13.844704 | 9.694396  |
| C | 12.751044 | 17.271643 | 9.820317  | H | 14.759106 | 20.248207 | 9.034509  |
| C | 16.734482 | 7.510567  | 9.637654  | H | 6.489302  | 11.381530 | 9.863632  |
| C | 14.636624 | 8.738494  | 10.317818 | H | 14.306809 | 4.335829  | 8.686627  |
| C | 12.495817 | 10.039868 | 10.333714 | H | 11.865999 | 4.369984  | 8.718552  |
| C | 11.827593 | 11.250234 | 10.483037 | H | 10.561261 | 10.415787 | 12.533003 |
| C | 11.858604 | 13.698242 | 10.550409 | H | 7.384485  | 18.082745 | 9.844549  |
| C | 11.962728 | 16.143570 | 10.111881 | H | 8.310988  | 3.941506  | 9.660428  |
| C | 10.604868 | 16.143108 | 9.849967  | H | 15.759117 | 17.984541 | 13.611197 |
| C | 13.843799 | 7.496415  | 10.039776 | H | 10.160072 | 17.059654 | 9.466354  |
| C | 15.934177 | 6.366678  | 9.348811  | H | 7.578683  | 6.816702  | 9.315211  |
| C | 18.766005 | 6.292881  | 8.833340  | H | 25.885616 | 10.058553 | 7.907628  |
| C | 10.435724 | 13.747580 | 10.335272 | H | 19.264551 | 9.617962  | 12.191266 |
| C | 10.344228 | 11.268206 | 10.737496 | H | 13.140384 | 15.776036 | 12.564039 |
| C | 11.741867 | 8.812237  | 10.071796 | H | 14.333974 | 15.336068 | 7.756886  |
| C | 12.386926 | 7.612510  | 9.819480  | H | 14.567863 | 15.492431 | 6.004472  |
| C | 11.666519 | 6.429257  | 9.405319  | H | 18.638256 | 15.630478 | 7.691999  |
| C | 10.302045 | 8.871668  | 9.970891  | H | 18.738964 | 14.530747 | 6.282845  |
| C | 9.621683  | 10.060447 | 10.191631 | H | 18.790291 | 16.319511 | 6.032517  |
| C | 9.690521  | 12.567637 | 10.345779 | H | 11.778181 | 12.220915 | 6.030354  |
| C | 9.780663  | 15.004692 | 10.040203 | H | 12.561579 | 11.425653 | 7.431216  |
| C | 8.363951  | 15.013935 | 9.848432  | H | 11.120352 | 12.478558 | 7.694328  |

GO-DMM-enol (below)

|   |           |           |           |   |           |           |           |
|---|-----------|-----------|-----------|---|-----------|-----------|-----------|
| C | 18.967607 | 11.171733 | 10.164816 | C | 7.636304  | 13.878268 | 9.896338  |
| C | 18.316399 | 12.369448 | 10.352730 | C | 8.280383  | 12.643371 | 10.098135 |
| C | 19.065784 | 13.634648 | 10.360989 | C | 10.248740 | 6.517200  | 9.325926  |
| C | 20.462416 | 13.632292 | 10.191706 | C | 9.521391  | 7.722360  | 9.608385  |
| C | 21.212395 | 12.367412 | 10.174496 | C | 8.188419  | 10.194204 | 10.020896 |
| C | 20.430519 | 11.093743 | 10.108356 | C | 8.136398  | 7.764989  | 9.540756  |
| C | 18.377180 | 14.886555 | 10.437011 | C | 7.378440  | 8.969682  | 9.773811  |
| C | 21.200693 | 14.831667 | 10.021809 | C | 7.555995  | 11.424290 | 10.023070 |
| C | 20.523266 | 16.060339 | 10.118799 | C | 14.537963 | 6.414326  | 9.303577  |
| C | 19.122612 | 16.110123 | 10.303089 | C | 12.384235 | 5.312350  | 8.963266  |
| C | 21.312634 | 17.302256 | 10.083638 | C | 13.751232 | 5.295981  | 8.907869  |
| C | 22.692238 | 17.245584 | 9.576306  | C | 7.500108  | 16.288256 | 9.697639  |
| C | 23.337336 | 16.027035 | 9.511036  | C | 9.500359  | 5.273594  | 8.959238  |
| C | 22.631367 | 14.799908 | 9.783055  | C | 16.943855 | 17.733583 | 12.152752 |
| C | 23.308649 | 13.576831 | 9.674970  | C | 14.894434 | 13.514279 | 7.115452  |
| C | 22.598976 | 12.364891 | 9.672898  | C | 15.601888 | 14.705647 | 7.188326  |
| C | 16.876003 | 12.383459 | 10.493912 | C | 17.013102 | 14.620839 | 7.066822  |
| C | 16.206808 | 13.658716 | 10.918028 | C | 19.092875 | 15.742473 | 6.868755  |
| C | 16.951546 | 14.925858 | 10.550118 | C | 12.865376 | 12.273538 | 7.042201  |
| C | 16.238152 | 16.109945 | 10.460291 | O | 26.547874 | 12.985637 | 11.256763 |
| C | 16.963112 | 17.432817 | 10.583412 | O | 24.655924 | 14.026244 | 11.962775 |
| C | 18.437023 | 17.370260 | 10.239019 | O | 16.321524 | 13.719387 | 12.408478 |
| C | 20.563847 | 18.610319 | 9.985674  | O | 21.137873 | 18.168503 | 11.250904 |
| C | 19.094154 | 18.550161 | 9.948565  | O | 21.179377 | 22.056568 | 8.760954  |
| C | 24.732592 | 15.975439 | 9.085939  | O | 18.336540 | 5.873119  | 7.507605  |
| C | 25.412069 | 14.807123 | 9.075411  | O | 19.786161 | 5.916585  | 9.245836  |
| C | 21.267174 | 19.769539 | 9.382553  | O | 14.280181 | 7.869266  | 11.281359 |
| C | 23.358805 | 18.470118 | 9.172673  | O | 21.077822 | 11.514795 | 11.367252 |
| C | 22.604298 | 19.690483 | 9.094624  | O | 14.148279 | 19.554243 | 9.206022  |
| C | 18.385799 | 19.762331 | 9.638862  | O | 26.635101 | 17.207045 | 8.290649  |

|   |           |           |           |   |           |           |           |
|---|-----------|-----------|-----------|---|-----------|-----------|-----------|
| C | 16.990181 | 19.727209 | 9.573125  | O | 10.174221 | 11.292192 | 12.184952 |
| C | 16.248774 | 18.587805 | 9.898837  | O | 6.395892  | 16.273804 | 9.171572  |
| C | 14.811762 | 16.122906 | 10.393109 | O | 8.030672  | 17.442804 | 10.206380 |
| C | 14.076421 | 14.944216 | 10.564786 | O | 9.539734  | 4.730018  | 7.866714  |
| C | 14.725134 | 13.698781 | 10.632983 | O | 8.769544  | 4.786381  | 10.000193 |
| C | 16.123146 | 11.221983 | 10.356840 | O | 17.931299 | 17.834030 | 12.848197 |
| C | 16.769958 | 9.967937  | 10.103646 | O | 15.675155 | 17.856438 | 12.625685 |
| C | 18.257542 | 9.860422  | 10.291902 | O | 6.128236  | 8.990183  | 9.760798  |
| C | 21.044466 | 9.941703  | 9.425753  | O | 24.974585 | 10.033195 | 8.148174  |
| C | 22.386454 | 9.998775  | 9.060085  | O | 18.343594 | 9.455388  | 11.720914 |
| C | 23.165846 | 11.164721 | 9.201701  | O | 12.422619 | 15.206684 | 12.268646 |
| C | 18.889343 | 8.736229  | 9.485872  | O | 15.483962 | 12.346472 | 6.965371  |
| C | 20.230558 | 8.836130  | 9.125508  | O | 17.646990 | 13.531346 | 6.926232  |
| C | 24.547684 | 11.201619 | 8.726054  | O | 17.671337 | 15.805596 | 7.107963  |
| C | 25.313774 | 12.305205 | 8.847163  | O | 13.561062 | 13.532265 | 7.196477  |
| C | 25.451233 | 17.233545 | 8.679838  | H | 26.464632 | 14.807366 | 8.778501  |
| C | 24.683926 | 18.450779 | 8.768119  | H | 23.117195 | 20.578102 | 8.720534  |
| C | 20.483273 | 20.949635 | 9.155074  | H | 16.497643 | 20.629501 | 9.193172  |
| C | 19.113384 | 20.938961 | 9.293467  | H | 22.840771 | 9.126426  | 8.588264  |
| C | 14.866678 | 18.507563 | 9.704384  | H | 18.547131 | 21.849951 | 9.074549  |
| C | 14.110180 | 17.346798 | 10.011292 | H | 25.184866 | 19.373396 | 8.467866  |
| C | 13.988076 | 12.512081 | 10.542213 | H | 26.358704 | 12.307684 | 8.531147  |
| C | 14.663942 | 11.256092 | 10.400206 | H | 20.704037 | 8.006863  | 8.597633  |
| C | 24.813705 | 13.525074 | 9.571674  | H | 25.147018 | 13.997077 | 12.812716 |
| C | 25.452656 | 13.456049 | 11.030010 | H | 15.801242 | 12.965976 | 12.756401 |
| C | 18.099630 | 7.600158  | 9.187004  | H | 20.559681 | 22.791782 | 8.599783  |
| C | 16.070574 | 8.806249  | 9.890903  | H | 16.387552 | 5.563748  | 8.734107  |
| C | 13.922365 | 10.087280 | 10.265331 | H | 12.241680 | 18.228361 | 9.445878  |
| C | 12.537573 | 12.541636 | 10.511255 | H | 20.111357 | 5.140995  | 8.738299  |
| C | 12.588533 | 15.024147 | 10.799565 | H | 6.557781  | 13.908119 | 9.733983  |
| C | 12.732758 | 17.335182 | 9.834490  | H | 14.742595 | 20.305016 | 9.025635  |
| C | 16.710150 | 7.589671  | 9.437781  | H | 6.472116  | 11.440116 | 9.878579  |
| C | 14.625051 | 8.797992  | 10.192224 | H | 14.268996 | 4.408798  | 8.535071  |
| C | 12.482754 | 10.096390 | 10.264938 | H | 11.829574 | 4.430121  | 8.644692  |
| C | 11.816398 | 11.305628 | 10.432278 | H | 10.561610 | 10.446813 | 12.490271 |
| C | 11.848584 | 13.753183 | 10.524172 | H | 7.353043  | 18.132303 | 10.035968 |
| C | 11.945731 | 16.206274 | 10.125312 | H | 8.304260  | 3.988548  | 9.664714  |
| C | 10.582693 | 16.208973 | 9.886200  | H | 15.759095 | 18.006130 | 13.591641 |
| C | 13.830435 | 7.558294  | 9.919027  | H | 10.130021 | 17.131828 | 9.526274  |
| C | 15.905694 | 6.447329  | 9.152862  | H | 7.553613  | 6.870522  | 9.320569  |
| C | 18.719954 | 6.403132  | 8.540587  | H | 25.913645 | 10.123332 | 7.901734  |
| C | 10.423381 | 13.803453 | 10.328532 | H | 19.254879 | 9.645638  | 12.025014 |
| C | 10.336576 | 11.321483 | 10.705679 | H | 13.111290 | 15.844108 | 12.549698 |
| C | 11.725939 | 8.869273  | 10.009271 | H | 15.091079 | 15.655653 | 7.303792  |
| C | 12.368164 | 7.672122  | 9.737474  | H | 16.519817 | 12.608294 | 6.923409  |
| C | 11.641610 | 6.488055  | 9.338947  | H | 19.572975 | 15.010954 | 7.531388  |
| C | 10.284786 | 8.927573  | 9.935009  | H | 19.291775 | 15.467039 | 5.823025  |
| C | 9.606766  | 10.116209 | 10.165379 | H | 19.464647 | 16.752295 | 7.076335  |
| C | 9.678246  | 12.623684 | 10.333200 | H | 12.983788 | 11.895914 | 6.016970  |
| C | 9.764206  | 15.064879 | 10.067341 | H | 13.239561 | 11.528395 | 7.755694  |
| C | 8.345826  | 15.074183 | 9.893501  | H | 11.815268 | 12.504824 | 7.249181  |

Spectroscopic results of keto-enol tautomerism of Acetylacetone (AA), Methyl acetoacetate (MAA), and Dimethyl malonate (DMM) in the presence of G, GO, and PGc

Similar to 1,1,1 trifluoromethyl 2,5-pentanedione (CF<sub>3</sub>\_DK), the characteristic band in the UV-vis spectrum near 255-275 nm was responsible for the  $\pi \rightarrow \pi^*$  transition of the enol form containing a pseudo-aromatic structure with an intramolecular H-bonding.<sup>4</sup> It showed an increase as well as a blue shift of  $\sim 20$  nm from pure to AA + PGc (Fig. S5a). In FT-IR, the O-H and C=C stretching frequency enhanced following the same trend (Fig. S5b). The zoomed view of the characteristic bands for C=O and C=C are shown separately. In <sup>1</sup>H-NMR spectrum, the intensity of the downfield chemical shift for O-H proton ( $\delta = \sim 15.4$  ppm) and the olefinic proton ( $\delta = \sim 5.5$  ppm) increased. The peak integrals were calculated by fixing the integral for -CH<sub>3</sub> peak at  $\delta = 2.00 - 2.02$  ppm as '1'. The chemical shift of the -CH<sub>3</sub> peak appeared at this position when the AA molecule remained in its enol form. There is also a minor peak at  $\delta = \sim 2.20$  ppm for keto form.<sup>5</sup> Presence of this 'keto' peak in much lower intensity signified that, there were some of the keto molecules in very low concentration but mostly, enol dominated.

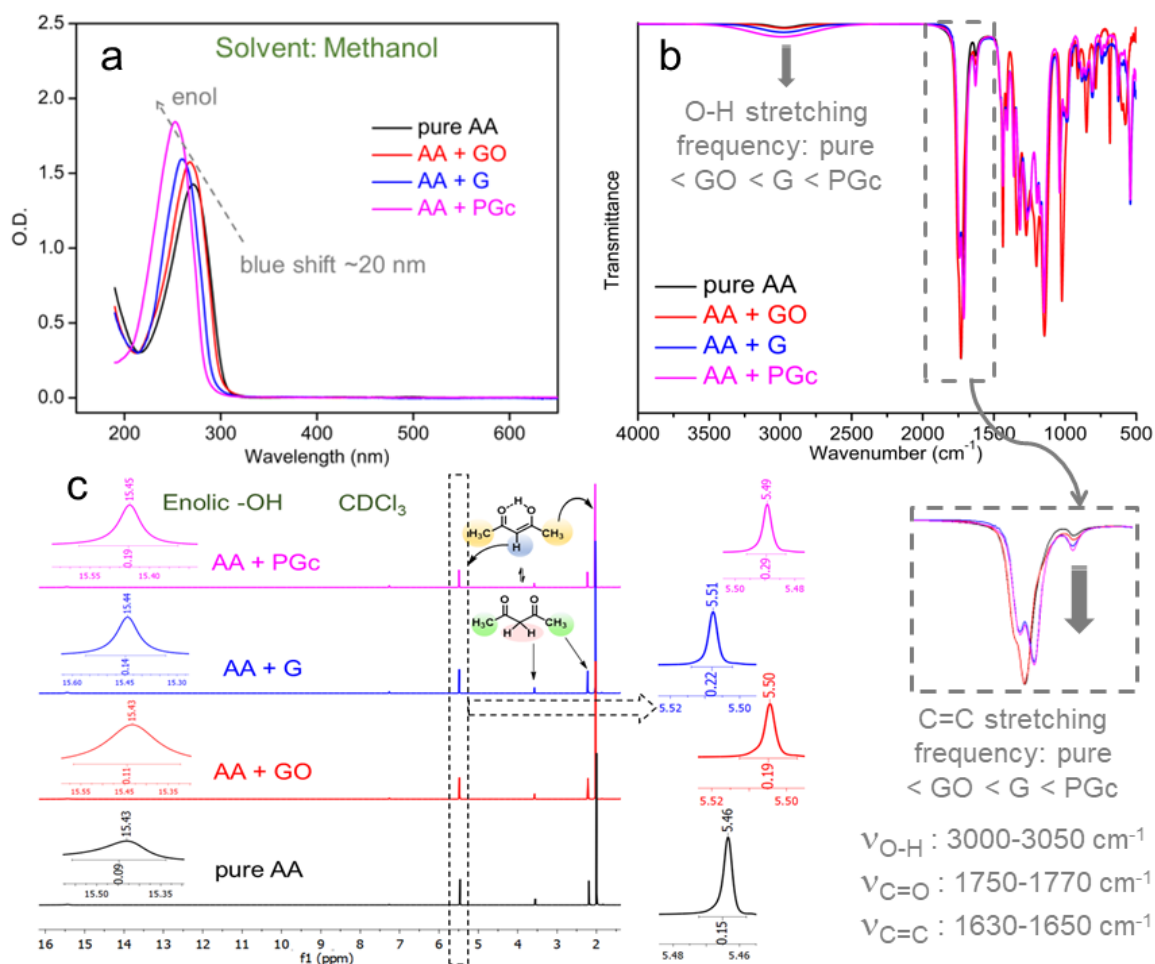

Fig. S5. Spectroscopic analyses of pure AA and its interaction with three graphitic materials: (a) UV-Vis spectrum in methanol, (b) FT-IR spectrum without any solvent, and (c) <sup>1</sup>H-NMR spectrum in CDCl<sub>3</sub>.



The enolization trend in MAA and DMM under the effect of GO, G, and PGc remained the same as for the previous molecules. Fig. S6 represents the UV-Vis, FT-IR, and  $^1\text{H-NMR}$  spectrum of MAA. The spectrum indicated the coexistence of keto and enol tautomer in both solution phase (Fig. S6a, S6c) and solvent-free phase (Fig. S6b), unlike  $\text{CF}_3\text{-DK}$  which was mostly enol-dominated. The extent of enol increased when the adsorbent changed from GO to G to PGc.<sup>6</sup> For DMM, the overall enol-content was very less (Fig. S7). This was strikingly different from the other three  $\beta$ -diketo molecules and was consistent with our theoretical results (Table S3, last column). The UV-Vis spectrum revealed a faint existence of enol tautomer in a polar, protic solvent which increased upon the addition of adsorbents in previously-mentioned sequence (Fig. S7a). In FT-IR spectrum there was no  $\nu_{\text{O-H}}$  and  $\nu_{\text{C=C}}$  in the pure DMM (Fig. S7b). These two peaks emerged upon adsorbent addition, but the evolution of the intensities ( $\text{GO} < \text{G} < \text{PGc}$ ) was quite less compared to the other three molecules. The same trend was observed in  $^1\text{H-NMR}$  spectrum where the olefinic H at  $\delta = \sim 4.7$  ppm (in GO, G, and PGc) was too small to be visualized.<sup>6</sup>

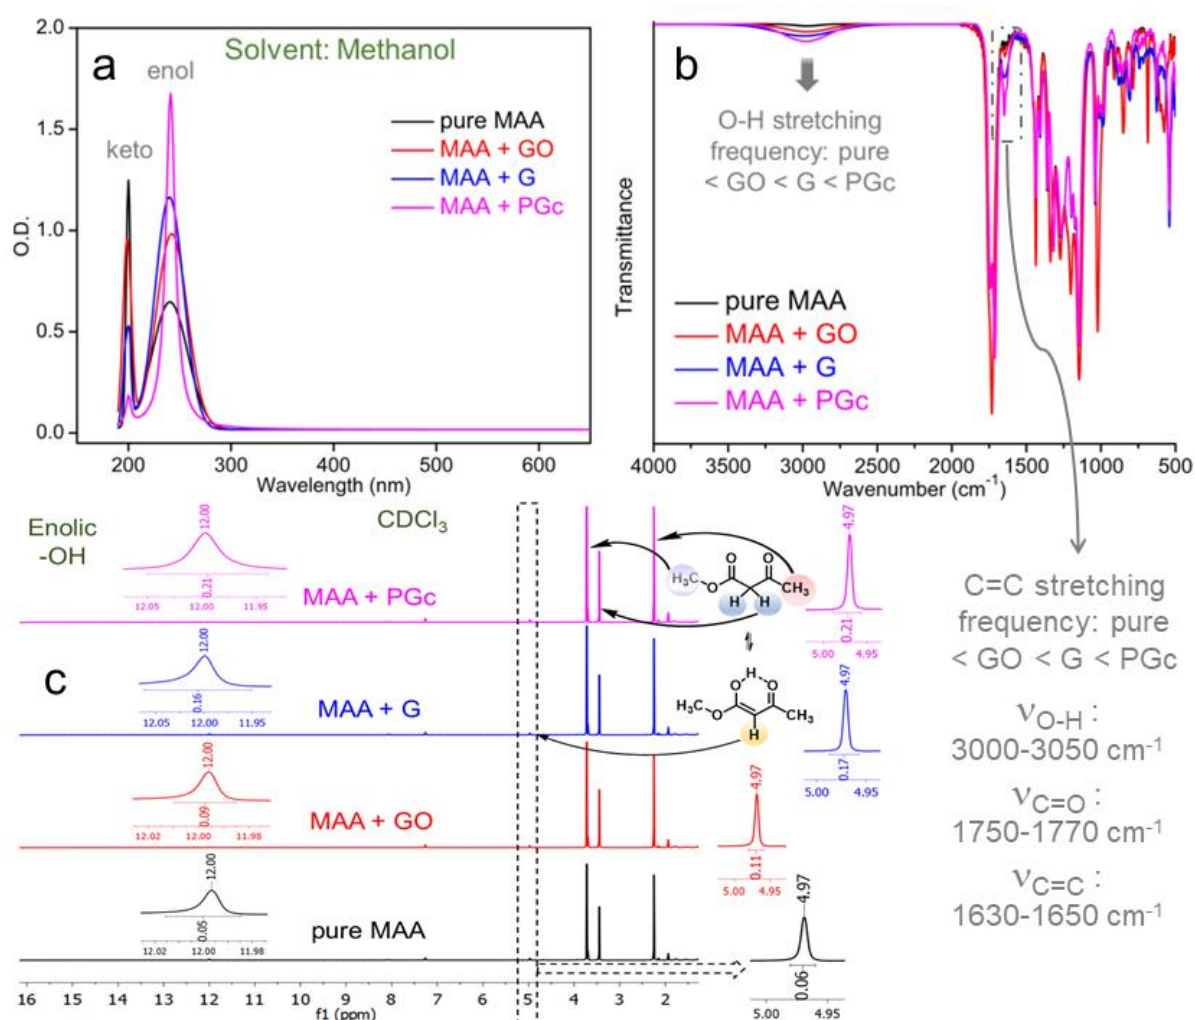

Fig. S6. Spectroscopic analyses of pure MAA and its interaction with three graphitic materials: (a) UV-Vis spectrum in methanol, (b) FT-IR spectrum without any solvent, and (c)  $^1\text{H-NMR}$  spectrum in  $\text{CDCl}_3$ .

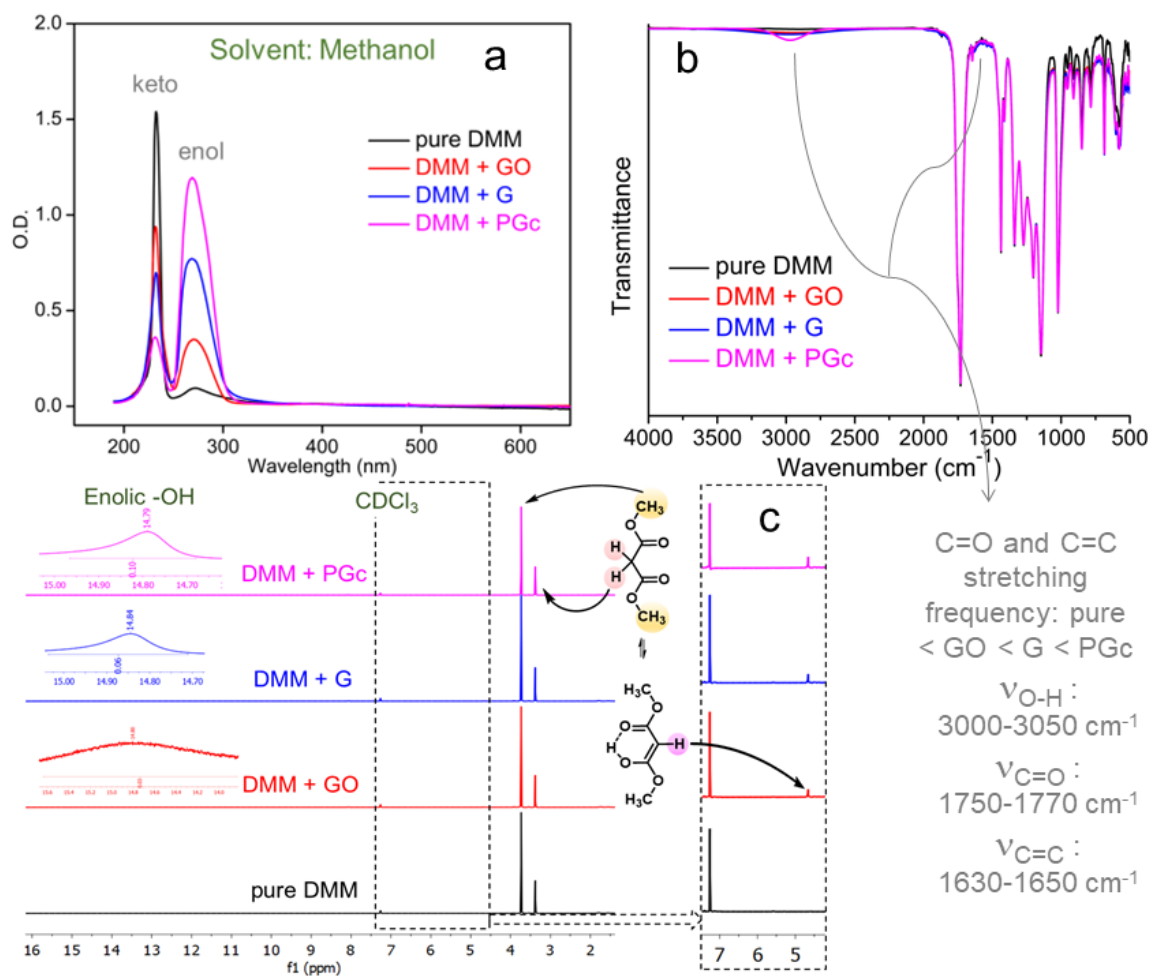

Fig. S7. Spectroscopic analyses of pure DMM and its interaction with three graphitic materials: (a) UV-Vis spectrum in methanol, (b) FT-IR spectrum without any solvent, and (c)  $^1\text{H-NMR}$  spectrum in  $\text{CDCl}_3$ .

## References

1. W. S. Hummers, R. E. Offeman, *J. Am. Chem. Soc.*, 1958, **80**, 1339.
2. S. Maity, F. Ram, B. B. Dhar, *ACS Omega*, 2020, **5**, 15962-15972.
3. R. Al-Gaashani, A. Najjar, Y. Zakaria, S. Mansour, M. Atieh, *Ceram. Int.*, 2019, **45**, 14439-14448.
4. A. S. N. Murthy, A. Balasubramanian, C. N. R. Rao, T. R. Kasturi, *Can. J. Chem.*, 1963, **40**, 2267-2271.
5. [https://www.chemicalbook.com/SpectrumEN\\_105-45-3\\_1HNMR.htm](https://www.chemicalbook.com/SpectrumEN_105-45-3_1HNMR.htm)
6. [https://www.chemicalbook.com/SpectrumEN\\_108-59-8\\_1HNMR.htm](https://www.chemicalbook.com/SpectrumEN_108-59-8_1HNMR.htm)
